# Supplementary material for: Reduced Chlorine in Drinking Water Distribution Systems Impacts Bacterial Biodiversity in Biofilms
Source: Front Microbiol. 2018 Oct 23;9:2520. doi: 10.3389/fmicb.2018.02520 (PMC6205969; doi:10.3389/fmicb.2018.02520)
Supplement: TABLE S1 — OTU counts and taxonomic assignment for all samples. [file Table_1.XLSX]

## Sheet: Supplementary_table_1
sample_name	OTU_ID	counts	kingdom	phylum	class	order	family	genus	species	ratio_otus
A	OTU_1	2161877	Bacteria	Proteobacteria	Gammaproteobacteria	Pseudomonadales	Pseudomonadaceae	Pseudomonas	Pseudomonas sp.	0.989062
A	OTU_10	260	Bacteria	Proteobacteria	Alphaproteobacteria	Rhizobiales	Phreatobacter_f	Phreatobacter	DQ088783_s	0.00011895
A	OTU_1060	4	Bacteria	Proteobacteria	Alphaproteobacteria	Sphingomonadales	Erythrobacteraceae	Altererythrobacter	Altererythrobacter_troitsensis	1.83e-06
A	OTU_111	4	Bacteria	Proteobacteria	Alphaproteobacteria	Rhizobiales	Hyphomicrobiaceae	Hyphomicrobium	DQ814766_s	1.83e-06
A	OTU_12	3	Bacteria	Proteobacteria	Alphaproteobacteria	Sphingomonadales	Sphingomonadaceae	Sphingorhabdus	NA	1.37e-06
A	OTU_13	1	Bacteria	Proteobacteria	Gammaproteobacteria	Pseudomonadales	Moraxellaceae	Acinetobacter	Acinetobacter_harbinensis	4.58e-07
A	OTU_133	1334	Bacteria	Proteobacteria	Betaproteobacteria	Methylophilales	Methylophilaceae	Methylotenera	NA	0.000610307
A	OTU_160	153	Bacteria	Firmicutes	Bacilli	Bacillales	Planococcaceae	Lysinibacillus	Lysinibacillus_sphaericus/Lysinibacillus_fusiformis/Lysinibacillus_mangiferihumi	7e-05
A	OTU_163	663	Bacteria	Chlamydiae	Chlamydiae_c	Chlamydiales	Waddliaceae	Waddlia	Waddlia_chondrophila	0.000303324
A	OTU_164	3	Bacteria	Proteobacteria	Betaproteobacteria	Neisseriales	Neisseriaceae	FM873692_g	FM873692_s	1.37e-06
A	OTU_189	31	Bacteria	Proteobacteria	Betaproteobacteria	Burkholderiales	Alcaligenaceae	Achromobacter	NA	1.42e-05
A	OTU_19	37	Bacteria	Proteobacteria	Betaproteobacteria	Burkholderiales	Comamonadaceae	Rhizobacter	NA	1.69e-05
A	OTU_191	32	Bacteria	Proteobacteria	Alphaproteobacteria	Rhizobiales	Phyllobacteriaceae	Mesorhizobium	AVBN_s	1.46e-05
A	OTU_2	10547	Bacteria	Proteobacteria	Gammaproteobacteria	Pseudomonadales	Pseudomonadaceae	Pseudomonas	Pseudomonas sp.	0.00482527
A	OTU_20	113	Bacteria	Proteobacteria	Betaproteobacteria	Burkholderiales	Comamonadaceae	EU978826_g	AY328716_s	5.17e-05
A	OTU_204	63	Eukarya	Bacillariophyta	FJ382328_c	FJ382328_o	FJ382328_f	FJ382328_g	FJ382188_s	2.88e-05
A	OTU_210	3	Bacteria	Proteobacteria	Alphaproteobacteria	Rhizobiales	Hyphomicrobiaceae	Hyphomicrobium	JN869143_s	1.37e-06
A	OTU_218	5	Bacteria	Proteobacteria	Gammaproteobacteria	Nevskiales	Sinobacteraceae	Nevskia	Nevskia_ramosa	2.29e-06
A	OTU_226	527	Bacteria	Proteobacteria	Alphaproteobacteria	Sphingomonadales	Sphingomonadaceae	Sphingopyxis	Sphingopyxis sp.	0.000241103
A	OTU_227	137	Bacteria	Proteobacteria	Betaproteobacteria	Burkholderiales	Comamonadaceae	Acidovorax	NA	6.27e-05
A	OTU_237	83	Bacteria	Firmicutes	Bacilli	Bacillales	Staphylococcaceae	Staphylococcus	NA	3.8e-05
A	OTU_25	9	Bacteria	Proteobacteria	Betaproteobacteria	Burkholderiales	Comamonadaceae	Acidovorax	Acidovorax_defluvii	4.12e-06
A	OTU_266	10	Bacteria	Proteobacteria	Betaproteobacteria	Burkholderiales	Oxalobacteraceae	Undibacterium	Undibacterium_oligocarboniphilum	4.58e-06
A	OTU_27	3	Bacteria	Proteobacteria	Alphaproteobacteria	Rhodobacterales	Hyphomonadaceae	CP012156_g	NA	1.37e-06
A	OTU_294	23	Bacteria	Proteobacteria	Alphaproteobacteria	Rhizobiales	Chelatococcaceae	Salinarimonas	Salinarimonas_rosea	1.05e-05
A	OTU_3	1039	Bacteria	Proteobacteria	Alphaproteobacteria	Rhizobiales	Hyphomicrobiaceae	Hyphomicrobium	AY569281_s	0.000475344
A	OTU_300	6	Bacteria	Firmicutes	Tissierellia	Tissierellales	Peptoniphilaceae	Finegoldia	Finegoldia_magna	2.75e-06
A	OTU_309	56	Bacteria	Proteobacteria	Alphaproteobacteria	Sphingomonadales	Sphingomonadaceae	Blastomonas	Blastomonas_aquatica	2.56e-05
A	OTU_32	53	Bacteria	Proteobacteria	Alphaproteobacteria	Caulobacterales	Caulobacteraceae	Phenylobacterium	Phenylobacterium_haematophilum	2.42e-05
A	OTU_328	1	Bacteria	Firmicutes	Bacilli	Bacillales	Bacillaceae	Bacillus_g6	Bacillus_pseudofirmus	4.58e-07
A	OTU_34	1105	Bacteria	Proteobacteria	Gammaproteobacteria	Pseudomonadales	Pseudomonadaceae	Pseudomonas	Pseudomonas sp.	0.000505539
A	OTU_348	14	Bacteria	Actinobacteria	Actinobacteria_c	Micrococcales	Microbacteriaceae	NA	NA	6.41e-06
A	OTU_376	646	Bacteria	Proteobacteria	Alphaproteobacteria	Rhizobiales	Hyphomicrobiaceae	Hyphomicrobium	JN869143_s	0.000295546
A	OTU_41	124	Bacteria	Proteobacteria	Alphaproteobacteria	Sphingomonadales	Sphingomonadaceae	Sphingomonas	NA	5.67e-05
A	OTU_412	16	Bacteria	Proteobacteria	Alphaproteobacteria	Sphingomonadales	Sphingomonadaceae	Sphingopyxis	Sphingopyxis sp.	7.32e-06
A	OTU_448	3	Bacteria	Cyanobacteria	JQ650114_c	JQ650114_o	JQ650114_f	FJ236035_g	FJ236035_s	1.37e-06
A	OTU_449	61	Bacteria	Firmicutes	Tissierellia	Tissierellales	Peptoniphilaceae	Anaerococcus	FM872913_s	2.79e-05
A	OTU_49	6	Bacteria	Cyanobacteria	JQ650114_c	JQ650114_o	JQ650114_f	JQ650114_g	GQ389121_s	2.75e-06
A	OTU_5	1	Bacteria	Proteobacteria	Alphaproteobacteria	Sphingomonadales	Sphingomonadaceae	Novosphingobium	NA	4.58e-07
A	OTU_502	30	Bacteria	Firmicutes	Bacilli	Lactobacillales	Streptococcaceae	Streptococcus	Streptococcus sp.	1.37e-05
A	OTU_503	57	Bacteria	Firmicutes	Bacilli	Bacillales	Bacillaceae	Anoxybacillus	Anoxybacillus_tengchongensis	2.61e-05
A	OTU_540	35	Bacteria	Proteobacteria	Betaproteobacteria	Burkholderiales	Comamonadaceae	Pelomonas	NA	1.6e-05
A	OTU_56	11	Bacteria	Proteobacteria	Alphaproteobacteria	Rhizobiales	Rhizobiaceae	Rhizobium	Rhizobium_nepotum/Rhizobium_radiobacter/CP002249_s	5.03e-06
A	OTU_578	11	Bacteria	Actinobacteria	Nitriliruptoria	Nitriliruptorales	Nitriliruptoraceae	Nitriliruptor	DQ432396_s	5.03e-06
A	OTU_580	25	Bacteria	Firmicutes	Tissierellia	Tissierellales	Peptoniphilaceae	Anaerococcus	HM587319_s	1.14e-05
A	OTU_60	297	Bacteria	Proteobacteria	Betaproteobacteria	Burkholderiales	Comamonadaceae	Aquabacterium	NA	0.000135878
A	OTU_61	154	Bacteria	Proteobacteria	Gammaproteobacteria	Xanthomonadales	Xanthomonadaceae	Stenotrophomonas	NA	7.05e-05
A	OTU_632	9	Bacteria	Proteobacteria	Betaproteobacteria	Rhodocyclales	Rhodocyclaceae	Zoogloea	Zoogloea_resiniphila	4.12e-06
A	OTU_639	3	Bacteria	Actinobacteria	Actinobacteria_c	Propionibacteriales	Propionibacteriaceae	Propionibacterium	Propionibacterium_acnes	1.37e-06
A	OTU_655	2494	Bacteria	Proteobacteria	Gammaproteobacteria	Pseudomonadales	Pseudomonadaceae	Pseudomonas	Pseudomonas sp.	0.00114101
A	OTU_7	65	Bacteria	Bacteroidetes	Flavobacteria	Flavobacteriales	Flavobacteriaceae	Flavobacterium	NA	2.97e-05
A	OTU_72	546	Eukarya	Bacillariophyta	FJ382328_c	FJ382328_o	FJ382328_f	FJ382328_g	FJ382328_s	0.000249796
A	OTU_75	272	Bacteria	Proteobacteria	Alphaproteobacteria	Rhodospirillales	AY957891_f	AY957891_g	NA	0.00012444
A	OTU_777	11	Bacteria	Firmicutes	Tissierellia	Tissierellales	Peptoniphilaceae	Peptoniphilus	Peptoniphilus_grossensis/KQ960236_s	5.03e-06
A	OTU_781	69	Bacteria	Planctomycetes	Planctomycetia	Planctomycetales	Planctomycetaceae	CP011270_g	CP011270_s	3.16e-05
A	OTU_789	1	Bacteria	Proteobacteria	Gammaproteobacteria	Pseudomonadales	Moraxellaceae	Acinetobacter	NA	4.58e-07
A	OTU_79	1253	Bacteria	Proteobacteria	Betaproteobacteria	Burkholderiales	Oxalobacteraceae	Undibacterium	Undibacterium_parvum	0.000573249
A	OTU_790	59	Bacteria	Actinobacteria	Actinobacteria_c	Planktophila_o	Planktophila_f	Planktophila	AQUA_s	2.7e-05
A	OTU_8	27	Bacteria	Proteobacteria	Alphaproteobacteria	Sphingomonadales	Sphingomonadaceae	Sphingomonas	Sphingomonas_histidinilytica	1.24e-05
A	OTU_80	17	Bacteria	Planctomycetes	Phycisphaerae	Phycisphaerales	Phycisphaeraceae	FJ572037_g	NA	7.78e-06
A	OTU_801	2	Bacteria	Proteobacteria	Gammaproteobacteria	Pseudomonadales	Pseudomonadaceae	Pseudomonas	Pseudomonas sp.	9.15e-07
A	OTU_86	16	Bacteria	Proteobacteria	Gammaproteobacteria	Xanthomonadales	Xanthomonadaceae	Pseudoxanthomonas	Pseudoxanthomonas_mexicana	7.32e-06
A	OTU_9	81	Bacteria	Proteobacteria	Alphaproteobacteria	Rhodobacterales	Hyphomonadaceae	CP012156_g	NA	3.71e-05
A	OTU_91	215	Eukarya	Bacillariophyta	FJ382328_c	FJ382328_o	FJ382328_f	FJ382328_g	FJ382188_s	9.84e-05
A	OTU_947	119	Bacteria	Actinobacteria	Actinobacteria_c	Corynebacteriales	Corynebacteriaceae	Corynebacterium	Corynebacterium_imitans	5.44e-05
A	OTU_949	505	Bacteria	Proteobacteria	Betaproteobacteria	Burkholderiales	Oxalobacteraceae	Herminiimonas	Herminiimonas_contaminans	0.000231038
A	OTU_951	248	Bacteria	Proteobacteria	Gammaproteobacteria	Pseudomonadales	Pseudomonadaceae	Pseudomonas	Pseudomonas_aeruginosa	0.00011346
A	OTU_959	3	Bacteria	Proteobacteria	Alphaproteobacteria	Caulobacterales	Caulobacteraceae	Caulobacter	Caulobacter sp.	1.37e-06
A	OTU_960	5	Bacteria	Proteobacteria	Gammaproteobacteria	Enterobacteriales	Enterobacteriaceae	Serratia	Serratia_rubidaea	2.29e-06
A	OTU_961	87	Bacteria	Proteobacteria	Gammaproteobacteria	Pseudomonadales	Pseudomonadaceae	Pseudomonas	NA	3.98e-05
A	OTU_964	2	Bacteria	Proteobacteria	Alphaproteobacteria	Sphingomonadales	Sphingomonadaceae	Sphingobium	Sphingobium_limneticum	9.15e-07
B	OTU_1	1245222	Bacteria	Proteobacteria	Gammaproteobacteria	Pseudomonadales	Pseudomonadaceae	Pseudomonas	Pseudomonas sp.	0.770465
B	OTU_10	34468	Bacteria	Proteobacteria	Alphaproteobacteria	Rhizobiales	Phreatobacter_f	Phreatobacter	DQ088783_s	0.0213266
B	OTU_111	110	Bacteria	Proteobacteria	Alphaproteobacteria	Rhizobiales	Hyphomicrobiaceae	Hyphomicrobium	DQ814766_s	6.81e-05
B	OTU_114	71	Bacteria	Proteobacteria	Alphaproteobacteria	Caulobacterales	Caulobacteraceae	Brevundimonas	Brevundimonas_nasdae/Brevundimonas_albigilva/Brevundimonas_vesicularis	4.39e-05
B	OTU_12	117	Bacteria	Proteobacteria	Alphaproteobacteria	Sphingomonadales	Sphingomonadaceae	Sphingorhabdus	NA	7.24e-05
B	OTU_13	5510	Bacteria	Proteobacteria	Gammaproteobacteria	Pseudomonadales	Moraxellaceae	Acinetobacter	Acinetobacter_harbinensis	0.00340924
B	OTU_133	5	Bacteria	Proteobacteria	Betaproteobacteria	Methylophilales	Methylophilaceae	Methylotenera	NA	3.09e-06
B	OTU_145	6	Bacteria	Proteobacteria	Gammaproteobacteria	Enterobacteriales	Enterobacteriaceae	Escherichia	NA	3.71e-06
B	OTU_160	177	Bacteria	Firmicutes	Bacilli	Bacillales	Planococcaceae	Lysinibacillus	Lysinibacillus_sphaericus/Lysinibacillus_fusiformis/Lysinibacillus_mangiferihumi	0.000109516
B	OTU_164	2	Bacteria	Proteobacteria	Betaproteobacteria	Neisseriales	Neisseriaceae	FM873692_g	FM873692_s	1.24e-06
B	OTU_186	85	Bacteria	Proteobacteria	Alphaproteobacteria	Rhizobiales	Methylobacteriaceae	Methylobacterium	Methylobacterium sp.	5.26e-05
B	OTU_191	2	Bacteria	Proteobacteria	Alphaproteobacteria	Rhizobiales	Phyllobacteriaceae	Mesorhizobium	AVBN_s	1.24e-06
B	OTU_194	119	Bacteria	Actinobacteria	Actinobacteria_c	Corynebacteriales	Nocardiaceae	Rhodococcus	Rhodococcus sp.	7.36e-05
B	OTU_196	94	Bacteria	Proteobacteria	Alphaproteobacteria	Rhizobiales	Hyphomicrobiaceae	Hyphomicrobium	JN869143_s	5.82e-05
B	OTU_2	9	Bacteria	Proteobacteria	Gammaproteobacteria	Pseudomonadales	Pseudomonadaceae	Pseudomonas	Pseudomonas sp.	5.57e-06
B	OTU_20	7	Bacteria	Proteobacteria	Betaproteobacteria	Burkholderiales	Comamonadaceae	EU978826_g	AY328716_s	4.33e-06
B	OTU_210	22	Bacteria	Proteobacteria	Alphaproteobacteria	Rhizobiales	Hyphomicrobiaceae	Hyphomicrobium	JN869143_s	1.36e-05
B	OTU_218	101	Bacteria	Proteobacteria	Gammaproteobacteria	Nevskiales	Sinobacteraceae	Nevskia	Nevskia_ramosa	6.25e-05
B	OTU_226	1377	Bacteria	Proteobacteria	Alphaproteobacteria	Sphingomonadales	Sphingomonadaceae	Sphingopyxis	Sphingopyxis sp.	0.000852001
B	OTU_228	8	Bacteria	Proteobacteria	Alphaproteobacteria	Rhodobacterales	Rhodobacteraceae	Rhodobaca	Rhodobaca_bogoriensis/Rhodobaca_barguzinensis/Roseinatronobacter_monicus	4.95e-06
B	OTU_237	25	Bacteria	Firmicutes	Bacilli	Bacillales	Staphylococcaceae	Staphylococcus	NA	1.55e-05
B	OTU_25	298	Bacteria	Proteobacteria	Betaproteobacteria	Burkholderiales	Comamonadaceae	Acidovorax	Acidovorax_defluvii	0.000184384
B	OTU_251	7	Bacteria	Proteobacteria	Alphaproteobacteria	Sphingomonadales	Sphingomonadaceae	Sphingobium	NA	4.33e-06
B	OTU_266	33	Bacteria	Proteobacteria	Betaproteobacteria	Burkholderiales	Oxalobacteraceae	Undibacterium	Undibacterium_oligocarboniphilum	2.04e-05
B	OTU_27	5	Bacteria	Proteobacteria	Alphaproteobacteria	Rhodobacterales	Hyphomonadaceae	CP012156_g	NA	3.09e-06
B	OTU_294	41	Bacteria	Proteobacteria	Alphaproteobacteria	Rhizobiales	Chelatococcaceae	Salinarimonas	Salinarimonas_rosea	2.54e-05
B	OTU_295	32	Bacteria	Firmicutes	Bacilli	Bacillales	Bacillaceae	NA	NA	1.98e-05
B	OTU_3	5511	Bacteria	Proteobacteria	Alphaproteobacteria	Rhizobiales	Hyphomicrobiaceae	Hyphomicrobium	AY569281_s	0.00340986
B	OTU_309	1493	Bacteria	Proteobacteria	Alphaproteobacteria	Sphingomonadales	Sphingomonadaceae	Blastomonas	Blastomonas_aquatica	0.000923774
B	OTU_32	3962	Bacteria	Proteobacteria	Alphaproteobacteria	Caulobacterales	Caulobacteraceae	Phenylobacterium	Phenylobacterium_haematophilum	0.00245144
B	OTU_328	11	Bacteria	Firmicutes	Bacilli	Bacillales	Bacillaceae	Bacillus_g6	Bacillus_pseudofirmus	6.81e-06
B	OTU_34	1	Bacteria	Proteobacteria	Gammaproteobacteria	Pseudomonadales	Pseudomonadaceae	Pseudomonas	Pseudomonas sp.	6.19e-07
B	OTU_359	59	Bacteria	Actinobacteria	Actinobacteria_c	Propionibacteriales	Nocardioidaceae	Nocardioides	Nocardioides_ginkgobilobae	3.65e-05
B	OTU_360	5	Eukarya	Streptophyta	eudicotyledons	core_eudicotyledons	NA	NA	NA	3.09e-06
B	OTU_376	2874	Bacteria	Proteobacteria	Alphaproteobacteria	Rhizobiales	Hyphomicrobiaceae	Hyphomicrobium	JN869143_s	0.00177825
B	OTU_4	424	Bacteria	Proteobacteria	Alphaproteobacteria	Sphingomonadales	Sphingomonadaceae	Sphingobium	Sphingobium_xenophagum/JEMV_s	0.000262344
B	OTU_41	368	Bacteria	Proteobacteria	Alphaproteobacteria	Sphingomonadales	Sphingomonadaceae	Sphingomonas	NA	0.000227695
B	OTU_412	24	Bacteria	Proteobacteria	Alphaproteobacteria	Sphingomonadales	Sphingomonadaceae	Sphingopyxis	Sphingopyxis sp.	1.48e-05
B	OTU_44	1	Bacteria	Bacteroidetes	Flavobacteria	Flavobacteriales	Flavobacteriaceae	Flavobacterium	Flavobacterium_granuli	6.19e-07
B	OTU_448	19	Bacteria	Cyanobacteria	JQ650114_c	JQ650114_o	JQ650114_f	FJ236035_g	FJ236035_s	1.18e-05
B	OTU_49	4	Bacteria	Cyanobacteria	JQ650114_c	JQ650114_o	JQ650114_f	JQ650114_g	GQ389121_s	2.47e-06
B	OTU_5	246	Bacteria	Proteobacteria	Alphaproteobacteria	Sphingomonadales	Sphingomonadaceae	Novosphingobium	NA	0.000152209
B	OTU_502	49	Bacteria	Firmicutes	Bacilli	Lactobacillales	Streptococcaceae	Streptococcus	Streptococcus sp.	3.03e-05
B	OTU_56	311	Bacteria	Proteobacteria	Alphaproteobacteria	Rhizobiales	Rhizobiaceae	Rhizobium	Rhizobium_nepotum/Rhizobium_radiobacter/CP002249_s	0.000192427
B	OTU_577	88	Bacteria	Proteobacteria	Betaproteobacteria	Burkholderiales	Oxalobacteraceae	Massilia	NA	5.44e-05
B	OTU_578	36	Bacteria	Actinobacteria	Nitriliruptoria	Nitriliruptorales	Nitriliruptoraceae	Nitriliruptor	DQ432396_s	2.23e-05
B	OTU_61	603	Bacteria	Proteobacteria	Gammaproteobacteria	Xanthomonadales	Xanthomonadaceae	Stenotrophomonas	NA	0.000373098
B	OTU_618	177	Bacteria	Proteobacteria	Alphaproteobacteria	Caulobacterales	Caulobacteraceae	Brevundimonas	Brevundimonas_mediterranea	0.000109516
B	OTU_629	34	Bacteria	Proteobacteria	Alphaproteobacteria	Rhodobacterales	Hyphomonadaceae	FJ439862_g	FJ439862_s	2.1e-05
B	OTU_639	6	Bacteria	Actinobacteria	Actinobacteria_c	Propionibacteriales	Propionibacteriaceae	Propionibacterium	Propionibacterium_acnes	3.71e-06
B	OTU_64	31	Bacteria	Proteobacteria	Alphaproteobacteria	Rhizobiales	Bradyrhizobiaceae	Bradyrhizobium	Bradyrhizobium sp.	1.92e-05
B	OTU_66	523	Bacteria	Proteobacteria	Betaproteobacteria	Burkholderiales	Comamonadaceae	Polaromonas	CP000316_s/AKIV_s	0.000323599
B	OTU_69	1428	Bacteria	Bacteroidetes	Sphingobacteriia	Sphingobacteriales	Sphingobacteriaceae	Pedobacter	Pedobacter_lotistagni	0.000883556
B	OTU_691	21	Bacteria	Proteobacteria	Alphaproteobacteria	Sphingomonadales	Sphingomonadaceae	Sphingomonas	JF459933_s	1.3e-05
B	OTU_695	5	Bacteria	Proteobacteria	Alphaproteobacteria	Caulobacterales	Caulobacteraceae	Brevundimonas	Brevundimonas_vancanneytii/Brevundimonas_naejangsanensis	3.09e-06
B	OTU_7	301857	Bacteria	Bacteroidetes	Flavobacteria	Flavobacteriales	Flavobacteriaceae	Flavobacterium	NA	0.18677
B	OTU_72	849	Eukarya	Bacillariophyta	FJ382328_c	FJ382328_o	FJ382328_f	FJ382328_g	FJ382328_s	0.000525308
B	OTU_778	92	Bacteria	Firmicutes	Bacilli	Bacillales	Bacillaceae	Caldalkalibacillus	Bacillus_mannanilyticus	5.69e-05
B	OTU_783	4	Bacteria	Bacteroidetes	Flavobacteria	Flavobacteriales	Flavobacteriaceae	Flavobacterium	NA	2.47e-06
B	OTU_786	18	Bacteria	Parcubacteria_OD1	Paceibacter_c	CP011215_o	CP011215_f	NA	NA	1.11e-05
B	OTU_787	1	Bacteria	Proteobacteria	Alphaproteobacteria	Sphingomonadales	Sphingomonadaceae	Novosphingobium	NA	6.19e-07
B	OTU_789	2426	Bacteria	Proteobacteria	Gammaproteobacteria	Pseudomonadales	Moraxellaceae	Acinetobacter	NA	0.00150106
B	OTU_79	54	Bacteria	Proteobacteria	Betaproteobacteria	Burkholderiales	Oxalobacteraceae	Undibacterium	Undibacterium_parvum	3.34e-05
B	OTU_8	26	Bacteria	Proteobacteria	Alphaproteobacteria	Sphingomonadales	Sphingomonadaceae	Sphingomonas	Sphingomonas_histidinilytica	1.61e-05
B	OTU_801	4	Bacteria	Proteobacteria	Gammaproteobacteria	Pseudomonadales	Pseudomonadaceae	Pseudomonas	Pseudomonas sp.	2.47e-06
B	OTU_820	509	Bacteria	Proteobacteria	Betaproteobacteria	Burkholderiales	Comamonadaceae	Variovorax	Variovorax_ginsengisoli	0.000314937
B	OTU_86	53	Bacteria	Proteobacteria	Gammaproteobacteria	Xanthomonadales	Xanthomonadaceae	Pseudoxanthomonas	Pseudoxanthomonas_mexicana	3.28e-05
B	OTU_9	3259	Bacteria	Proteobacteria	Alphaproteobacteria	Rhodobacterales	Hyphomonadaceae	CP012156_g	NA	0.00201646
B	OTU_91	330	Eukarya	Bacillariophyta	FJ382328_c	FJ382328_o	FJ382328_f	FJ382328_g	FJ382188_s	0.000204183
B	OTU_94	16	Bacteria	Actinobacteria	Actinobacteria_c	Corynebacteriales	Mycobacteriaceae	Mycobacterium	NA	9.9e-06
B	OTU_951	170	Bacteria	Proteobacteria	Gammaproteobacteria	Pseudomonadales	Pseudomonadaceae	Pseudomonas	Pseudomonas_aeruginosa	0.000105185
B	OTU_952	109	Bacteria	Firmicutes	Clostridia	Thermoanaerobacterales	Symbiobacteriaceae	Symbiobacterium	NA	6.74e-05
B	OTU_954	13	Bacteria	Bacteroidetes	Sphingobacteriia	HQ178786_o	HQ178786_f	EF520590_g	EF515896_s	8.04e-06
B	OTU_957	5	Bacteria	Proteobacteria	Alphaproteobacteria	Caulobacterales	Caulobacteraceae	Brevundimonas	Brevundimonas_mediterranea	3.09e-06
B	OTU_959	13	Bacteria	Proteobacteria	Alphaproteobacteria	Caulobacterales	Caulobacteraceae	Caulobacter	Caulobacter sp.	8.04e-06
B	OTU_961	75	Bacteria	Proteobacteria	Gammaproteobacteria	Pseudomonadales	Pseudomonadaceae	Pseudomonas	NA	4.64e-05
B	OTU_964	46	Bacteria	Proteobacteria	Alphaproteobacteria	Sphingomonadales	Sphingomonadaceae	Sphingobium	Sphingobium_limneticum	2.85e-05
C	OTU_1	444398	Bacteria	Proteobacteria	Gammaproteobacteria	Pseudomonadales	Pseudomonadaceae	Pseudomonas	Pseudomonas sp.	0.284011
C	OTU_10	1496	Bacteria	Proteobacteria	Alphaproteobacteria	Rhizobiales	Phreatobacter_f	Phreatobacter	DQ088783_s	0.000956082
C	OTU_1074	15	Bacteria	Proteobacteria	Betaproteobacteria	Burkholderiales	Oxalobacteraceae	Massilia	NA	9.59e-06
C	OTU_111	32	Bacteria	Proteobacteria	Alphaproteobacteria	Rhizobiales	Hyphomicrobiaceae	Hyphomicrobium	DQ814766_s	2.05e-05
C	OTU_1121	83	Bacteria	Proteobacteria	Gammaproteobacteria	Legionellales	Legionellaceae	Fluoribacter	Fluoribacter_gormanii	5.3e-05
C	OTU_1158	20	Bacteria	Proteobacteria	Alphaproteobacteria	Caulobacterales	Caulobacteraceae	Brevundimonas	Brevundimonas_halotolerans	1.28e-05
C	OTU_12	90018	Bacteria	Proteobacteria	Alphaproteobacteria	Sphingomonadales	Sphingomonadaceae	Sphingorhabdus	NA	0.0575298
C	OTU_124	34	Bacteria	Proteobacteria	Betaproteobacteria	Burkholderiales	Comamonadaceae	Delftia	Delftia_acidovorans	2.17e-05
C	OTU_125	43	Bacteria	Proteobacteria	Betaproteobacteria	Burkholderiales	Oxalobacteraceae	Massilia	Massilia_aurea	2.75e-05
C	OTU_131	976	Bacteria	Bacteroidetes	Cytophagia	Cytophagales	Cytophagaceae	GU454944_g	JQ684161_s	0.000623754
C	OTU_135	158	Bacteria	Proteobacteria	Alphaproteobacteria	Rhizobiales	Hyphomicrobiaceae	Hyphomicrobium	NA	0.000100977
C	OTU_139	3	Bacteria	Proteobacteria	Alphaproteobacteria	Rickettsiales	Paracaedibacteraceae	AY328755_g	AY328755_s	1.92e-06
C	OTU_151	253	Bacteria	Bacteroidetes	Sphingobacteriia	Sphingobacteriales	Sphingobacteriaceae	Pedobacter	Pedobacter_panaciterrae	0.00016169
C	OTU_157	89	Bacteria	Chlamydiae	Chlamydiae_c	Chlamydiales	Parachlamydiaceae	NA	NA	5.69e-05
C	OTU_160	99	Bacteria	Firmicutes	Bacilli	Bacillales	Planococcaceae	Lysinibacillus	Lysinibacillus_sphaericus/Lysinibacillus_fusiformis/Lysinibacillus_mangiferihumi	6.33e-05
C	OTU_171	308	Bacteria	Bacteroidetes	Sphingobacteriia	Sphingobacteriales	Chitinophagaceae	Sediminibacterium	Sediminibacterium_goheungense	0.00019684
C	OTU_175	23	Bacteria	Bacteroidetes	Sphingobacteriia	Sphingobacteriales	Sphingobacteriaceae	Pedobacter_g3	Pedobacter_luteus	1.47e-05
C	OTU_176	25	Bacteria	Bacteroidetes	Sphingobacteriia	Sphingobacteriales	Sphingobacteriaceae	Pedobacter_g3	Pedobacter_tournemirensis	1.6e-05
C	OTU_178	54	Bacteria	Proteobacteria	Alphaproteobacteria	Sphingomonadales	Sphingomonadaceae	Sphingorhabdus	JX949388_s	3.45e-05
C	OTU_180	5	Bacteria	Proteobacteria	Alphaproteobacteria	Rickettsiales	Paracaedibacteraceae	Captivus	JQ770028_s	3.2e-06
C	OTU_182	17	Bacteria	Saccharibacteria_TM7	Saccharimonas_c	Saccharimonas_o	Saccharimonas_f	Saccharimonas	AB511004_s	1.09e-05
C	OTU_186	4	Bacteria	Proteobacteria	Alphaproteobacteria	Rhizobiales	Methylobacteriaceae	Methylobacterium	Methylobacterium sp.	2.56e-06
C	OTU_19	435	Bacteria	Proteobacteria	Betaproteobacteria	Burkholderiales	Comamonadaceae	Rhizobacter	NA	0.000278005
C	OTU_191	10	Bacteria	Proteobacteria	Alphaproteobacteria	Rhizobiales	Phyllobacteriaceae	Mesorhizobium	AVBN_s	6.39e-06
C	OTU_194	94	Bacteria	Actinobacteria	Actinobacteria_c	Corynebacteriales	Nocardiaceae	Rhodococcus	Rhodococcus sp.	6.01e-05
C	OTU_196	1347	Bacteria	Proteobacteria	Alphaproteobacteria	Rhizobiales	Hyphomicrobiaceae	Hyphomicrobium	JN869143_s	0.000860857
C	OTU_2	7977	Bacteria	Proteobacteria	Gammaproteobacteria	Pseudomonadales	Pseudomonadaceae	Pseudomonas	Pseudomonas sp.	0.00509804
C	OTU_20	12978	Bacteria	Proteobacteria	Betaproteobacteria	Burkholderiales	Comamonadaceae	EU978826_g	AY328716_s	0.00829414
C	OTU_204	254	Eukarya	Bacillariophyta	FJ382328_c	FJ382328_o	FJ382328_f	FJ382328_g	FJ382188_s	0.000162329
C	OTU_210	282	Bacteria	Proteobacteria	Alphaproteobacteria	Rhizobiales	Hyphomicrobiaceae	Hyphomicrobium	JN869143_s	0.000180224
C	OTU_217	50	Bacteria	Bacteroidetes	Flavobacteria	Flavobacteriales	Flavobacteriaceae	Flavobacterium	Flavobacterium_lindanitolerans	3.2e-05
C	OTU_218	449	Bacteria	Proteobacteria	Gammaproteobacteria	Nevskiales	Sinobacteraceae	Nevskia	Nevskia_ramosa	0.000286952
C	OTU_224	50	Bacteria	Acidobacteria	Blastocatellia	Blastocatellales	Blastocatellaceae	Aridibacter	Aridibacter_famidurans	3.2e-05
C	OTU_226	488	Bacteria	Proteobacteria	Alphaproteobacteria	Sphingomonadales	Sphingomonadaceae	Sphingopyxis	Sphingopyxis sp.	0.000311877
C	OTU_227	239	Bacteria	Proteobacteria	Betaproteobacteria	Burkholderiales	Comamonadaceae	Acidovorax	NA	0.000152743
C	OTU_237	61	Bacteria	Firmicutes	Bacilli	Bacillales	Staphylococcaceae	Staphylococcus	NA	3.9e-05
C	OTU_25	798	Bacteria	Proteobacteria	Betaproteobacteria	Burkholderiales	Comamonadaceae	Acidovorax	Acidovorax_defluvii	0.000509995
C	OTU_261	3065	Bacteria	Bacteroidetes	Flavobacteria	Flavobacteriales	Flavobacteriaceae	Flavobacterium	Flavobacterium_reichenbachii	0.00195882
C	OTU_265	193	Bacteria	Bacteroidetes	Sphingobacteriia	Sphingobacteriales	Sphingobacteriaceae	Pedobacter	FJ192729_s	0.000123345
C	OTU_27	2921	Bacteria	Proteobacteria	Alphaproteobacteria	Rhodobacterales	Hyphomonadaceae	CP012156_g	NA	0.00186679
C	OTU_272	119	Bacteria	Bacteroidetes	Cytophagia	Cytophagales	Cytophagaceae	Dyadobacter	Dyadobacter_beijingensis	7.61e-05
C	OTU_294	32	Bacteria	Proteobacteria	Alphaproteobacteria	Rhizobiales	Chelatococcaceae	Salinarimonas	Salinarimonas_rosea	2.05e-05
C	OTU_295	13	Bacteria	Firmicutes	Bacilli	Bacillales	Bacillaceae	NA	NA	8.31e-06
C	OTU_3	841331	Bacteria	Proteobacteria	Alphaproteobacteria	Rhizobiales	Hyphomicrobiaceae	Hyphomicrobium	AY569281_s	0.537688
C	OTU_300	84	Bacteria	Firmicutes	Tissierellia	Tissierellales	Peptoniphilaceae	Finegoldia	Finegoldia_magna	5.37e-05
C	OTU_309	881	Bacteria	Proteobacteria	Alphaproteobacteria	Sphingomonadales	Sphingomonadaceae	Blastomonas	Blastomonas_aquatica	0.00056304
C	OTU_311	50	Bacteria	Proteobacteria	Gammaproteobacteria	Legionellales	Legionellaceae	Legionella	Legionella_lytica	3.2e-05
C	OTU_32	188	Bacteria	Proteobacteria	Alphaproteobacteria	Caulobacterales	Caulobacteraceae	Phenylobacterium	Phenylobacterium_haematophilum	0.000120149
C	OTU_328	1	Bacteria	Firmicutes	Bacilli	Bacillales	Bacillaceae	Bacillus_g6	Bacillus_pseudofirmus	6.39e-07
C	OTU_34	5862	Bacteria	Proteobacteria	Gammaproteobacteria	Pseudomonadales	Pseudomonadaceae	Pseudomonas	Pseudomonas sp.	0.00374636
C	OTU_346	58	Bacteria	Proteobacteria	Alphaproteobacteria	Rickettsiales	Rickettsiaceae	Rickettsia	Rickettsia sp.	3.71e-05
C	OTU_358	63	Bacteria	Proteobacteria	Alphaproteobacteria	Rickettsiales	Paracaedibacteraceae	Paracaedibacter	Odyssella_thessalonicensis	4.03e-05
C	OTU_376	21780	Bacteria	Proteobacteria	Alphaproteobacteria	Rhizobiales	Hyphomicrobiaceae	Hyphomicrobium	JN869143_s	0.0139194
C	OTU_378	30	Eukarya	Chlorophyta	Chlorophyceae	Sphaeropleales	Scenedesmaceae	Scenedesmus	NA	1.92e-05
C	OTU_385	95	Bacteria	Chlamydiae	Chlamydiae_c	Chlamydiales	Parachlamydiaceae	Parachlamydia	FCNU_s	6.07e-05
C	OTU_4	56	Bacteria	Proteobacteria	Alphaproteobacteria	Sphingomonadales	Sphingomonadaceae	Sphingobium	Sphingobium_xenophagum/JEMV_s	3.58e-05
C	OTU_404	2	Bacteria	Proteobacteria	Deltaproteobacteria	Bdellovibrionales	Bacteriovoracaceae	Peredibacter	Peredibacter_starrii	1.28e-06
C	OTU_41	1127	Bacteria	Proteobacteria	Alphaproteobacteria	Sphingomonadales	Sphingomonadaceae	Sphingomonas	NA	0.000720257
C	OTU_412	5	Bacteria	Proteobacteria	Alphaproteobacteria	Sphingomonadales	Sphingomonadaceae	Sphingopyxis	Sphingopyxis sp.	3.2e-06
C	OTU_44	5767	Bacteria	Bacteroidetes	Flavobacteria	Flavobacteriales	Flavobacteriaceae	Flavobacterium	Flavobacterium_granuli	0.00368564
C	OTU_48	13	Bacteria	Proteobacteria	Betaproteobacteria	Burkholderiales	Oxalobacteraceae	Noviherbaspirillum	Noviherbaspirillum_suwonense	8.31e-06
C	OTU_49	1105	Bacteria	Cyanobacteria	JQ650114_c	JQ650114_o	JQ650114_f	JQ650114_g	GQ389121_s	0.000706197
C	OTU_5	3	Bacteria	Proteobacteria	Alphaproteobacteria	Sphingomonadales	Sphingomonadaceae	Novosphingobium	NA	1.92e-06
C	OTU_532	9	Bacteria	Actinobacteria	Actinobacteria_c	Corynebacteriales	Corynebacteriaceae	Corynebacterium	Corynebacterium_tuberculostearicum	5.75e-06
C	OTU_537	29	Bacteria	Proteobacteria	Alphaproteobacteria	Rickettsiales	Rickettsiaceae	NA	NA	1.85e-05
C	OTU_538	27	Bacteria	Spirochaetes	Spirochaetes_c	Spirochaetales	Leptospiraceae	Leptospira	Leptospira sp.	1.73e-05
C	OTU_539	33	Bacteria	Bacteroidetes	Flavobacteria	Flavobacteriales	Flavobacteriaceae	Flavobacterium	NA	2.11e-05
C	OTU_541	46	Bacteria	Proteobacteria	Betaproteobacteria	Burkholderiales	Oxalobacteraceae	Herbaspirillum	LMHZ_s	2.94e-05
C	OTU_55	143	Bacteria	Saccharibacteria_TM7	Saccharimonas_c	Saccharimonas_o	Saccharimonas_f	Saccharimonas	FJ629383_s	9.14e-05
C	OTU_56	111	Bacteria	Proteobacteria	Alphaproteobacteria	Rhizobiales	Rhizobiaceae	Rhizobium	Rhizobium_nepotum/Rhizobium_radiobacter/CP002249_s	7.09e-05
C	OTU_577	3	Bacteria	Proteobacteria	Betaproteobacteria	Burkholderiales	Oxalobacteraceae	Massilia	NA	1.92e-06
C	OTU_579	91	Bacteria	Proteobacteria	Gammaproteobacteria	Legionellales	Legionellaceae	Legionella	NA	5.82e-05
C	OTU_59	2508	Bacteria	Proteobacteria	Gammaproteobacteria	Alteromonadales	Alishewanella_f	Rheinheimera	Rheinheimera_hassiensis	0.00160284
C	OTU_598	769	Bacteria	Proteobacteria	Betaproteobacteria	Burkholderiales	Oxalobacteraceae	Massilia	NA	0.000491462
C	OTU_6	676	Bacteria	Proteobacteria	Gammaproteobacteria	Pseudomonadales	Pseudomonadaceae	Pseudomonas	Pseudomonas_peli	0.000432026
C	OTU_60	640	Bacteria	Proteobacteria	Betaproteobacteria	Burkholderiales	Comamonadaceae	Aquabacterium	NA	0.000409019
C	OTU_605	2190	Bacteria	Proteobacteria	Alphaproteobacteria	Sphingomonadales	Sphingomonadaceae	Sphingopyxis	Sphingopyxis_witflariensis	0.00139961
C	OTU_61	2563	Bacteria	Proteobacteria	Gammaproteobacteria	Xanthomonadales	Xanthomonadaceae	Stenotrophomonas	NA	0.00163799
C	OTU_618	19	Bacteria	Proteobacteria	Alphaproteobacteria	Caulobacterales	Caulobacteraceae	Brevundimonas	Brevundimonas_mediterranea	1.21e-05
C	OTU_625	94	Bacteria	Proteobacteria	Alphaproteobacteria	Sphingomonadales	Sphingomonadaceae	Sphingorhabdus	Sphingopyxis_contaminans	6.01e-05
C	OTU_628	24	Bacteria	Bacteroidetes	Flavobacteria	Flavobacteriales	Flavobacteriaceae	Capnocytophaga	Capnocytophaga_sputigena	1.53e-05
C	OTU_630	62	Bacteria	Proteobacteria	Gammaproteobacteria	Legionellales	Coxiellaceae	NA	NA	3.96e-05
C	OTU_64	59	Bacteria	Proteobacteria	Alphaproteobacteria	Rhizobiales	Bradyrhizobiaceae	Bradyrhizobium	Bradyrhizobium sp.	3.77e-05
C	OTU_655	11128	Bacteria	Proteobacteria	Gammaproteobacteria	Pseudomonadales	Pseudomonadaceae	Pseudomonas	Pseudomonas sp.	0.00711182
C	OTU_66	5	Bacteria	Proteobacteria	Betaproteobacteria	Burkholderiales	Comamonadaceae	Polaromonas	CP000316_s/AKIV_s	3.2e-06
C	OTU_666	19	Bacteria	Proteobacteria	Betaproteobacteria	Burkholderiales	Comamonadaceae	NA	NA	1.21e-05
C	OTU_691	15	Bacteria	Proteobacteria	Alphaproteobacteria	Sphingomonadales	Sphingomonadaceae	Sphingomonas	JF459933_s	9.59e-06
C	OTU_692	36	Bacteria	Bacteroidetes	Sphingobacteriia	Sphingobacteriales	Sphingobacteriaceae	Sphingobacterium	Sphingobacterium_multivorum	2.3e-05
C	OTU_694	36	Bacteria	Proteobacteria	Alphaproteobacteria	Parvularculales	Parvularculaceae	AY625139_g	HQ697538_s	2.3e-05
C	OTU_695	8	Bacteria	Proteobacteria	Alphaproteobacteria	Caulobacterales	Caulobacteraceae	Brevundimonas	Brevundimonas_vancanneytii/Brevundimonas_naejangsanensis	5.11e-06
C	OTU_7	25	Bacteria	Bacteroidetes	Flavobacteria	Flavobacteriales	Flavobacteriaceae	Flavobacterium	NA	1.6e-05
C	OTU_71	81	Bacteria	Proteobacteria	Betaproteobacteria	Burkholderiales	Comamonadaceae	Methylibium	Methylibium_petroleiphilum	5.18e-05
C	OTU_72	1097	Eukarya	Bacillariophyta	FJ382328_c	FJ382328_o	FJ382328_f	FJ382328_g	FJ382328_s	0.000701084
C	OTU_75	25	Bacteria	Proteobacteria	Alphaproteobacteria	Rhodospirillales	AY957891_f	AY957891_g	NA	1.6e-05
C	OTU_779	46	Bacteria	Proteobacteria	Betaproteobacteria	Rhodocyclales	Rhodocyclaceae	Azospira	Azospira_oryzae	2.94e-05
C	OTU_780	52	Bacteria	Proteobacteria	Alphaproteobacteria	Sphingomonadales	Sphingomonadaceae	Sphingobium	Sphingobium_fontiphilum	3.32e-05
C	OTU_782	40	Bacteria	Actinobacteria	Actinobacteria_c	Micrococcales	Micrococcaceae	Kocuria	Kocuria_kristinae	2.56e-05
C	OTU_785	199	Bacteria	Proteobacteria	Betaproteobacteria	Burkholderiales	Oxalobacteraceae	Noviherbaspirillum	NA	0.000127179
C	OTU_787	369	Bacteria	Proteobacteria	Alphaproteobacteria	Sphingomonadales	Sphingomonadaceae	Novosphingobium	NA	0.000235825
C	OTU_788	11	Bacteria	Proteobacteria	Betaproteobacteria	Burkholderiales	Comamonadaceae	JN679217_g	NA	7.03e-06
C	OTU_79	28	Bacteria	Proteobacteria	Betaproteobacteria	Burkholderiales	Oxalobacteraceae	Undibacterium	Undibacterium_parvum	1.79e-05
C	OTU_8	211	Bacteria	Proteobacteria	Alphaproteobacteria	Sphingomonadales	Sphingomonadaceae	Sphingomonas	Sphingomonas_histidinilytica	0.000134848
C	OTU_80	1705	Bacteria	Planctomycetes	Phycisphaerae	Phycisphaerales	Phycisphaeraceae	FJ572037_g	NA	0.00108965
C	OTU_807	11	Bacteria	Proteobacteria	Alphaproteobacteria	Rhizobiales	Hyphomicrobiaceae	Hyphomicrobium	GQ500796_s	7.03e-06
C	OTU_820	490	Bacteria	Proteobacteria	Betaproteobacteria	Burkholderiales	Comamonadaceae	Variovorax	Variovorax_ginsengisoli	0.000313155
C	OTU_829	3	Bacteria	Bacteroidetes	Sphingobacteriia	Sphingobacteriales	Chitinophagaceae	EU104210_g	NA	1.92e-06
C	OTU_86	88	Bacteria	Proteobacteria	Gammaproteobacteria	Xanthomonadales	Xanthomonadaceae	Pseudoxanthomonas	Pseudoxanthomonas_mexicana	5.62e-05
C	OTU_881	1	Bacteria	Actinobacteria	Actinobacteria_c	Corynebacteriales	Mycobacteriaceae	Mycobacterium	Mycobacterium sp.	6.39e-07
C	OTU_89	3	Bacteria	Proteobacteria	Gammaproteobacteria	Legionellales	Legionellaceae	Legionella	JQ923995_s	1.92e-06
C	OTU_893	2	Bacteria	Proteobacteria	Betaproteobacteria	Rhodocyclales	Rhodocyclaceae	Azospira	AY691423_s	1.28e-06
C	OTU_9	88189	Bacteria	Proteobacteria	Alphaproteobacteria	Rhodobacterales	Hyphomonadaceae	CP012156_g	NA	0.0563609
C	OTU_91	692	Eukarya	Bacillariophyta	FJ382328_c	FJ382328_o	FJ382328_f	FJ382328_g	FJ382188_s	0.000442252
C	OTU_93	1307	Bacteria	Proteobacteria	Alphaproteobacteria	Sphingomonadales	Erythrobacteraceae	Porphyrobacter	Porphyrobacter_sanguineus	0.000835293
C	OTU_94	26	Bacteria	Actinobacteria	Actinobacteria_c	Corynebacteriales	Mycobacteriaceae	Mycobacterium	NA	1.66e-05
C	OTU_948	12	Bacteria	Proteobacteria	Alphaproteobacteria	Rhizobiales	Hyphomicrobiaceae	Hyphomicrobium	JN869143_s	7.67e-06
C	OTU_950	21	Bacteria	Proteobacteria	Gammaproteobacteria	Legionellales	Legionellaceae	Legionella	NA	1.34e-05
C	OTU_951	19	Bacteria	Proteobacteria	Gammaproteobacteria	Pseudomonadales	Pseudomonadaceae	Pseudomonas	Pseudomonas_aeruginosa	1.21e-05
C	OTU_953	11	Bacteria	Firmicutes	Clostridia	Clostridiales	Peptococcaceae	FN563399_g	FN563399_s	7.03e-06
C	OTU_955	1	Bacteria	Proteobacteria	Alphaproteobacteria	Rhizobiales	Phreatobacter_f	Phreatobacter	DQ088783_s	6.39e-07
C	OTU_959	8	Bacteria	Proteobacteria	Alphaproteobacteria	Caulobacterales	Caulobacteraceae	Caulobacter	Caulobacter sp.	5.11e-06
C	OTU_961	9	Bacteria	Proteobacteria	Gammaproteobacteria	Pseudomonadales	Pseudomonadaceae	Pseudomonas	NA	5.75e-06
C	OTU_963	15	Bacteria	Proteobacteria	Alphaproteobacteria	Caulobacterales	Caulobacteraceae	Phenylobacterium	NA	9.59e-06
C	OTU_964	1	Bacteria	Proteobacteria	Alphaproteobacteria	Sphingomonadales	Sphingomonadaceae	Sphingobium	Sphingobium_limneticum	6.39e-07
C	OTU_965	30	Bacteria	Proteobacteria	Alphaproteobacteria	Rhizobiales	Hyphomicrobiaceae	Hyphomicrobium	AY569281_s	1.92e-05
C	OTU_966	14	Bacteria	Proteobacteria	Alphaproteobacteria	Rhizobiales	Hyphomicrobiaceae	Hyphomicrobium	AY569281_s	8.95e-06
C	OTU_967	25	Bacteria	Planctomycetes	Planctomycetia	Planctomycetales	Gemmata_f	Gemmata	FJ478935_s	1.6e-05
C	OTU_983	1	Bacteria	Proteobacteria	Alphaproteobacteria	Sphingomonadales	Sphingomonadaceae	NA	NA	6.39e-07
D	OTU_1	329	Bacteria	Proteobacteria	Gammaproteobacteria	Pseudomonadales	Pseudomonadaceae	Pseudomonas	Pseudomonas sp.	0.000325742
D	OTU_10	95464	Bacteria	Proteobacteria	Alphaproteobacteria	Rhizobiales	Phreatobacter_f	Phreatobacter	DQ088783_s	0.0945187
D	OTU_103	4	Bacteria	Cyanobacteria	JQ650114_c	JQ650114_o	JQ650114_f	JQ650114_g	PAC000546_s	3.96e-06
D	OTU_111	8	Bacteria	Proteobacteria	Alphaproteobacteria	Rhizobiales	Hyphomicrobiaceae	Hyphomicrobium	DQ814766_s	7.92e-06
D	OTU_1138	3	Bacteria	Proteobacteria	Alphaproteobacteria	Sphingomonadales	Sphingomonadaceae	Sphingorhabdus	NA	2.97e-06
D	OTU_1158	7	Bacteria	Proteobacteria	Alphaproteobacteria	Caulobacterales	Caulobacteraceae	Brevundimonas	Brevundimonas_halotolerans	6.93e-06
D	OTU_12	45133	Bacteria	Proteobacteria	Alphaproteobacteria	Sphingomonadales	Sphingomonadaceae	Sphingorhabdus	NA	0.0446861
D	OTU_124	167	Bacteria	Proteobacteria	Betaproteobacteria	Burkholderiales	Comamonadaceae	Delftia	Delftia_acidovorans	0.000165346
D	OTU_135	474	Bacteria	Proteobacteria	Alphaproteobacteria	Rhizobiales	Hyphomicrobiaceae	Hyphomicrobium	NA	0.000469306
D	OTU_137	138	Bacteria	Proteobacteria	Alphaproteobacteria	Rhodospirillales	Rhodospirillaceae	Reyranella	Reyranella_massiliensis	0.000136634
D	OTU_145	1	Bacteria	Proteobacteria	Gammaproteobacteria	Enterobacteriales	Enterobacteriaceae	Escherichia	NA	9.9e-07
D	OTU_160	120	Bacteria	Firmicutes	Bacilli	Bacillales	Planococcaceae	Lysinibacillus	Lysinibacillus_sphaericus/Lysinibacillus_fusiformis/Lysinibacillus_mangiferihumi	0.000118812
D	OTU_164	86	Bacteria	Proteobacteria	Betaproteobacteria	Neisseriales	Neisseriaceae	FM873692_g	FM873692_s	8.51e-05
D	OTU_171	93	Bacteria	Bacteroidetes	Sphingobacteriia	Sphingobacteriales	Chitinophagaceae	Sediminibacterium	Sediminibacterium_goheungense	9.21e-05
D	OTU_175	334	Bacteria	Bacteroidetes	Sphingobacteriia	Sphingobacteriales	Sphingobacteriaceae	Pedobacter_g3	Pedobacter_luteus	0.000330693
D	OTU_176	80	Bacteria	Bacteroidetes	Sphingobacteriia	Sphingobacteriales	Sphingobacteriaceae	Pedobacter_g3	Pedobacter_tournemirensis	7.92e-05
D	OTU_186	32	Bacteria	Proteobacteria	Alphaproteobacteria	Rhizobiales	Methylobacteriaceae	Methylobacterium	Methylobacterium sp.	3.17e-05
D	OTU_19	1165	Bacteria	Proteobacteria	Betaproteobacteria	Burkholderiales	Comamonadaceae	Rhizobacter	NA	0.00115346
D	OTU_191	137	Bacteria	Proteobacteria	Alphaproteobacteria	Rhizobiales	Phyllobacteriaceae	Mesorhizobium	AVBN_s	0.000135643
D	OTU_196	129824	Bacteria	Proteobacteria	Alphaproteobacteria	Rhizobiales	Hyphomicrobiaceae	Hyphomicrobium	JN869143_s	0.128538
D	OTU_20	33521	Bacteria	Proteobacteria	Betaproteobacteria	Burkholderiales	Comamonadaceae	EU978826_g	AY328716_s	0.0331891
D	OTU_200	38	Bacteria	Proteobacteria	Deltaproteobacteria	Bdellovibrionales	Bacteriovoracaceae	Peredibacter	AB176175_s	3.76e-05
D	OTU_210	7137	Bacteria	Proteobacteria	Alphaproteobacteria	Rhizobiales	Hyphomicrobiaceae	Hyphomicrobium	JN869143_s	0.00706633
D	OTU_218	3	Bacteria	Proteobacteria	Gammaproteobacteria	Nevskiales	Sinobacteraceae	Nevskia	Nevskia_ramosa	2.97e-06
D	OTU_226	515	Bacteria	Proteobacteria	Alphaproteobacteria	Sphingomonadales	Sphingomonadaceae	Sphingopyxis	Sphingopyxis sp.	0.0005099
D	OTU_227	84	Bacteria	Proteobacteria	Betaproteobacteria	Burkholderiales	Comamonadaceae	Acidovorax	NA	8.32e-05
D	OTU_228	54	Bacteria	Proteobacteria	Alphaproteobacteria	Rhodobacterales	Rhodobacteraceae	Rhodobaca	Rhodobaca_bogoriensis/Rhodobaca_barguzinensis/Roseinatronobacter_monicus	5.35e-05
D	OTU_237	14	Bacteria	Firmicutes	Bacilli	Bacillales	Staphylococcaceae	Staphylococcus	NA	1.39e-05
D	OTU_25	107	Bacteria	Proteobacteria	Betaproteobacteria	Burkholderiales	Comamonadaceae	Acidovorax	Acidovorax_defluvii	0.00010594
D	OTU_268	137	Bacteria	Bacteroidetes	Flavobacteria	Flavobacteriales	Flavobacteriaceae	Flavobacterium	Flavobacterium_cheonhonense	0.000135643
D	OTU_27	10762	Bacteria	Proteobacteria	Alphaproteobacteria	Rhodobacterales	Hyphomonadaceae	CP012156_g	NA	0.0106554
D	OTU_3	515217	Bacteria	Proteobacteria	Alphaproteobacteria	Rhizobiales	Hyphomicrobiaceae	Hyphomicrobium	AY569281_s	0.510115
D	OTU_305	3	Bacteria	Proteobacteria	Alphaproteobacteria	Rhizobiales	Chelatococcaceae	HQ697793_g	HQ697793_s	2.97e-06
D	OTU_309	131	Bacteria	Proteobacteria	Alphaproteobacteria	Sphingomonadales	Sphingomonadaceae	Blastomonas	Blastomonas_aquatica	0.000129703
D	OTU_311	65	Bacteria	Proteobacteria	Gammaproteobacteria	Legionellales	Legionellaceae	Legionella	Legionella_lytica	6.44e-05
D	OTU_32	107	Bacteria	Proteobacteria	Alphaproteobacteria	Caulobacterales	Caulobacteraceae	Phenylobacterium	Phenylobacterium_haematophilum	0.00010594
D	OTU_328	57	Bacteria	Firmicutes	Bacilli	Bacillales	Bacillaceae	Bacillus_g6	Bacillus_pseudofirmus	5.64e-05
D	OTU_330	18	Bacteria	Proteobacteria	Alphaproteobacteria	Rhizobiales	Bradyrhizobiaceae	Bradyrhizobium	AZSJ_s	1.78e-05
D	OTU_347	26	Bacteria	Proteobacteria	Alphaproteobacteria	Rhodospirillales	AY957891_f	AY957891_g	JF048929_s	2.57e-05
D	OTU_348	1	Bacteria	Actinobacteria	Actinobacteria_c	Micrococcales	Microbacteriaceae	NA	NA	9.9e-07
D	OTU_373	7	Bacteria	Proteobacteria	Alphaproteobacteria	Rhodospirillales	Rhodospirillaceae	Reyranella	Reyranella_soli	6.93e-06
D	OTU_375	2	Bacteria	Actinobacteria	Actinobacteria_c	Frankiales	Geodermatophilaceae	Blastococcus	Blastococcus_aggregatus	1.98e-06
D	OTU_376	15980	Bacteria	Proteobacteria	Alphaproteobacteria	Rhizobiales	Hyphomicrobiaceae	Hyphomicrobium	JN869143_s	0.0158218
D	OTU_377	70	Bacteria	Bacteroidetes	Flavobacteria	Flavobacteriales	Flavobacteriaceae	Flavobacterium	AY212611_s	6.93e-05
D	OTU_378	55	Eukarya	Chlorophyta	Chlorophyceae	Sphaeropleales	Scenedesmaceae	Scenedesmus	NA	5.45e-05
D	OTU_38	13	Bacteria	Proteobacteria	Gammaproteobacteria	Chromatiales	NA	NA	NA	1.29e-05
D	OTU_384	127	Bacteria	Verrucomicrobia	Verrucomicrobiae	Verrucomicrobiales	Verrucomicrobiaceae	Prosthecobacter	Prosthecobacter_fluviatilis	0.000125742
D	OTU_391	109	Bacteria	Verrucomicrobia	Verrucomicrobiae	Verrucomicrobiales	Verrucomicrobiaceae	Prosthecobacter	JN090821_s	0.000107921
D	OTU_41	1167	Bacteria	Proteobacteria	Alphaproteobacteria	Sphingomonadales	Sphingomonadaceae	Sphingomonas	NA	0.00115544
D	OTU_412	12	Bacteria	Proteobacteria	Alphaproteobacteria	Sphingomonadales	Sphingomonadaceae	Sphingopyxis	Sphingopyxis sp.	1.19e-05
D	OTU_429	95	Bacteria	Proteobacteria	Alphaproteobacteria	Sphingomonadales	Sphingomonadaceae	Sphingoaurantiacus	Sphingoaurantiacus_polygranulatus	9.41e-05
D	OTU_430	76	Bacteria	Proteobacteria	Gammaproteobacteria	Legionellales	Legionellaceae	Legionella	NA	7.52e-05
D	OTU_445	14	Bacteria	Cyanobacteria	JF737898_c	GU174155_o	GU444060_f	GU444060_g	GQ480048_s	1.39e-05
D	OTU_475	46	Bacteria	Proteobacteria	Alphaproteobacteria	Rhodobacterales	Rhodobacteraceae	Rhodobacter	NA	4.55e-05
D	OTU_476	61	Bacteria	Proteobacteria	Betaproteobacteria	Burkholderiales	Ralstonia_f	Cupriavidus	ALOU_s	6.04e-05
D	OTU_49	4401	Bacteria	Cyanobacteria	JQ650114_c	JQ650114_o	JQ650114_f	JQ650114_g	GQ389121_s	0.00435742
D	OTU_5	4	Bacteria	Proteobacteria	Alphaproteobacteria	Sphingomonadales	Sphingomonadaceae	Novosphingobium	NA	3.96e-06
D	OTU_511	2	Bacteria	Firmicutes	Bacilli	Bacillales	Bacillaceae	Bacillus	Bacillus sp.	1.98e-06
D	OTU_531	2	Bacteria	Proteobacteria	Alphaproteobacteria	Caulobacterales	Caulobacteraceae	Brevundimonas	Brevundimonas_alba/Brevundimonas_denitrificans	1.98e-06
D	OTU_56	115	Bacteria	Proteobacteria	Alphaproteobacteria	Rhizobiales	Rhizobiaceae	Rhizobium	Rhizobium_nepotum/Rhizobium_radiobacter/CP002249_s	0.000113861
D	OTU_60	55	Bacteria	Proteobacteria	Betaproteobacteria	Burkholderiales	Comamonadaceae	Aquabacterium	NA	5.45e-05
D	OTU_605	565	Bacteria	Proteobacteria	Alphaproteobacteria	Sphingomonadales	Sphingomonadaceae	Sphingopyxis	Sphingopyxis_witflariensis	0.000559405
D	OTU_61	314	Bacteria	Proteobacteria	Gammaproteobacteria	Xanthomonadales	Xanthomonadaceae	Stenotrophomonas	NA	0.000310891
D	OTU_631	63	Bacteria	Proteobacteria	Oligoflexia	Oligoflexales	Oligoflexaceae	Oligoflexus	JF181808_s	6.24e-05
D	OTU_632	31	Bacteria	Proteobacteria	Betaproteobacteria	Rhodocyclales	Rhodocyclaceae	Zoogloea	Zoogloea_resiniphila	3.07e-05
D	OTU_639	1	Bacteria	Actinobacteria	Actinobacteria_c	Propionibacteriales	Propionibacteriaceae	Propionibacterium	Propionibacterium_acnes	9.9e-07
D	OTU_650	2	Bacteria	Chlamydiae	Chlamydiae_c	Chlamydiales	Parachlamydiaceae	NA	NA	1.98e-06
D	OTU_668	13	Bacteria	Planctomycetes	Planctomycetia	Planctomycetales	Gemmata_f	NA	NA	1.29e-05
D	OTU_69	406	Bacteria	Bacteroidetes	Sphingobacteriia	Sphingobacteriales	Sphingobacteriaceae	Pedobacter	Pedobacter_lotistagni	0.00040198
D	OTU_691	12	Bacteria	Proteobacteria	Alphaproteobacteria	Sphingomonadales	Sphingomonadaceae	Sphingomonas	JF459933_s	1.19e-05
D	OTU_693	51	Bacteria	Bacteroidetes	Flavobacteria	Flavobacteriales	Crocinitomicaceae	EU800805_g	EU801804_s	5.05e-05
D	OTU_694	490	Bacteria	Proteobacteria	Alphaproteobacteria	Parvularculales	Parvularculaceae	AY625139_g	HQ697538_s	0.000485148
D	OTU_7	157	Bacteria	Bacteroidetes	Flavobacteria	Flavobacteriales	Flavobacteriaceae	Flavobacterium	NA	0.000155445
D	OTU_710	2	Bacteria	Proteobacteria	Betaproteobacteria	Burkholderiales	Comamonadaceae	NA	NA	1.98e-06
D	OTU_72	728	Eukarya	Bacillariophyta	FJ382328_c	FJ382328_o	FJ382328_f	FJ382328_g	FJ382328_s	0.000720791
D	OTU_722	24	Bacteria	Planctomycetes	Planctomycetia	Planctomycetales	Gemmata_f	JF815519_g	EF018919_s	2.38e-05
D	OTU_73	32	Bacteria	Proteobacteria	Gammaproteobacteria	Nevskiales	Sinobacteraceae	Nevskia	Nevskia_ramosa	3.17e-05
D	OTU_75	1161	Bacteria	Proteobacteria	Alphaproteobacteria	Rhodospirillales	AY957891_f	AY957891_g	NA	0.0011495
D	OTU_755	21	Bacteria	Chlamydiae	Chlamydiae_c	Chlamydiales	Parachlamydiaceae	CCSC_g	CCSC_s	2.08e-05
D	OTU_784	69	Bacteria	Proteobacteria	Betaproteobacteria	Burkholderiales	Comamonadaceae	Ramlibacter	NA	6.83e-05
D	OTU_789	8	Bacteria	Proteobacteria	Gammaproteobacteria	Pseudomonadales	Moraxellaceae	Acinetobacter	NA	7.92e-06
D	OTU_79	20	Bacteria	Proteobacteria	Betaproteobacteria	Burkholderiales	Oxalobacteraceae	Undibacterium	Undibacterium_parvum	1.98e-05
D	OTU_8	23	Bacteria	Proteobacteria	Alphaproteobacteria	Sphingomonadales	Sphingomonadaceae	Sphingomonas	Sphingomonas_histidinilytica	2.28e-05
D	OTU_80	3168	Bacteria	Planctomycetes	Phycisphaerae	Phycisphaerales	Phycisphaeraceae	FJ572037_g	NA	0.00313663
D	OTU_807	19	Bacteria	Proteobacteria	Alphaproteobacteria	Rhizobiales	Hyphomicrobiaceae	Hyphomicrobium	GQ500796_s	1.88e-05
D	OTU_81	96	Bacteria	Proteobacteria	Alphaproteobacteria	Rhizobiales	Bosea_f	Bosea	Bosea_lathyri	9.5e-05
D	OTU_83	1	Bacteria	Proteobacteria	Alphaproteobacteria	Rhizobiales	Hyphomicrobiaceae	Hyphomicrobium	JN090780_s	9.9e-07
D	OTU_86	65	Bacteria	Proteobacteria	Gammaproteobacteria	Xanthomonadales	Xanthomonadaceae	Pseudoxanthomonas	Pseudoxanthomonas_mexicana	6.44e-05
D	OTU_9	137370	Bacteria	Proteobacteria	Alphaproteobacteria	Rhodobacterales	Hyphomonadaceae	CP012156_g	NA	0.13601
D	OTU_91	1	Eukarya	Bacillariophyta	FJ382328_c	FJ382328_o	FJ382328_f	FJ382328_g	FJ382188_s	9.9e-07
D	OTU_94	55	Bacteria	Actinobacteria	Actinobacteria_c	Corynebacteriales	Mycobacteriaceae	Mycobacterium	NA	5.45e-05
D	OTU_945	22	Bacteria	Acidobacteria	CP015136_c	CP015136_o	CP015136_f	Z95727_g	EU234305_s	2.18e-05
D	OTU_946	10	Bacteria	Bacteroidetes	Sphingobacteriia	HQ178786_o	HQ178786_f	DQ404664_g	JQ978573_s	9.9e-06
D	OTU_948	69	Bacteria	Proteobacteria	Alphaproteobacteria	Rhizobiales	Hyphomicrobiaceae	Hyphomicrobium	JN869143_s	6.83e-05
D	OTU_949	10	Bacteria	Proteobacteria	Betaproteobacteria	Burkholderiales	Oxalobacteraceae	Herminiimonas	Herminiimonas_contaminans	9.9e-06
D	OTU_951	58	Bacteria	Proteobacteria	Gammaproteobacteria	Pseudomonadales	Pseudomonadaceae	Pseudomonas	Pseudomonas_aeruginosa	5.74e-05
D	OTU_955	504	Bacteria	Proteobacteria	Alphaproteobacteria	Rhizobiales	Phreatobacter_f	Phreatobacter	DQ088783_s	0.000499009
D	OTU_956	9	Bacteria	Proteobacteria	Alphaproteobacteria	Rhizobiales	Bradyrhizobiaceae	Rhodopseudomonas	NA	8.91e-06
D	OTU_958	48	Bacteria	Proteobacteria	Alphaproteobacteria	Rhizobiales	Hyphomicrobiaceae	Hyphomicrobium	JN869143_s	4.75e-05
D	OTU_959	7	Bacteria	Proteobacteria	Alphaproteobacteria	Caulobacterales	Caulobacteraceae	Caulobacter	Caulobacter sp.	6.93e-06
D	OTU_962	25	Bacteria	Cyanobacteria	JQ650114_c	JQ650114_o	JQ650114_f	JQ650114_g	NA	2.48e-05
D	OTU_964	211	Bacteria	Proteobacteria	Alphaproteobacteria	Sphingomonadales	Sphingomonadaceae	Sphingobium	Sphingobium_limneticum	0.000208911
D	OTU_965	38	Bacteria	Proteobacteria	Alphaproteobacteria	Rhizobiales	Hyphomicrobiaceae	Hyphomicrobium	AY569281_s	3.76e-05
D	OTU_966	13	Bacteria	Proteobacteria	Alphaproteobacteria	Rhizobiales	Hyphomicrobiaceae	Hyphomicrobium	AY569281_s	1.29e-05
E	OTU_1	1296738	Bacteria	Proteobacteria	Gammaproteobacteria	Pseudomonadales	Pseudomonadaceae	Pseudomonas	Pseudomonas sp.	0.582926
E	OTU_10	1	Bacteria	Proteobacteria	Alphaproteobacteria	Rhizobiales	Phreatobacter_f	Phreatobacter	DQ088783_s	4.5e-07
E	OTU_1004	17	Bacteria	Proteobacteria	Alphaproteobacteria	Rhodobacterales	Rhodobacteraceae	NA	NA	7.64e-06
E	OTU_1014	4	Bacteria	Bacteroidetes	Bacteroidia	Bacteroidales	Bacteroidaceae	Bacteroides	NA	1.8e-06
E	OTU_102	1	Bacteria	Proteobacteria	Alphaproteobacteria	Rhodospirillales	Rhodospirillaceae	EU800921_g	EU800921_s	4.5e-07
E	OTU_1020	2	Bacteria	Proteobacteria	Betaproteobacteria	Burkholderiales	Comamonadaceae	Rhizobacter	Rhizobacter_bergeniae	8.99e-07
E	OTU_1028	6	Bacteria	Fusobacteria	Fusobacteria_c	Fusobacteriales	Leptotrichiaceae	Leptotrichia	AF385572_s	2.7e-06
E	OTU_1038	1	Bacteria	Proteobacteria	Deltaproteobacteria	FM253572_o	FM253572_f	FJ478897_g	AF234748_s	4.5e-07
E	OTU_104	2	Bacteria	Proteobacteria	Alphaproteobacteria	Rhizobiales	Bradyrhizobiaceae	Pseudorhodoplanes	FJ478588_s	8.99e-07
E	OTU_1045	1	Bacteria	Proteobacteria	Deltaproteobacteria	FM253572_o	FM253572_f	EU881241_g	EU881241_s	4.5e-07
E	OTU_1046	10	Bacteria	Proteobacteria	Betaproteobacteria	Burkholderiales	Oxalobacteraceae	Undibacterium	Undibacterium_seohonense	4.5e-06
E	OTU_1065	879	Bacteria	Proteobacteria	Alphaproteobacteria	Rhizobiales	Rhizobiaceae	Ensifer	Ensifer_morelensis	0.000395139
E	OTU_1070	5	Bacteria	Firmicutes	Clostridia	Clostridiales	Ruminococcaceae	KQ959578_g	AY958888_s	2.25e-06
E	OTU_11	36	Bacteria	Proteobacteria	Betaproteobacteria	Thiobacillus_o	Thiobacillus_f	Thiobacillus	Thiobacillus_thioparus	1.62e-05
E	OTU_1104	3	Bacteria	Bacteroidetes	Cytophagia	Cytophagales	Hymenobacteraceae	Hymenobacter	NA	1.35e-06
E	OTU_1109	2	Bacteria	Proteobacteria	Betaproteobacteria	Burkholderiales	Comamonadaceae	Rhizobacter	Rhizobacter_fulvus	8.99e-07
E	OTU_111	1	Bacteria	Proteobacteria	Alphaproteobacteria	Rhizobiales	Hyphomicrobiaceae	Hyphomicrobium	DQ814766_s	4.5e-07
E	OTU_1122	1531	Bacteria	Bacteroidetes	Flavobacteria	Flavobacteriales	Flavobacteriaceae	Flavobacterium	NA	0.000688234
E	OTU_1132	127	Bacteria	Bacteroidetes	Bacteroidia	Bacteroidales	Rikenellaceae	Alistipes	Alistipes_finegoldii	5.71e-05
E	OTU_1137	1	Bacteria	Bacteroidetes	Bacteroidia	Bacteroidales	Bacteroidaceae	Bacteroides	Bacteroides_fragilis	4.5e-07
E	OTU_114	384	Bacteria	Proteobacteria	Alphaproteobacteria	Caulobacterales	Caulobacteraceae	Brevundimonas	Brevundimonas_nasdae/Brevundimonas_albigilva/Brevundimonas_vesicularis	0.00017262
E	OTU_1155	8	Bacteria	Proteobacteria	Gammaproteobacteria	Pseudomonadales	Moraxellaceae	Moraxella	Moraxella_osloensis	3.6e-06
E	OTU_1158	44	Bacteria	Proteobacteria	Alphaproteobacteria	Caulobacterales	Caulobacteraceae	Brevundimonas	Brevundimonas_halotolerans	1.98e-05
E	OTU_1159	4	Bacteria	Cyanobacteria	Vampirovibrio_c	FR888536_o	FR888536_f	FR888536_g	FR888536_s	1.8e-06
E	OTU_118	1	Bacteria	Proteobacteria	Alphaproteobacteria	Rhodobacterales	Rhodobacteraceae	Gemmobacter	GQ396845_s	4.5e-07
E	OTU_1180	1	Bacteria	Chloroflexi	GQ396871_c	GQ396871_o	GQ396871_f	GQ396871_g	NA	4.5e-07
E	OTU_1188	3	Bacteria	Proteobacteria	Gammaproteobacteria	Pseudomonadales	Pseudomonadaceae	Pseudomonas	Pseudomonas_extremaustralis	1.35e-06
E	OTU_1189	2	Bacteria	Bacteroidetes	Bacteroidia	Bacteroidales	Odoribacteraceae	Odoribacter	Odoribacter_splanchnicus	8.99e-07
E	OTU_12	10	Bacteria	Proteobacteria	Alphaproteobacteria	Sphingomonadales	Sphingomonadaceae	Sphingorhabdus	NA	4.5e-06
E	OTU_120	36	Bacteria	Proteobacteria	Betaproteobacteria	Burkholderiales	Sutterellaceae	Sutterella	AY684426_s	1.62e-05
E	OTU_122	2	Bacteria	Proteobacteria	Gammaproteobacteria	Legionellales	Coxiellaceae	NA	NA	8.99e-07
E	OTU_124	299	Bacteria	Proteobacteria	Betaproteobacteria	Burkholderiales	Comamonadaceae	Delftia	Delftia_acidovorans	0.00013441
E	OTU_125	12	Bacteria	Proteobacteria	Betaproteobacteria	Burkholderiales	Oxalobacteraceae	Massilia	Massilia_aurea	5.39e-06
E	OTU_126	3	Bacteria	Proteobacteria	Betaproteobacteria	Sterolibacterium_o	Sterolibacterium_f	Methyloversatilis	Methyloversatilis_discipulorum	1.35e-06
E	OTU_129	1	Bacteria	Proteobacteria	Gammaproteobacteria	Acidiferrobacterales	Acidiferrobacteraceae	GQ397041_g	GQ397041_s	4.5e-07
E	OTU_13	72499	Bacteria	Proteobacteria	Gammaproteobacteria	Pseudomonadales	Moraxellaceae	Acinetobacter	Acinetobacter_harbinensis	0.0325906
E	OTU_136	2	Bacteria	Proteobacteria	Deltaproteobacteria	AF269002_o	AF269002_f	AF269002_g	AF269002_s	8.99e-07
E	OTU_138	88	Bacteria	Proteobacteria	Alphaproteobacteria	Rhizobiales	Parvibaculum_f	AF370880_g	GQ500752_s	3.96e-05
E	OTU_14	26	Bacteria	Cyanobacteria	JQ650114_c	JQ650114_o	JQ650114_f	JQ650114_g	AY375144_s	1.17e-05
E	OTU_145	474	Bacteria	Proteobacteria	Gammaproteobacteria	Enterobacteriales	Enterobacteriaceae	Escherichia	NA	0.000213078
E	OTU_146	1	Bacteria	Proteobacteria	Alphaproteobacteria	Rickettsiales	Holosporaceae	EU360475_g	EU360475_s	4.5e-07
E	OTU_15	20	Bacteria	Chlamydiae	Chlamydiae_c	Chlamydiales	Parachlamydiaceae	NA	NA	8.99e-06
E	OTU_16	7	Bacteria	Proteobacteria	Betaproteobacteria	Burkholderiales	Oxalobacteraceae	Massilia	Massilia_yuzhufengensis	3.15e-06
E	OTU_160	92	Bacteria	Firmicutes	Bacilli	Bacillales	Planococcaceae	Lysinibacillus	Lysinibacillus_sphaericus/Lysinibacillus_fusiformis/Lysinibacillus_mangiferihumi	4.14e-05
E	OTU_162	1	Bacteria	Acidobacteria	Blastocatellia	Blastocatellales	EU335275_f	EU335275_g	EF516020_s	4.5e-07
E	OTU_165	4	Bacteria	Actinobacteria	Actinobacteria_c	Corynebacteriales	Nocardiaceae	Rhodococcus	Rhodococcus_qingshengii/Rhodococcus_degradans/Rhodococcus_erythropolis	1.8e-06
E	OTU_166	23	Bacteria	Firmicutes	Clostridia	Clostridiales	Ruminococcaceae	Faecalibacterium	Faecalibacterium_prausnitzii	1.03e-05
E	OTU_167	382	Bacteria	Bacteroidetes	Bacteroidia	Bacteroidales	Prevotellaceae	Prevotella	NA	0.000171721
E	OTU_17	12	Bacteria	Proteobacteria	Alphaproteobacteria	Sphingomonadales	Sphingomonadaceae	EU580479_g	EU937899_s	5.39e-06
E	OTU_174	1	Bacteria	Proteobacteria	Gammaproteobacteria	Legionellales	Legionellaceae	Legionella	HM238165_s	4.5e-07
E	OTU_175	110	Bacteria	Bacteroidetes	Sphingobacteriia	Sphingobacteriales	Sphingobacteriaceae	Pedobacter_g3	Pedobacter_luteus	4.94e-05
E	OTU_18	7	Bacteria	Proteobacteria	Alphaproteobacteria	Parvularculales	Parvularculaceae	AY625139_g	JN628300_s	3.15e-06
E	OTU_183	1	Bacteria	Proteobacteria	Alphaproteobacteria	Rhodospirillales	Rhodospirillaceae	AJ581585_g	AJ581585_s	4.5e-07
E	OTU_186	101	Bacteria	Proteobacteria	Alphaproteobacteria	Rhizobiales	Methylobacteriaceae	Methylobacterium	Methylobacterium sp.	4.54e-05
E	OTU_19	17	Bacteria	Proteobacteria	Betaproteobacteria	Burkholderiales	Comamonadaceae	Rhizobacter	NA	7.64e-06
E	OTU_190	60	Bacteria	Bacteroidetes	Bacteroidia	Bacteroidales	Rikenellaceae	Alistipes	Alistipes_onderdonkii	2.7e-05
E	OTU_191	44	Bacteria	Proteobacteria	Alphaproteobacteria	Rhizobiales	Phyllobacteriaceae	Mesorhizobium	AVBN_s	1.98e-05
E	OTU_194	61	Bacteria	Actinobacteria	Actinobacteria_c	Corynebacteriales	Nocardiaceae	Rhodococcus	Rhodococcus sp.	2.74e-05
E	OTU_2	824089	Bacteria	Proteobacteria	Gammaproteobacteria	Pseudomonadales	Pseudomonadaceae	Pseudomonas	Pseudomonas sp.	0.370455
E	OTU_200	1	Bacteria	Proteobacteria	Deltaproteobacteria	Bdellovibrionales	Bacteriovoracaceae	Peredibacter	AB176175_s	4.5e-07
E	OTU_201	129	Bacteria	Firmicutes	Clostridia	Clostridiales	Ruminococcaceae	Subdoligranulum	DQ797332_s	5.8e-05
E	OTU_206	229	Bacteria	Proteobacteria	Betaproteobacteria	Burkholderiales	Sutterellaceae	Parasutterella	Parasutterella_excrementihominis	0.000102943
E	OTU_209	1	Bacteria	Proteobacteria	Gammaproteobacteria	Legionellales	Coxiellaceae	EF492925_g	EF492925_s	4.5e-07
E	OTU_21	10	Bacteria	Proteobacteria	Gammaproteobacteria	Legionellales	Coxiellaceae	HQ827929_g	AF255642_s	4.5e-06
E	OTU_22	8	Bacteria	Proteobacteria	Betaproteobacteria	NA	NA	NA	NA	3.6e-06
E	OTU_226	4671	Bacteria	Proteobacteria	Alphaproteobacteria	Sphingomonadales	Sphingomonadaceae	Sphingopyxis	Sphingopyxis sp.	0.00209977
E	OTU_228	75	Bacteria	Proteobacteria	Alphaproteobacteria	Rhodobacterales	Rhodobacteraceae	Rhodobaca	Rhodobaca_bogoriensis/Rhodobaca_barguzinensis/Roseinatronobacter_monicus	3.37e-05
E	OTU_23	11	Bacteria	Proteobacteria	Gammaproteobacteria	Chromatiales	DQ123671_f	DQ123671_g	DQ123671_s	4.94e-06
E	OTU_230	76	Bacteria	Proteobacteria	Alphaproteobacteria	Rhodobacterales	Rhodobacteraceae	Paracoccus	Paracoccus_laeviglucosivorans/Paracoccus_yeei	3.42e-05
E	OTU_232	1	Bacteria	Proteobacteria	Alphaproteobacteria	Sphingomonadales	Sphingomonadaceae	Sphingobium	NA	4.5e-07
E	OTU_236	3	Bacteria	Planctomycetes	Phycisphaerae	Phycisphaerales	Phycisphaeraceae	AF445645_g	NA	1.35e-06
E	OTU_237	12	Bacteria	Firmicutes	Bacilli	Bacillales	Staphylococcaceae	Staphylococcus	NA	5.39e-06
E	OTU_24	6	Bacteria	Proteobacteria	Gammaproteobacteria	Acidiferrobacterales	Acidiferrobacteraceae	GQ487954_g	GQ487954_s	2.7e-06
E	OTU_241	25	Bacteria	Proteobacteria	Gammaproteobacteria	Pseudomonadales	Moraxellaceae	Acinetobacter	NA	1.12e-05
E	OTU_25	64	Bacteria	Proteobacteria	Betaproteobacteria	Burkholderiales	Comamonadaceae	Acidovorax	Acidovorax_defluvii	2.88e-05
E	OTU_251	20	Bacteria	Proteobacteria	Alphaproteobacteria	Sphingomonadales	Sphingomonadaceae	Sphingobium	NA	8.99e-06
E	OTU_26	5	Bacteria	Proteobacteria	Alphaproteobacteria	Rhizobiales	Hyphomicrobiaceae	Hyphomicrobium	NA	2.25e-06
E	OTU_264	200	Bacteria	Proteobacteria	Gammaproteobacteria	Chromatiales	NA	NA	NA	8.99e-05
E	OTU_266	39	Bacteria	Proteobacteria	Betaproteobacteria	Burkholderiales	Oxalobacteraceae	Undibacterium	Undibacterium_oligocarboniphilum	1.75e-05
E	OTU_275	19	Bacteria	Actinobacteria	Actinobacteria_c	Corynebacteriales	Corynebacteriaceae	Corynebacterium	NA	8.54e-06
E	OTU_28	2	Bacteria	Proteobacteria	Alphaproteobacteria	Rhizobiales	Cohaesibacteraceae	NA	NA	8.99e-07
E	OTU_284	24	Bacteria	Actinobacteria	Actinobacteria_c	Micrococcales	Dermabacteraceae	Brachybacterium	NA	1.08e-05
E	OTU_286	1	Bacteria	Proteobacteria	Gammaproteobacteria	Acidiferrobacterales	Acidiferrobacteraceae	Sulfuricaulis	EF540405_s	4.5e-07
E	OTU_29	3	Bacteria	Nitrospirae	Nitrospira_c	Nitrospirales	Nitrospiraceae	Nitrospira	DQ058676_s	1.35e-06
E	OTU_293	2	Bacteria	Bacteroidetes	Cytophagia	Cytophagales	Cytophagaceae	JTCM_g	FJ660511_s	8.99e-07
E	OTU_294	11	Bacteria	Proteobacteria	Alphaproteobacteria	Rhizobiales	Chelatococcaceae	Salinarimonas	Salinarimonas_rosea	4.94e-06
E	OTU_295	74	Bacteria	Firmicutes	Bacilli	Bacillales	Bacillaceae	NA	NA	3.33e-05
E	OTU_299	8	Bacteria	Acidobacteria	CP015136_c	CP015136_o	CP015136_f	GU187031_g	FJ230900_s	3.6e-06
E	OTU_3	6	Bacteria	Proteobacteria	Alphaproteobacteria	Rhizobiales	Hyphomicrobiaceae	Hyphomicrobium	AY569281_s	2.7e-06
E	OTU_30	4	Bacteria	Proteobacteria	Alphaproteobacteria	Rhodospirillales	Rhodospirillaceae	HQ673885_g	EU266790_s	1.8e-06
E	OTU_305	71	Bacteria	Proteobacteria	Alphaproteobacteria	Rhizobiales	Chelatococcaceae	HQ697793_g	HQ697793_s	3.19e-05
E	OTU_309	211	Bacteria	Proteobacteria	Alphaproteobacteria	Sphingomonadales	Sphingomonadaceae	Blastomonas	Blastomonas_aquatica	9.49e-05
E	OTU_31	4094	Bacteria	Bacteroidetes	Flavobacteria	Flavobacteriales	Flavobacteriaceae	Chryseobacterium	Chryseobacterium_oleae	0.00184038
E	OTU_310	18	Bacteria	Firmicutes	Clostridia	Clostridiales	Ruminococcaceae	Sporobacter	EF402484_s	8.09e-06
E	OTU_312	87	Bacteria	Actinobacteria	Actinobacteria_c	Corynebacteriales	Dietziaceae	Dietzia	Dietzia_cercidiphylli	3.91e-05
E	OTU_32	1280	Bacteria	Proteobacteria	Alphaproteobacteria	Caulobacterales	Caulobacteraceae	Phenylobacterium	Phenylobacterium_haematophilum	0.000575401
E	OTU_328	164	Bacteria	Firmicutes	Bacilli	Bacillales	Bacillaceae	Bacillus_g6	Bacillus_pseudofirmus	7.37e-05
E	OTU_34	535	Bacteria	Proteobacteria	Gammaproteobacteria	Pseudomonadales	Pseudomonadaceae	Pseudomonas	Pseudomonas sp.	0.0002405
E	OTU_348	134	Bacteria	Actinobacteria	Actinobacteria_c	Micrococcales	Microbacteriaceae	NA	NA	6.02e-05
E	OTU_35	7	Bacteria	Proteobacteria	Gammaproteobacteria	Legionellales	Legionellaceae	Legionella	NA	3.15e-06
E	OTU_352	36	Bacteria	Proteobacteria	Alphaproteobacteria	Rhizobiales	Methylobacteriaceae	Methylobacterium	Methylobacterium sp.	1.62e-05
E	OTU_359	31	Bacteria	Actinobacteria	Actinobacteria_c	Propionibacteriales	Nocardioidaceae	Nocardioides	Nocardioides_ginkgobilobae	1.39e-05
E	OTU_36	146	Bacteria	Proteobacteria	Alphaproteobacteria	Sphingomonadales	Sphingomonadaceae	Sphingomonas	Sphingomonas sp.	6.56e-05
E	OTU_360	58	Eukarya	Streptophyta	eudicotyledons	core_eudicotyledons	NA	NA	NA	2.61e-05
E	OTU_375	6	Bacteria	Actinobacteria	Actinobacteria_c	Frankiales	Geodermatophilaceae	Blastococcus	Blastococcus_aggregatus	2.7e-06
E	OTU_379	59	Bacteria	Firmicutes	Bacilli	Bacillales	Bacillaceae	Bacillus	Bacillus_altitudinis	2.65e-05
E	OTU_389	58	Bacteria	Firmicutes	Limnochordia	Limnochordales	Limnochordaceae	DQ346478_g	FN667161_s	2.61e-05
E	OTU_39	41	Bacteria	Proteobacteria	Alphaproteobacteria	Rhodospirillales	Rhodospirillaceae	Dongia	NA	1.84e-05
E	OTU_397	9	Bacteria	Bacteroidetes	Bacteroidia	Bacteroidales	Porphyromonadaceae	Barnesiella	Barnesiella_intestinihominis	4.05e-06
E	OTU_4	1328	Bacteria	Proteobacteria	Alphaproteobacteria	Sphingomonadales	Sphingomonadaceae	Sphingobium	Sphingobium_xenophagum/JEMV_s	0.000596979
E	OTU_400	3	Bacteria	Proteobacteria	Alphaproteobacteria	Parvularculales	Parvularculaceae	AY625139_g	AY625139_s	1.35e-06
E	OTU_41	985	Bacteria	Proteobacteria	Alphaproteobacteria	Sphingomonadales	Sphingomonadaceae	Sphingomonas	NA	0.000442789
E	OTU_410	2	Bacteria	Proteobacteria	Alphaproteobacteria	Sneathiellales	FJ889304_f	FJ889304_g	AJ581590_s	8.99e-07
E	OTU_411	13	Bacteria	Firmicutes	Clostridia	Clostridiales	Ruminococcaceae	Oscillibacter	HQ400012_s	5.84e-06
E	OTU_412	60	Bacteria	Proteobacteria	Alphaproteobacteria	Sphingomonadales	Sphingomonadaceae	Sphingopyxis	Sphingopyxis sp.	2.7e-05
E	OTU_416	4	Bacteria	Firmicutes	Clostridia	Clostridiales	Lachnospiraceae	Agathobacter	Agathobacter_rectalis	1.8e-06
E	OTU_42	1002	Bacteria	Proteobacteria	Gammaproteobacteria	Chromatiales	EF157132_f	DQ378269_g	DQ378269_s	0.000450431
E	OTU_421	117	Bacteria	Planctomycetes	Planctomycetia	Planctomycetales	Planctomycetaceae	AJ292683_g	NA	5.26e-05
E	OTU_43	3	Bacteria	Proteobacteria	Gammaproteobacteria	Chromatiales	DQ123671_f	DQ123671_g	EU328080_s	1.35e-06
E	OTU_432	34	Bacteria	Proteobacteria	Alphaproteobacteria	Rhodospirillales	Acetobacteraceae	NA	NA	1.53e-05
E	OTU_434	2	Bacteria	Proteobacteria	Gammaproteobacteria	Legionellales	Coxiellaceae	AM991172_g	AM991172_s	8.99e-07
E	OTU_45	1	Bacteria	Proteobacteria	Alphaproteobacteria	Sneathiellales	FJ889304_f	FJ889304_g	HM069098_s	4.5e-07
E	OTU_456	33	Bacteria	Actinobacteria	Actinobacteria_c	Corynebacteriales	Nocardiaceae	Rhodococcus	NA	1.48e-05
E	OTU_47	1	Bacteria	Proteobacteria	Gammaproteobacteria	Acidiferrobacterales	Acidiferrobacteraceae	NA	NA	4.5e-07
E	OTU_473	28	Bacteria	Proteobacteria	Betaproteobacteria	Burkholderiales	Oxalobacteraceae	Herminiimonas	NA	1.26e-05
E	OTU_48	249	Bacteria	Proteobacteria	Betaproteobacteria	Burkholderiales	Oxalobacteraceae	Noviherbaspirillum	Noviherbaspirillum_suwonense	0.000111934
E	OTU_487	1	Bacteria	Bacteroidetes	Sphingobacteriia	CP012155_o	CP012155_f	FJ529921_g	FJ529921_s	4.5e-07
E	OTU_49	1	Bacteria	Cyanobacteria	JQ650114_c	JQ650114_o	JQ650114_f	JQ650114_g	GQ389121_s	4.5e-07
E	OTU_5	103	Bacteria	Proteobacteria	Alphaproteobacteria	Sphingomonadales	Sphingomonadaceae	Novosphingobium	NA	4.63e-05
E	OTU_50	2	Bacteria	Proteobacteria	Betaproteobacteria	Sterolibacterium_o	Sterolibacterium_f	CP010554_g	GQ500877_s	8.99e-07
E	OTU_505	1	Bacteria	Acidobacteria	Blastocatellia	Blastocatellales	EU335275_f	FJ479597_g	HM445431_s	4.5e-07
E	OTU_507	22	Bacteria	Proteobacteria	Gammaproteobacteria	Xanthomonadales	Xanthomonadaceae	Pseudoxanthomonas	Pseudoxanthomonas_yeongjuensis	9.89e-06
E	OTU_51	2	Bacteria	Proteobacteria	Deltaproteobacteria	Bdellovibrionales	Bacteriovoracaceae	Peredibacter	NA	8.99e-07
E	OTU_511	35	Bacteria	Firmicutes	Bacilli	Bacillales	Bacillaceae	Bacillus	Bacillus sp.	1.57e-05
E	OTU_52	5	Bacteria	Proteobacteria	Gammaproteobacteria	Legionellales	Coxiellaceae	HQ827929_g	AF255642_s	2.25e-06
E	OTU_524	31	Bacteria	Firmicutes	Bacilli	Bacillales	Bacillaceae	Bacillus	Bacillus_niacini	1.39e-05
E	OTU_525	1	Bacteria	Chlamydiae	Chlamydiae_c	Chlamydiales	Parachlamydiaceae	Neochlamydia	Neochlamydia_hartmannellae	4.5e-07
E	OTU_532	7	Bacteria	Actinobacteria	Actinobacteria_c	Corynebacteriales	Corynebacteriaceae	Corynebacterium	Corynebacterium_tuberculostearicum	3.15e-06
E	OTU_534	19	Bacteria	Chlamydiae	Chlamydiae_c	Chlamydiales	Parachlamydiaceae	NA	NA	8.54e-06
E	OTU_54	5	Bacteria	Proteobacteria	Alphaproteobacteria	Rhizobiales	Parvibaculum_f	Parvibaculum	FJ375498_s	2.25e-06
E	OTU_551	59	Bacteria	Actinobacteria	Actinobacteria_c	Micrococcales	Brevibacteriaceae	Brevibacterium	Brevibacterium sp.	2.65e-05
E	OTU_56	178	Bacteria	Proteobacteria	Alphaproteobacteria	Rhizobiales	Rhizobiaceae	Rhizobium	Rhizobium_nepotum/Rhizobium_radiobacter/CP002249_s	8e-05
E	OTU_570	35	Bacteria	Firmicutes	Bacilli	Bacillales	Exiguobacteriaceae	Exiguobacterium	Exiguobacterium_aurantiacum/Exiguobacterium_mexicanum	1.57e-05
E	OTU_577	1213	Bacteria	Proteobacteria	Betaproteobacteria	Burkholderiales	Oxalobacteraceae	Massilia	NA	0.000545283
E	OTU_578	1	Bacteria	Actinobacteria	Nitriliruptoria	Nitriliruptorales	Nitriliruptoraceae	Nitriliruptor	DQ432396_s	4.5e-07
E	OTU_598	6	Bacteria	Proteobacteria	Betaproteobacteria	Burkholderiales	Oxalobacteraceae	Massilia	NA	2.7e-06
E	OTU_6	271	Bacteria	Proteobacteria	Gammaproteobacteria	Pseudomonadales	Pseudomonadaceae	Pseudomonas	Pseudomonas_peli	0.000121823
E	OTU_60	2	Bacteria	Proteobacteria	Betaproteobacteria	Burkholderiales	Comamonadaceae	Aquabacterium	NA	8.99e-07
E	OTU_605	21	Bacteria	Proteobacteria	Alphaproteobacteria	Sphingomonadales	Sphingomonadaceae	Sphingopyxis	Sphingopyxis_witflariensis	9.44e-06
E	OTU_61	173	Bacteria	Proteobacteria	Gammaproteobacteria	Xanthomonadales	Xanthomonadaceae	Stenotrophomonas	NA	7.78e-05
E	OTU_612	1	Bacteria	TM6	TM6_c	Babela_o	EF219035_f	EF219035_g	AB630938_s	4.5e-07
E	OTU_615	12	Bacteria	Bacteroidetes	Bacteroidia	Bacteroidales	Bacteroidaceae	Bacteroides	Bacteroides_vulgatus	5.39e-06
E	OTU_618	15	Bacteria	Proteobacteria	Alphaproteobacteria	Caulobacterales	Caulobacteraceae	Brevundimonas	Brevundimonas_mediterranea	6.74e-06
E	OTU_62	2	Bacteria	Proteobacteria	Betaproteobacteria	DQ395705_o	DQ395705_f	DQ395705_g	FJ715983_s	8.99e-07
E	OTU_625	3	Bacteria	Proteobacteria	Alphaproteobacteria	Sphingomonadales	Sphingomonadaceae	Sphingorhabdus	Sphingopyxis_contaminans	1.35e-06
E	OTU_63	1	Bacteria	Proteobacteria	Gammaproteobacteria	Chromatiales	DQ123671_f	DQ123671_g	EU328080_s	4.5e-07
E	OTU_639	20	Bacteria	Actinobacteria	Actinobacteria_c	Propionibacteriales	Propionibacteriaceae	Propionibacterium	Propionibacterium_acnes	8.99e-06
E	OTU_64	66	Bacteria	Proteobacteria	Alphaproteobacteria	Rhizobiales	Bradyrhizobiaceae	Bradyrhizobium	Bradyrhizobium sp.	2.97e-05
E	OTU_655	433	Bacteria	Proteobacteria	Gammaproteobacteria	Pseudomonadales	Pseudomonadaceae	Pseudomonas	Pseudomonas sp.	0.000194648
E	OTU_66	1	Bacteria	Proteobacteria	Betaproteobacteria	Burkholderiales	Comamonadaceae	Polaromonas	CP000316_s/AKIV_s	4.5e-07
E	OTU_688	4	Bacteria	Proteobacteria	Alphaproteobacteria	Rhizobiales	Methylobacteriaceae	Psychroglaciecola	EU861971_s	1.8e-06
E	OTU_69	283	Bacteria	Bacteroidetes	Sphingobacteriia	Sphingobacteriales	Sphingobacteriaceae	Pedobacter	Pedobacter_lotistagni	0.000127218
E	OTU_691	766	Bacteria	Proteobacteria	Alphaproteobacteria	Sphingomonadales	Sphingomonadaceae	Sphingomonas	JF459933_s	0.000344342
E	OTU_7	1627	Bacteria	Bacteroidetes	Flavobacteria	Flavobacteriales	Flavobacteriaceae	Flavobacterium	NA	0.000731389
E	OTU_70	5	Bacteria	Planctomycetes	AM056027_c	HQ681992_o	HQ681992_f	HQ681992_g	FJ208828_s	2.25e-06
E	OTU_710	10	Bacteria	Proteobacteria	Betaproteobacteria	Burkholderiales	Comamonadaceae	NA	NA	4.5e-06
E	OTU_723	472	Bacteria	Bacteroidetes	Flavobacteria	Flavobacteriales	Flavobacteriaceae	Flavobacterium	NA	0.000212179
E	OTU_73	1	Bacteria	Proteobacteria	Gammaproteobacteria	Nevskiales	Sinobacteraceae	Nevskia	Nevskia_ramosa	4.5e-07
E	OTU_746	1	Bacteria	Proteobacteria	Alphaproteobacteria	Rhizobiales	Bradyrhizobiaceae	Rhodoplanes	PAC000730_s	4.5e-07
E	OTU_749	3	Bacteria	Bacteroidetes	Bacteroidia	Bacteroidales	Porphyromonadaceae	Parabacteroides	Parabacteroides_merdae	1.35e-06
E	OTU_76	2	Bacteria	Proteobacteria	Gammaproteobacteria	Xanthomonadales	Xanthomonadaceae	Arenimonas	Arenimonas_subflava	8.99e-07
E	OTU_775	1	Bacteria	Bacteroidetes	Bacteroidia	Bacteroidales	Bacteroidaceae	Bacteroides	Bacteroides_caccae	4.5e-07
E	OTU_785	2	Bacteria	Proteobacteria	Betaproteobacteria	Burkholderiales	Oxalobacteraceae	Noviherbaspirillum	NA	8.99e-07
E	OTU_787	4	Bacteria	Proteobacteria	Alphaproteobacteria	Sphingomonadales	Sphingomonadaceae	Novosphingobium	NA	1.8e-06
E	OTU_789	112	Bacteria	Proteobacteria	Gammaproteobacteria	Pseudomonadales	Moraxellaceae	Acinetobacter	NA	5.03e-05
E	OTU_79	1534	Bacteria	Proteobacteria	Betaproteobacteria	Burkholderiales	Oxalobacteraceae	Undibacterium	Undibacterium_parvum	0.000689583
E	OTU_8	99	Bacteria	Proteobacteria	Alphaproteobacteria	Sphingomonadales	Sphingomonadaceae	Sphingomonas	Sphingomonas_histidinilytica	4.45e-05
E	OTU_801	38	Bacteria	Proteobacteria	Gammaproteobacteria	Pseudomonadales	Pseudomonadaceae	Pseudomonas	Pseudomonas sp.	1.71e-05
E	OTU_81	11	Bacteria	Proteobacteria	Alphaproteobacteria	Rhizobiales	Bosea_f	Bosea	Bosea_lathyri	4.94e-06
E	OTU_820	860	Bacteria	Proteobacteria	Betaproteobacteria	Burkholderiales	Comamonadaceae	Variovorax	Variovorax_ginsengisoli	0.000386598
E	OTU_83	2	Bacteria	Proteobacteria	Alphaproteobacteria	Rhizobiales	Hyphomicrobiaceae	Hyphomicrobium	JN090780_s	8.99e-07
E	OTU_843	6	Bacteria	Bacteroidetes	Bacteroidia	Bacteroidales	Porphyromonadaceae	Parabacteroides	Parabacteroides_distasonis	2.7e-06
E	OTU_845	1	Bacteria	Proteobacteria	Alphaproteobacteria	Sphingomonadales	Sphingomonadaceae	NA	NA	4.5e-07
E	OTU_846	2	Bacteria	Bacteroidetes	Bacteroidia	Bacteroidales	Rikenellaceae	Alistipes	Alistipes_inops	8.99e-07
E	OTU_857	10	Bacteria	Cyanobacteria	Vampirovibrio_c	FR888536_o	FR888536_f	FR888536_g	HF996393_s	4.5e-06
E	OTU_86	38	Bacteria	Proteobacteria	Gammaproteobacteria	Xanthomonadales	Xanthomonadaceae	Pseudoxanthomonas	Pseudoxanthomonas_mexicana	1.71e-05
E	OTU_87	16	Bacteria	Bacteroidetes	Bacteroidia	Bacteroidales	Bacteroidaceae	Bacteroides	Bacteroides_uniformis	7.19e-06
E	OTU_877	6	Bacteria	Firmicutes	Clostridia	Clostridiales	Ruminococcaceae	Oscillibacter	GQ896991_s	2.7e-06
E	OTU_88	1	Bacteria	Proteobacteria	Alphaproteobacteria	Rhizobiales	Bradyrhizobiaceae	NA	NA	4.5e-07
E	OTU_89	1	Bacteria	Proteobacteria	Gammaproteobacteria	Legionellales	Legionellaceae	Legionella	JQ923995_s	4.5e-07
E	OTU_890	9	Unclassified	NA	NA	NA	NA	NA	NA	4.05e-06
E	OTU_925	2	Bacteria	Firmicutes	Clostridia	Clostridiales	Christensenellaceae	HQ716403_g	NA	8.99e-07
E	OTU_935	1	Bacteria	Proteobacteria	Gammaproteobacteria	Chromatiales	DQ123671_f	DQ123671_g	DQ123671_s	4.5e-07
E	OTU_94	569	Bacteria	Actinobacteria	Actinobacteria_c	Corynebacteriales	Mycobacteriaceae	Mycobacterium	NA	0.000255784
E	OTU_949	104	Bacteria	Proteobacteria	Betaproteobacteria	Burkholderiales	Oxalobacteraceae	Herminiimonas	Herminiimonas_contaminans	4.68e-05
E	OTU_956	62	Bacteria	Proteobacteria	Alphaproteobacteria	Rhizobiales	Bradyrhizobiaceae	Rhodopseudomonas	NA	2.79e-05
E	OTU_959	22	Bacteria	Proteobacteria	Alphaproteobacteria	Caulobacterales	Caulobacteraceae	Caulobacter	Caulobacter sp.	9.89e-06
E	OTU_96	1	Bacteria	Proteobacteria	Betaproteobacteria	Gallionellales	Gallionellaceae	Sideroxydans	DQ228367_s	4.5e-07
E	OTU_964	127	Bacteria	Proteobacteria	Alphaproteobacteria	Sphingomonadales	Sphingomonadaceae	Sphingobium	Sphingobium_limneticum	5.71e-05
E	OTU_97	2	Bacteria	Proteobacteria	Alphaproteobacteria	Rhodospirillales	Rhodospirillaceae	AF407727_g	NA	8.99e-07
E	OTU_972	12	Bacteria	Actinobacteria	Actinobacteria_c	Micrococcales	Micrococcaceae	Rothia	Rothia_mucilaginosa	5.39e-06
E	OTU_98	1	Bacteria	Proteobacteria	Deltaproteobacteria	Bdellovibrionales	Bacteriovoracaceae	NA	NA	4.5e-07
E	OTU_984	6	Bacteria	Actinobacteria	Actinobacteria_c	Propionibacteriales	Nocardioidaceae	Aeromicrobium	NA	2.7e-06
F	OTU_1	1911661	Bacteria	Proteobacteria	Gammaproteobacteria	Pseudomonadales	Pseudomonadaceae	Pseudomonas	Pseudomonas sp.	0.760484
F	OTU_1014	16	Bacteria	Bacteroidetes	Bacteroidia	Bacteroidales	Bacteroidaceae	Bacteroides	NA	6.37e-06
F	OTU_107	958	Bacteria	Proteobacteria	Betaproteobacteria	Burkholderiales	Sutterellaceae	Parasutterella	AJ315485_s	0.000381105
F	OTU_1074	26	Bacteria	Proteobacteria	Betaproteobacteria	Burkholderiales	Oxalobacteraceae	Massilia	NA	1.03e-05
F	OTU_1129	50	Bacteria	Proteobacteria	Alphaproteobacteria	Rhizobiales	Methylobacteriaceae	Methylobacterium	Methylobacterium_jeotgali	1.99e-05
F	OTU_1132	14	Bacteria	Bacteroidetes	Bacteroidia	Bacteroidales	Rikenellaceae	Alistipes	Alistipes_finegoldii	5.57e-06
F	OTU_1137	1	Bacteria	Bacteroidetes	Bacteroidia	Bacteroidales	Bacteroidaceae	Bacteroides	Bacteroides_fragilis	3.98e-07
F	OTU_114	95	Bacteria	Proteobacteria	Alphaproteobacteria	Caulobacterales	Caulobacteraceae	Brevundimonas	Brevundimonas_nasdae/Brevundimonas_albigilva/Brevundimonas_vesicularis	3.78e-05
F	OTU_1144	5	Bacteria	Firmicutes	Clostridia	Clostridiales	Christensenellaceae	HM124260_g	EU778320_s	1.99e-06
F	OTU_1158	7	Bacteria	Proteobacteria	Alphaproteobacteria	Caulobacterales	Caulobacteraceae	Brevundimonas	Brevundimonas_halotolerans	2.78e-06
F	OTU_1167	5	Bacteria	Firmicutes	Clostridia	Clostridiales	Lachnospiraceae	Lachnospira	Lachnospira_pectinoschiza	1.99e-06
F	OTU_1183	13	Bacteria	Firmicutes	Clostridia	Clostridiales	Peptostreptococcaceae	Romboutsia	HQ768009_s	5.17e-06
F	OTU_1189	6	Bacteria	Bacteroidetes	Bacteroidia	Bacteroidales	Odoribacteraceae	Odoribacter	Odoribacter_splanchnicus	2.39e-06
F	OTU_120	612	Bacteria	Proteobacteria	Betaproteobacteria	Burkholderiales	Sutterellaceae	Sutterella	AY684426_s	0.000243462
F	OTU_124	153	Bacteria	Proteobacteria	Betaproteobacteria	Burkholderiales	Comamonadaceae	Delftia	Delftia_acidovorans	6.09e-05
F	OTU_125	9	Bacteria	Proteobacteria	Betaproteobacteria	Burkholderiales	Oxalobacteraceae	Massilia	Massilia_aurea	3.58e-06
F	OTU_13	11	Bacteria	Proteobacteria	Gammaproteobacteria	Pseudomonadales	Moraxellaceae	Acinetobacter	Acinetobacter_harbinensis	4.38e-06
F	OTU_137	123	Bacteria	Proteobacteria	Alphaproteobacteria	Rhodospirillales	Rhodospirillaceae	Reyranella	Reyranella_massiliensis	4.89e-05
F	OTU_145	3	Bacteria	Proteobacteria	Gammaproteobacteria	Enterobacteriales	Enterobacteriaceae	Escherichia	NA	1.19e-06
F	OTU_16	11	Bacteria	Proteobacteria	Betaproteobacteria	Burkholderiales	Oxalobacteraceae	Massilia	Massilia_yuzhufengensis	4.38e-06
F	OTU_160	15	Bacteria	Firmicutes	Bacilli	Bacillales	Planococcaceae	Lysinibacillus	Lysinibacillus_sphaericus/Lysinibacillus_fusiformis/Lysinibacillus_mangiferihumi	5.97e-06
F	OTU_163	2	Bacteria	Chlamydiae	Chlamydiae_c	Chlamydiales	Waddliaceae	Waddlia	Waddlia_chondrophila	7.96e-07
F	OTU_164	190	Bacteria	Proteobacteria	Betaproteobacteria	Neisseriales	Neisseriaceae	FM873692_g	FM873692_s	7.56e-05
F	OTU_165	447	Bacteria	Actinobacteria	Actinobacteria_c	Corynebacteriales	Nocardiaceae	Rhodococcus	Rhodococcus_qingshengii/Rhodococcus_degradans/Rhodococcus_erythropolis	0.000177823
F	OTU_166	274	Bacteria	Firmicutes	Clostridia	Clostridiales	Ruminococcaceae	Faecalibacterium	Faecalibacterium_prausnitzii	0.000109001
F	OTU_170	246	Bacteria	Proteobacteria	Gammaproteobacteria	Pseudomonadales	Moraxellaceae	Moraxella	Psychrobacter_ciconiae	9.79e-05
F	OTU_189	242	Bacteria	Proteobacteria	Betaproteobacteria	Burkholderiales	Alcaligenaceae	Achromobacter	NA	9.63e-05
F	OTU_190	172	Bacteria	Bacteroidetes	Bacteroidia	Bacteroidales	Rikenellaceae	Alistipes	Alistipes_onderdonkii	6.84e-05
F	OTU_191	75	Bacteria	Proteobacteria	Alphaproteobacteria	Rhizobiales	Phyllobacteriaceae	Mesorhizobium	AVBN_s	2.98e-05
F	OTU_194	117	Bacteria	Actinobacteria	Actinobacteria_c	Corynebacteriales	Nocardiaceae	Rhodococcus	Rhodococcus sp.	4.65e-05
F	OTU_2	111152	Bacteria	Proteobacteria	Gammaproteobacteria	Pseudomonadales	Pseudomonadaceae	Pseudomonas	Pseudomonas sp.	0.0442177
F	OTU_201	9	Bacteria	Firmicutes	Clostridia	Clostridiales	Ruminococcaceae	Subdoligranulum	DQ797332_s	3.58e-06
F	OTU_205	389	Bacteria	Bacteroidetes	Bacteroidia	Bacteroidales	S24-7_f	EF406806_g	FM874542_s	0.000154749
F	OTU_225	148	Bacteria	Proteobacteria	Alphaproteobacteria	Rhodospirillales	Acetobacteraceae	Roseomonas	Roseomonas_cervicalis	5.89e-05
F	OTU_226	833	Bacteria	Proteobacteria	Alphaproteobacteria	Sphingomonadales	Sphingomonadaceae	Sphingopyxis	Sphingopyxis sp.	0.000331378
F	OTU_228	11	Bacteria	Proteobacteria	Alphaproteobacteria	Rhodobacterales	Rhodobacteraceae	Rhodobaca	Rhodobaca_bogoriensis/Rhodobaca_barguzinensis/Roseinatronobacter_monicus	4.38e-06
F	OTU_230	74	Bacteria	Proteobacteria	Alphaproteobacteria	Rhodobacterales	Rhodobacteraceae	Paracoccus	Paracoccus_laeviglucosivorans/Paracoccus_yeei	2.94e-05
F	OTU_237	466	Bacteria	Firmicutes	Bacilli	Bacillales	Staphylococcaceae	Staphylococcus	NA	0.000185381
F	OTU_241	198	Bacteria	Proteobacteria	Gammaproteobacteria	Pseudomonadales	Moraxellaceae	Acinetobacter	NA	7.88e-05
F	OTU_249	123	Bacteria	Proteobacteria	Alphaproteobacteria	Rhizobiales	Bradyrhizobiaceae	Tardiphaga	Tardiphaga_robiniae	4.89e-05
F	OTU_25	38	Bacteria	Proteobacteria	Betaproteobacteria	Burkholderiales	Comamonadaceae	Acidovorax	Acidovorax_defluvii	1.51e-05
F	OTU_255	122	Bacteria	Firmicutes	Clostridia	Clostridiales	Ruminococcaceae	Eubacterium_g23	EF404137_s	4.85e-05
F	OTU_266	33	Bacteria	Proteobacteria	Betaproteobacteria	Burkholderiales	Oxalobacteraceae	Undibacterium	Undibacterium_oligocarboniphilum	1.31e-05
F	OTU_275	147	Bacteria	Actinobacteria	Actinobacteria_c	Corynebacteriales	Corynebacteriaceae	Corynebacterium	NA	5.85e-05
F	OTU_28	312	Bacteria	Proteobacteria	Alphaproteobacteria	Rhizobiales	Cohaesibacteraceae	NA	NA	0.000124118
F	OTU_284	174	Bacteria	Actinobacteria	Actinobacteria_c	Micrococcales	Dermabacteraceae	Brachybacterium	NA	6.92e-05
F	OTU_295	82	Bacteria	Firmicutes	Bacilli	Bacillales	Bacillaceae	NA	NA	3.26e-05
F	OTU_309	32	Bacteria	Proteobacteria	Alphaproteobacteria	Sphingomonadales	Sphingomonadaceae	Blastomonas	Blastomonas_aquatica	1.27e-05
F	OTU_310	10	Bacteria	Firmicutes	Clostridia	Clostridiales	Ruminococcaceae	Sporobacter	EF402484_s	3.98e-06
F	OTU_32	38	Bacteria	Proteobacteria	Alphaproteobacteria	Caulobacterales	Caulobacteraceae	Phenylobacterium	Phenylobacterium_haematophilum	1.51e-05
F	OTU_320	121	Bacteria	Actinobacteria	Actinobacteria_c	Micrococcales	Brevibacteriaceae	Brevibacterium	Brevibacterium_pityocampae	4.81e-05
F	OTU_328	27	Bacteria	Firmicutes	Bacilli	Bacillales	Bacillaceae	Bacillus_g6	Bacillus_pseudofirmus	1.07e-05
F	OTU_339	38	Bacteria	Proteobacteria	Betaproteobacteria	Burkholderiales	Ralstonia_f	Ralstonia	Ralstonia_insidiosa	1.51e-05
F	OTU_34	134920	Bacteria	Proteobacteria	Gammaproteobacteria	Pseudomonadales	Pseudomonadaceae	Pseudomonas	Pseudomonas sp.	0.053673
F	OTU_36	539	Bacteria	Proteobacteria	Alphaproteobacteria	Sphingomonadales	Sphingomonadaceae	Sphingomonas	Sphingomonas sp.	0.000214421
F	OTU_397	68	Bacteria	Bacteroidetes	Bacteroidia	Bacteroidales	Porphyromonadaceae	Barnesiella	Barnesiella_intestinihominis	2.71e-05
F	OTU_4	353	Bacteria	Proteobacteria	Alphaproteobacteria	Sphingomonadales	Sphingomonadaceae	Sphingobium	Sphingobium_xenophagum/JEMV_s	0.000140428
F	OTU_40	2710	Bacteria	Bacteroidetes	Flavobacteria	Flavobacteriales	Flavobacteriaceae	Flavobacterium	NA	0.00107807
F	OTU_41	168	Bacteria	Proteobacteria	Alphaproteobacteria	Sphingomonadales	Sphingomonadaceae	Sphingomonas	NA	6.68e-05
F	OTU_411	22	Bacteria	Firmicutes	Clostridia	Clostridiales	Ruminococcaceae	Oscillibacter	HQ400012_s	8.75e-06
F	OTU_412	7	Bacteria	Proteobacteria	Alphaproteobacteria	Sphingomonadales	Sphingomonadaceae	Sphingopyxis	Sphingopyxis sp.	2.78e-06
F	OTU_416	43	Bacteria	Firmicutes	Clostridia	Clostridiales	Lachnospiraceae	Agathobacter	Agathobacter_rectalis	1.71e-05
F	OTU_48	4	Bacteria	Proteobacteria	Betaproteobacteria	Burkholderiales	Oxalobacteraceae	Noviherbaspirillum	Noviherbaspirillum_suwonense	1.59e-06
F	OTU_483	54	Bacteria	Firmicutes	Bacilli	Bacillales	Staphylococcaceae	Jeotgalicoccus	Jeotgalicoccus_nanhaiensis/Jeotgalicoccus_halophilus/Jeotgalicoccus_aerolatus	2.15e-05
F	OTU_5	1	Bacteria	Proteobacteria	Alphaproteobacteria	Sphingomonadales	Sphingomonadaceae	Novosphingobium	NA	3.98e-07
F	OTU_502	21	Bacteria	Firmicutes	Bacilli	Lactobacillales	Streptococcaceae	Streptococcus	Streptococcus sp.	8.35e-06
F	OTU_520	43	Bacteria	Firmicutes	Clostridia	Clostridiales	Lachnospiraceae	Blautia	Blautia_wexlerae	1.71e-05
F	OTU_532	39	Bacteria	Actinobacteria	Actinobacteria_c	Corynebacteriales	Corynebacteriaceae	Corynebacterium	Corynebacterium_tuberculostearicum	1.55e-05
F	OTU_56	1114	Bacteria	Proteobacteria	Alphaproteobacteria	Rhizobiales	Rhizobiaceae	Rhizobium	Rhizobium_nepotum/Rhizobium_radiobacter/CP002249_s	0.000443164
F	OTU_570	2	Bacteria	Firmicutes	Bacilli	Bacillales	Exiguobacteriaceae	Exiguobacterium	Exiguobacterium_aurantiacum/Exiguobacterium_mexicanum	7.96e-07
F	OTU_573	71	Bacteria	Gemmatimonadetes	Longimicrobia	Longimicrobiales	GQ263002_f	GQ263002_g	NA	2.82e-05
F	OTU_580	6	Bacteria	Firmicutes	Tissierellia	Tissierellales	Peptoniphilaceae	Anaerococcus	HM587319_s	2.39e-06
F	OTU_598	673	Bacteria	Proteobacteria	Betaproteobacteria	Burkholderiales	Oxalobacteraceae	Massilia	NA	0.000267728
F	OTU_6	295	Bacteria	Proteobacteria	Gammaproteobacteria	Pseudomonadales	Pseudomonadaceae	Pseudomonas	Pseudomonas_peli	0.000117355
F	OTU_60	566	Bacteria	Proteobacteria	Betaproteobacteria	Burkholderiales	Comamonadaceae	Aquabacterium	NA	0.000225162
F	OTU_605	183	Bacteria	Proteobacteria	Alphaproteobacteria	Sphingomonadales	Sphingomonadaceae	Sphingopyxis	Sphingopyxis_witflariensis	7.28e-05
F	OTU_61	108	Bacteria	Proteobacteria	Gammaproteobacteria	Xanthomonadales	Xanthomonadaceae	Stenotrophomonas	NA	4.3e-05
F	OTU_615	30	Bacteria	Bacteroidetes	Bacteroidia	Bacteroidales	Bacteroidaceae	Bacteroides	Bacteroides_vulgatus	1.19e-05
F	OTU_618	38	Bacteria	Proteobacteria	Alphaproteobacteria	Caulobacterales	Caulobacteraceae	Brevundimonas	Brevundimonas_mediterranea	1.51e-05
F	OTU_625	9	Bacteria	Proteobacteria	Alphaproteobacteria	Sphingomonadales	Sphingomonadaceae	Sphingorhabdus	Sphingopyxis_contaminans	3.58e-06
F	OTU_639	2	Bacteria	Actinobacteria	Actinobacteria_c	Propionibacteriales	Propionibacteriaceae	Propionibacterium	Propionibacterium_acnes	7.96e-07
F	OTU_64	5	Bacteria	Proteobacteria	Alphaproteobacteria	Rhizobiales	Bradyrhizobiaceae	Bradyrhizobium	Bradyrhizobium sp.	1.99e-06
F	OTU_655	337852	Bacteria	Proteobacteria	Gammaproteobacteria	Pseudomonadales	Pseudomonadaceae	Pseudomonas	Pseudomonas sp.	0.134402
F	OTU_691	1725	Bacteria	Proteobacteria	Alphaproteobacteria	Sphingomonadales	Sphingomonadaceae	Sphingomonas	JF459933_s	0.000686228
F	OTU_7	1	Bacteria	Bacteroidetes	Flavobacteria	Flavobacteriales	Flavobacteriaceae	Flavobacterium	NA	3.98e-07
F	OTU_710	2	Bacteria	Proteobacteria	Betaproteobacteria	Burkholderiales	Comamonadaceae	NA	NA	7.96e-07
F	OTU_723	332	Bacteria	Bacteroidetes	Flavobacteria	Flavobacteriales	Flavobacteriaceae	Flavobacterium	NA	0.000132074
F	OTU_749	17	Bacteria	Bacteroidetes	Bacteroidia	Bacteroidales	Porphyromonadaceae	Parabacteroides	Parabacteroides_merdae	6.76e-06
F	OTU_775	9	Bacteria	Bacteroidetes	Bacteroidia	Bacteroidales	Bacteroidaceae	Bacteroides	Bacteroides_caccae	3.58e-06
F	OTU_8	15	Bacteria	Proteobacteria	Alphaproteobacteria	Sphingomonadales	Sphingomonadaceae	Sphingomonas	Sphingomonas_histidinilytica	5.97e-06
F	OTU_801	1	Bacteria	Proteobacteria	Gammaproteobacteria	Pseudomonadales	Pseudomonadaceae	Pseudomonas	Pseudomonas sp.	3.98e-07
F	OTU_843	8	Bacteria	Bacteroidetes	Bacteroidia	Bacteroidales	Porphyromonadaceae	Parabacteroides	Parabacteroides_distasonis	3.18e-06
F	OTU_846	27	Bacteria	Bacteroidetes	Bacteroidia	Bacteroidales	Rikenellaceae	Alistipes	Alistipes_inops	1.07e-05
F	OTU_857	2	Bacteria	Cyanobacteria	Vampirovibrio_c	FR888536_o	FR888536_f	FR888536_g	HF996393_s	7.96e-07
F	OTU_86	579	Bacteria	Proteobacteria	Gammaproteobacteria	Xanthomonadales	Xanthomonadaceae	Pseudoxanthomonas	Pseudoxanthomonas_mexicana	0.000230334
F	OTU_87	916	Bacteria	Bacteroidetes	Bacteroidia	Bacteroidales	Bacteroidaceae	Bacteroides	Bacteroides_uniformis	0.000364397
F	OTU_877	23	Bacteria	Firmicutes	Clostridia	Clostridiales	Ruminococcaceae	Oscillibacter	GQ896991_s	9.15e-06
F	OTU_925	3	Bacteria	Firmicutes	Clostridia	Clostridiales	Christensenellaceae	HQ716403_g	NA	1.19e-06
G	OTU_1	394204	Bacteria	Proteobacteria	Gammaproteobacteria	Pseudomonadales	Pseudomonadaceae	Pseudomonas	Pseudomonas sp.	0.318481
G	OTU_1014	5	Bacteria	Bacteroidetes	Bacteroidia	Bacteroidales	Bacteroidaceae	Bacteroides	NA	4.04e-06
G	OTU_1060	31	Bacteria	Proteobacteria	Alphaproteobacteria	Sphingomonadales	Erythrobacteraceae	Altererythrobacter	Altererythrobacter_troitsensis	2.5e-05
G	OTU_1067	2	Bacteria	Proteobacteria	Gammaproteobacteria	Legionellales	Legionellaceae	Legionella	NA	1.62e-06
G	OTU_1068	46	Bacteria	Firmicutes	NA	NA	NA	NA	NA	3.72e-05
G	OTU_1074	59	Bacteria	Proteobacteria	Betaproteobacteria	Burkholderiales	Oxalobacteraceae	Massilia	NA	4.77e-05
G	OTU_1077	32	Bacteria	Planctomycetes	Planctomycetia	Planctomycetales	Planctomycetaceae	AY234711_g	AB630606_s	2.59e-05
G	OTU_1132	4	Bacteria	Bacteroidetes	Bacteroidia	Bacteroidales	Rikenellaceae	Alistipes	Alistipes_finegoldii	3.23e-06
G	OTU_114	14	Bacteria	Proteobacteria	Alphaproteobacteria	Caulobacterales	Caulobacteraceae	Brevundimonas	Brevundimonas_nasdae/Brevundimonas_albigilva/Brevundimonas_vesicularis	1.13e-05
G	OTU_1144	6	Bacteria	Firmicutes	Clostridia	Clostridiales	Christensenellaceae	HM124260_g	EU778320_s	4.85e-06
G	OTU_1159	2	Bacteria	Cyanobacteria	Vampirovibrio_c	FR888536_o	FR888536_f	FR888536_g	FR888536_s	1.62e-06
G	OTU_116	504	Bacteria	Bacteroidetes	Cytophagia	Cytophagales	Cytophagaceae	Cytophaga	Cytophaga_aurantiaca	0.000407186
G	OTU_1161	16	Bacteria	Firmicutes	Tissierellia	Tissierellales	Peptoniphilaceae	Anaerococcus	Anaerococcus_octavius	1.29e-05
G	OTU_1167	6	Bacteria	Firmicutes	Clostridia	Clostridiales	Lachnospiraceae	Lachnospira	Lachnospira_pectinoschiza	4.85e-06
G	OTU_1188	1	Bacteria	Proteobacteria	Gammaproteobacteria	Pseudomonadales	Pseudomonadaceae	Pseudomonas	Pseudomonas_extremaustralis	8.08e-07
G	OTU_1189	2	Bacteria	Bacteroidetes	Bacteroidia	Bacteroidales	Odoribacteraceae	Odoribacter	Odoribacter_splanchnicus	1.62e-06
G	OTU_120	30	Bacteria	Proteobacteria	Betaproteobacteria	Burkholderiales	Sutterellaceae	Sutterella	AY684426_s	2.42e-05
G	OTU_124	56	Bacteria	Proteobacteria	Betaproteobacteria	Burkholderiales	Comamonadaceae	Delftia	Delftia_acidovorans	4.52e-05
G	OTU_125	4930	Bacteria	Proteobacteria	Betaproteobacteria	Burkholderiales	Oxalobacteraceae	Massilia	Massilia_aurea	0.00398299
G	OTU_13	1	Bacteria	Proteobacteria	Gammaproteobacteria	Pseudomonadales	Moraxellaceae	Acinetobacter	Acinetobacter_harbinensis	8.08e-07
G	OTU_137	3	Bacteria	Proteobacteria	Alphaproteobacteria	Rhodospirillales	Rhodospirillaceae	Reyranella	Reyranella_massiliensis	2.42e-06
G	OTU_151	369	Bacteria	Bacteroidetes	Sphingobacteriia	Sphingobacteriales	Sphingobacteriaceae	Pedobacter	Pedobacter_panaciterrae	0.000298118
G	OTU_16	57446	Bacteria	Proteobacteria	Betaproteobacteria	Burkholderiales	Oxalobacteraceae	Massilia	Massilia_yuzhufengensis	0.0464111
G	OTU_160	67	Bacteria	Firmicutes	Bacilli	Bacillales	Planococcaceae	Lysinibacillus	Lysinibacillus_sphaericus/Lysinibacillus_fusiformis/Lysinibacillus_mangiferihumi	5.41e-05
G	OTU_166	49	Bacteria	Firmicutes	Clostridia	Clostridiales	Ruminococcaceae	Faecalibacterium	Faecalibacterium_prausnitzii	3.96e-05
G	OTU_169	297	Bacteria	Saccharibacteria_TM7	Saccharimonas_c	Saccharimonas_o	JF421159_f	JF421159_g	NA	0.000239949
G	OTU_176	192	Bacteria	Bacteroidetes	Sphingobacteriia	Sphingobacteriales	Sphingobacteriaceae	Pedobacter_g3	Pedobacter_tournemirensis	0.000155118
G	OTU_186	119	Bacteria	Proteobacteria	Alphaproteobacteria	Rhizobiales	Methylobacteriaceae	Methylobacterium	Methylobacterium sp.	9.61e-05
G	OTU_190	62	Bacteria	Bacteroidetes	Bacteroidia	Bacteroidales	Rikenellaceae	Alistipes	Alistipes_onderdonkii	5.01e-05
G	OTU_191	6	Bacteria	Proteobacteria	Alphaproteobacteria	Rhizobiales	Phyllobacteriaceae	Mesorhizobium	AVBN_s	4.85e-06
G	OTU_2	246522	Bacteria	Proteobacteria	Gammaproteobacteria	Pseudomonadales	Pseudomonadaceae	Pseudomonas	Pseudomonas sp.	0.199167
G	OTU_201	13	Bacteria	Firmicutes	Clostridia	Clostridiales	Ruminococcaceae	Subdoligranulum	DQ797332_s	1.05e-05
G	OTU_220	10	Bacteria	Bacteroidetes	Sphingobacteriia	Sphingobacteriales	Chitinophagaceae	Terrimonas	HQ645184_s	8.08e-06
G	OTU_222	148	Bacteria	Saccharibacteria_TM7	Saccharimonas_c	Saccharimonas_o	Saccharimonas_f	Saccharimonas	JN409160_s	0.00011957
G	OTU_226	19459	Bacteria	Proteobacteria	Alphaproteobacteria	Sphingomonadales	Sphingomonadaceae	Sphingopyxis	Sphingopyxis sp.	0.0157211
G	OTU_229	222	Bacteria	Bacteroidetes	Bacteroidia	Bacteroidales	Prevotellaceae	Prevotella	JN245855_s	0.000179356
G	OTU_230	13	Bacteria	Proteobacteria	Alphaproteobacteria	Rhodobacterales	Rhodobacteraceae	Paracoccus	Paracoccus_laeviglucosivorans/Paracoccus_yeei	1.05e-05
G	OTU_233	156	Bacteria	Bacteroidetes	Cytophagia	Cytophagales	Cytophagaceae	Sporocytophaga	NA	0.000126034
G	OTU_237	76	Bacteria	Firmicutes	Bacilli	Bacillales	Staphylococcaceae	Staphylococcus	NA	6.14e-05
G	OTU_241	8	Bacteria	Proteobacteria	Gammaproteobacteria	Pseudomonadales	Moraxellaceae	Acinetobacter	NA	6.46e-06
G	OTU_249	19	Bacteria	Proteobacteria	Alphaproteobacteria	Rhizobiales	Bradyrhizobiaceae	Tardiphaga	Tardiphaga_robiniae	1.54e-05
G	OTU_251	3	Bacteria	Proteobacteria	Alphaproteobacteria	Sphingomonadales	Sphingomonadaceae	Sphingobium	NA	2.42e-06
G	OTU_253	102	Eukarya	Phaeophyceae	Ectocarpales_c	Ectocarpales	EF574962_f	HQ218597_g	HQ218597_s	8.24e-05
G	OTU_254	7	Bacteria	Proteobacteria	Deltaproteobacteria	FM253572_o	FM253606_f	FM253606_g	FM253606_s	5.66e-06
G	OTU_266	2	Bacteria	Proteobacteria	Betaproteobacteria	Burkholderiales	Oxalobacteraceae	Undibacterium	Undibacterium_oligocarboniphilum	1.62e-06
G	OTU_272	12	Bacteria	Bacteroidetes	Cytophagia	Cytophagales	Cytophagaceae	Dyadobacter	Dyadobacter_beijingensis	9.69e-06
G	OTU_274	128	Bacteria	Proteobacteria	Gammaproteobacteria	Pseudomonadales	Moraxellaceae	EU636037_g	EF516037_s	0.000103412
G	OTU_277	94	Bacteria	Bacteroidetes	Flavobacteria	Flavobacteriales	Flavobacteriaceae	Flavobacterium	Flavobacterium_terrigena	7.59e-05
G	OTU_28	95	Bacteria	Proteobacteria	Alphaproteobacteria	Rhizobiales	Cohaesibacteraceae	NA	NA	7.68e-05
G	OTU_280	91	Bacteria	Bacteroidetes	Sphingobacteriia	Sphingobacteriales	Chitinophagaceae	Flavisolibacter	HM187310_s	7.35e-05
G	OTU_291	107	Bacteria	Bacteroidetes	Cytophagia	Cytophagales	Cytophagaceae	Chryseolinea	GQ487993_s	8.64e-05
G	OTU_295	16	Bacteria	Firmicutes	Bacilli	Bacillales	Bacillaceae	NA	NA	1.29e-05
G	OTU_310	16	Bacteria	Firmicutes	Clostridia	Clostridiales	Ruminococcaceae	Sporobacter	EF402484_s	1.29e-05
G	OTU_311	119	Bacteria	Proteobacteria	Gammaproteobacteria	Legionellales	Legionellaceae	Legionella	Legionella_lytica	9.61e-05
G	OTU_32	62	Bacteria	Proteobacteria	Alphaproteobacteria	Caulobacterales	Caulobacteraceae	Phenylobacterium	Phenylobacterium_haematophilum	5.01e-05
G	OTU_330	151	Bacteria	Proteobacteria	Alphaproteobacteria	Rhizobiales	Bradyrhizobiaceae	Bradyrhizobium	AZSJ_s	0.000121994
G	OTU_339	17	Bacteria	Proteobacteria	Betaproteobacteria	Burkholderiales	Ralstonia_f	Ralstonia	Ralstonia_insidiosa	1.37e-05
G	OTU_34	97377	Bacteria	Proteobacteria	Gammaproteobacteria	Pseudomonadales	Pseudomonadaceae	Pseudomonas	Pseudomonas sp.	0.0786717
G	OTU_340	5	Bacteria	Proteobacteria	Betaproteobacteria	Burkholderiales	Comamonadaceae	NA	NA	4.04e-06
G	OTU_348	78	Bacteria	Actinobacteria	Actinobacteria_c	Micrococcales	Microbacteriaceae	NA	NA	6.3e-05
G	OTU_352	19	Bacteria	Proteobacteria	Alphaproteobacteria	Rhizobiales	Methylobacteriaceae	Methylobacterium	Methylobacterium sp.	1.54e-05
G	OTU_36	3825	Bacteria	Proteobacteria	Alphaproteobacteria	Sphingomonadales	Sphingomonadaceae	Sphingomonas	Sphingomonas sp.	0.00309025
G	OTU_375	184	Bacteria	Actinobacteria	Actinobacteria_c	Frankiales	Geodermatophilaceae	Blastococcus	Blastococcus_aggregatus	0.000148655
G	OTU_38	72	Bacteria	Proteobacteria	Gammaproteobacteria	Chromatiales	NA	NA	NA	5.82e-05
G	OTU_397	14	Bacteria	Bacteroidetes	Bacteroidia	Bacteroidales	Porphyromonadaceae	Barnesiella	Barnesiella_intestinihominis	1.13e-05
G	OTU_4	864	Bacteria	Proteobacteria	Alphaproteobacteria	Sphingomonadales	Sphingomonadaceae	Sphingobium	Sphingobium_xenophagum/JEMV_s	0.000698033
G	OTU_40	3	Bacteria	Bacteroidetes	Flavobacteria	Flavobacteriales	Flavobacteriaceae	Flavobacterium	NA	2.42e-06
G	OTU_41	842	Bacteria	Proteobacteria	Alphaproteobacteria	Sphingomonadales	Sphingomonadaceae	Sphingomonas	NA	0.000680259
G	OTU_411	8	Bacteria	Firmicutes	Clostridia	Clostridiales	Ruminococcaceae	Oscillibacter	HQ400012_s	6.46e-06
G	OTU_412	121	Bacteria	Proteobacteria	Alphaproteobacteria	Sphingomonadales	Sphingomonadaceae	Sphingopyxis	Sphingopyxis sp.	9.78e-05
G	OTU_416	2	Bacteria	Firmicutes	Clostridia	Clostridiales	Lachnospiraceae	Agathobacter	Agathobacter_rectalis	1.62e-06
G	OTU_425	85	Bacteria	Proteobacteria	Alphaproteobacteria	Rhodospirillales	Acetobacteraceae	Roseomonas	Roseomonas_aquatica	6.87e-05
G	OTU_432	12	Bacteria	Proteobacteria	Alphaproteobacteria	Rhodospirillales	Acetobacteraceae	NA	NA	9.69e-06
G	OTU_44	7	Bacteria	Bacteroidetes	Flavobacteria	Flavobacteriales	Flavobacteriaceae	Flavobacterium	Flavobacterium_granuli	5.66e-06
G	OTU_458	37	Bacteria	Proteobacteria	Betaproteobacteria	Burkholderiales	Alcaligenaceae	Pigmentiphaga	Pigmentiphaga_litoralis	2.99e-05
G	OTU_476	37	Bacteria	Proteobacteria	Betaproteobacteria	Burkholderiales	Ralstonia_f	Cupriavidus	ALOU_s	2.99e-05
G	OTU_48	6576	Bacteria	Proteobacteria	Betaproteobacteria	Burkholderiales	Oxalobacteraceae	Noviherbaspirillum	Noviherbaspirillum_suwonense	0.00531281
G	OTU_488	22	Bacteria	Proteobacteria	Alphaproteobacteria	Rhodospirillales	Rhodospirillaceae	AB232813_g	AJ583166_s	1.78e-05
G	OTU_5	8	Bacteria	Proteobacteria	Alphaproteobacteria	Sphingomonadales	Sphingomonadaceae	Novosphingobium	NA	6.46e-06
G	OTU_502	12	Bacteria	Firmicutes	Bacilli	Lactobacillales	Streptococcaceae	Streptococcus	Streptococcus sp.	9.69e-06
G	OTU_515	84	Bacteria	Deinococcus-Thermus	Deinococci	Deinococcales	Deinococcaceae	Deinococcus	GQ072152_s	6.79e-05
G	OTU_531	2	Bacteria	Proteobacteria	Alphaproteobacteria	Caulobacterales	Caulobacteraceae	Brevundimonas	Brevundimonas_alba/Brevundimonas_denitrificans	1.62e-06
G	OTU_547	25	Bacteria	Bacteroidetes	Sphingobacteriia	CP012155_o	CP012155_f	JN038840_g	JN038840_s	2.02e-05
G	OTU_549	38	Bacteria	Planctomycetes	EU589258_c	EU589258_o	EU589258_f	JQ580347_g	JQ580347_s	3.07e-05
G	OTU_56	96	Bacteria	Proteobacteria	Alphaproteobacteria	Rhizobiales	Rhizobiaceae	Rhizobium	Rhizobium_nepotum/Rhizobium_radiobacter/CP002249_s	7.76e-05
G	OTU_577	6	Bacteria	Proteobacteria	Betaproteobacteria	Burkholderiales	Oxalobacteraceae	Massilia	NA	4.85e-06
G	OTU_580	1	Bacteria	Firmicutes	Tissierellia	Tissierellales	Peptoniphilaceae	Anaerococcus	HM587319_s	8.08e-07
G	OTU_588	18	Bacteria	Actinobacteria	Actinobacteria_c	Micrococcales	Micrococcaceae	Pseudarthrobacter/Arthrobacter	Pseudarthrobacter/Arthrobacter sp.	1.45e-05
G	OTU_589	32	Bacteria	Bacteroidetes	Cytophagia	Cytophagales	Cytophagaceae	Spirosoma	NA	2.59e-05
G	OTU_598	1053	Bacteria	Proteobacteria	Betaproteobacteria	Burkholderiales	Oxalobacteraceae	Massilia	NA	0.000850728
G	OTU_6	374810	Bacteria	Proteobacteria	Gammaproteobacteria	Pseudomonadales	Pseudomonadaceae	Pseudomonas	Pseudomonas_peli	0.302812
G	OTU_60	1535	Bacteria	Proteobacteria	Betaproteobacteria	Burkholderiales	Comamonadaceae	Aquabacterium	NA	0.00124014
G	OTU_605	8505	Bacteria	Proteobacteria	Alphaproteobacteria	Sphingomonadales	Sphingomonadaceae	Sphingopyxis	Sphingopyxis_witflariensis	0.00687126
G	OTU_606	48	Bacteria	Proteobacteria	Alphaproteobacteria	Rhodobacterales	Rhodobacteraceae	Rubellimicrobium	FM874293_s	3.88e-05
G	OTU_61	79	Bacteria	Proteobacteria	Gammaproteobacteria	Xanthomonadales	Xanthomonadaceae	Stenotrophomonas	NA	6.38e-05
G	OTU_614	27	Bacteria	Actinobacteria	Thermoleophilia	Solirubrobacterales	Conexibacteraceae	Conexibacter	FN811197_s	2.18e-05
G	OTU_615	7	Bacteria	Bacteroidetes	Bacteroidia	Bacteroidales	Bacteroidaceae	Bacteroides	Bacteroides_vulgatus	5.66e-06
G	OTU_625	1	Bacteria	Proteobacteria	Alphaproteobacteria	Sphingomonadales	Sphingomonadaceae	Sphingorhabdus	Sphingopyxis_contaminans	8.08e-07
G	OTU_639	7	Bacteria	Actinobacteria	Actinobacteria_c	Propionibacteriales	Propionibacteriaceae	Propionibacterium	Propionibacterium_acnes	5.66e-06
G	OTU_64	176	Bacteria	Proteobacteria	Alphaproteobacteria	Rhizobiales	Bradyrhizobiaceae	Bradyrhizobium	Bradyrhizobium sp.	0.000142192
G	OTU_641	19	Bacteria	Bacteroidetes	Flavobacteria	Flavobacteriales	Flavobacteriaceae	Flavobacterium	Flavobacterium_soli	1.54e-05
G	OTU_655	3	Bacteria	Proteobacteria	Gammaproteobacteria	Pseudomonadales	Pseudomonadaceae	Pseudomonas	Pseudomonas sp.	2.42e-06
G	OTU_66	1928	Bacteria	Proteobacteria	Betaproteobacteria	Burkholderiales	Comamonadaceae	Polaromonas	CP000316_s/AKIV_s	0.00155765
G	OTU_688	2	Bacteria	Proteobacteria	Alphaproteobacteria	Rhizobiales	Methylobacteriaceae	Psychroglaciecola	EU861971_s	1.62e-06
G	OTU_69	297	Bacteria	Bacteroidetes	Sphingobacteriia	Sphingobacteriales	Sphingobacteriaceae	Pedobacter	Pedobacter_lotistagni	0.000239949
G	OTU_691	576	Bacteria	Proteobacteria	Alphaproteobacteria	Sphingomonadales	Sphingomonadaceae	Sphingomonas	JF459933_s	0.000465355
G	OTU_7	8903	Bacteria	Bacteroidetes	Flavobacteria	Flavobacteriales	Flavobacteriaceae	Flavobacterium	NA	0.00719281
G	OTU_710	2	Bacteria	Proteobacteria	Betaproteobacteria	Burkholderiales	Comamonadaceae	NA	NA	1.62e-06
G	OTU_714	23	Bacteria	Actinobacteria	Actinobacteria_c	Micrococcales	Micrococcaceae	Rothia	Rothia_dentocariosa	1.86e-05
G	OTU_749	6	Bacteria	Bacteroidetes	Bacteroidia	Bacteroidales	Porphyromonadaceae	Parabacteroides	Parabacteroides_merdae	4.85e-06
G	OTU_785	190	Bacteria	Proteobacteria	Betaproteobacteria	Burkholderiales	Oxalobacteraceae	Noviherbaspirillum	NA	0.000153503
G	OTU_789	197	Bacteria	Proteobacteria	Gammaproteobacteria	Pseudomonadales	Moraxellaceae	Acinetobacter	NA	0.000159158
G	OTU_79	104	Bacteria	Proteobacteria	Betaproteobacteria	Burkholderiales	Oxalobacteraceae	Undibacterium	Undibacterium_parvum	8.4e-05
G	OTU_8	446	Bacteria	Proteobacteria	Alphaproteobacteria	Sphingomonadales	Sphingomonadaceae	Sphingomonas	Sphingomonas_histidinilytica	0.000360327
G	OTU_81	7	Bacteria	Proteobacteria	Alphaproteobacteria	Rhizobiales	Bosea_f	Bosea	Bosea_lathyri	5.66e-06
G	OTU_820	483	Bacteria	Proteobacteria	Betaproteobacteria	Burkholderiales	Comamonadaceae	Variovorax	Variovorax_ginsengisoli	0.00039022
G	OTU_829	12	Bacteria	Bacteroidetes	Sphingobacteriia	Sphingobacteriales	Chitinophagaceae	EU104210_g	NA	9.69e-06
G	OTU_837	11	Bacteria	Bacteroidetes	Flavobacteria	Flavobacteriales	Flavobacteriaceae	Flavobacterium	NA	8.89e-06
G	OTU_840	16	Bacteria	Proteobacteria	Deltaproteobacteria	Bdellovibrionales	Bacteriovoracaceae	Peredibacter	NA	1.29e-05
G	OTU_843	3	Bacteria	Bacteroidetes	Bacteroidia	Bacteroidales	Porphyromonadaceae	Parabacteroides	Parabacteroides_distasonis	2.42e-06
G	OTU_844	23	Bacteria	Deinococcus-Thermus	Deinococci	Deinococcales	Deinococcaceae	Deinococcus	Deinococcus_aquaticus	1.86e-05
G	OTU_846	6	Bacteria	Bacteroidetes	Bacteroidia	Bacteroidales	Rikenellaceae	Alistipes	Alistipes_inops	4.85e-06
G	OTU_849	12	Bacteria	Bacteroidetes	Cytophagia	Cytophagales	Cytophagaceae	GU454944_g	EF516475_s	9.69e-06
G	OTU_85	1011	Bacteria	Proteobacteria	Gammaproteobacteria	Xanthomonadales	Xanthomonadaceae	Stenotrophomonas	LATR_s	0.000816795
G	OTU_857	20	Bacteria	Cyanobacteria	Vampirovibrio_c	FR888536_o	FR888536_f	FR888536_g	HF996393_s	1.62e-05
G	OTU_86	277	Bacteria	Proteobacteria	Gammaproteobacteria	Xanthomonadales	Xanthomonadaceae	Pseudoxanthomonas	Pseudoxanthomonas_mexicana	0.000223791
G	OTU_87	5	Bacteria	Bacteroidetes	Bacteroidia	Bacteroidales	Bacteroidaceae	Bacteroides	Bacteroides_uniformis	4.04e-06
G	OTU_877	9	Bacteria	Firmicutes	Clostridia	Clostridiales	Ruminococcaceae	Oscillibacter	GQ896991_s	7.27e-06
G	OTU_907	42	Bacteria	Planctomycetes	Planctomycetia	Planctomycetales	Planctomycetaceae	AY234711_g	AB630606_s	3.39e-05
G	OTU_925	10	Bacteria	Firmicutes	Clostridia	Clostridiales	Christensenellaceae	HQ716403_g	NA	8.08e-06
G	OTU_94	36	Bacteria	Actinobacteria	Actinobacteria_c	Corynebacteriales	Mycobacteriaceae	Mycobacterium	NA	2.91e-05
G	OTU_951	6	Bacteria	Proteobacteria	Gammaproteobacteria	Pseudomonadales	Pseudomonadaceae	Pseudomonas	Pseudomonas_aeruginosa	4.85e-06
G	OTU_956	4	Bacteria	Proteobacteria	Alphaproteobacteria	Rhizobiales	Bradyrhizobiaceae	Rhodopseudomonas	NA	3.23e-06
G	OTU_964	53	Bacteria	Proteobacteria	Alphaproteobacteria	Sphingomonadales	Sphingomonadaceae	Sphingobium	Sphingobium_limneticum	4.28e-05
G	OTU_989	8	Bacteria	Bacteroidetes	Sphingobacteriia	Sphingobacteriales	Sphingobacteriaceae	Pedobacter	Pedobacter_heparinus	6.46e-06
G	OTU_993	25	Bacteria	Actinobacteria	Actinobacteria_c	Micrococcales	Microbacteriaceae	Naasia	Naasia_aerilata	2.02e-05
H	OTU_1	18794	Bacteria	Proteobacteria	Gammaproteobacteria	Pseudomonadales	Pseudomonadaceae	Pseudomonas	Pseudomonas sp.	0.0106155
H	OTU_10	1021	Bacteria	Proteobacteria	Alphaproteobacteria	Rhizobiales	Phreatobacter_f	Phreatobacter	DQ088783_s	0.000576698
H	OTU_100	1467	Bacteria	Planctomycetes	EU589258_c	EU589258_o	EU589258_f	GU230455_g	JQ678402_s	0.000828615
H	OTU_1000	23	Bacteria	Proteobacteria	Betaproteobacteria	CP012157_o	CP012157_f	AB552866_g	AB552866_s	1.3e-05
H	OTU_1001	142	Bacteria	Proteobacteria	Alphaproteobacteria	Rhizobiales	Hyphomicrobiaceae	Hyphomicrobium	NA	8.02e-05
H	OTU_1002	12	Bacteria	Proteobacteria	Gammaproteobacteria	Legionellales	Legionellaceae	Legionella	NA	6.78e-06
H	OTU_1003	8	Bacteria	Cyanobacteria	JQ650114_c	JQ650114_o	JQ650114_f	JQ650114_g	AY945890_s	4.52e-06
H	OTU_1005	8	Bacteria	Proteobacteria	Gammaproteobacteria	Legionellales	Coxiellaceae	AB636978_g	AB636978_s	4.52e-06
H	OTU_1006	11	Bacteria	Verrucomicrobia	Opitutae	FN377789_o	NA	NA	NA	6.21e-06
H	OTU_1007	17	Bacteria	Planctomycetes	OM190_c	OM190_o	OM190_f	OM190_g	EU135195_s	9.6e-06
H	OTU_1008	17	Bacteria	Parcubacteria_OD1	Paceibacter_c	CP011215_o	CP011215_f	NA	NA	9.6e-06
H	OTU_1009	11	Bacteria	Proteobacteria	Gammaproteobacteria	Methylococcales	Methylomonas_f	Methylomonas	Methylomonas_methanica/AQOV_s	6.21e-06
H	OTU_101	2406	Bacteria	Proteobacteria	Alphaproteobacteria	DQ486506_o	DQ486506_f	AY625147_g	AY625147_s	0.001359
H	OTU_1010	311	Bacteria	Planctomycetes	Planctomycetia	Planctomycetales	Planctomycetaceae	Bythopirellula	X81947_s	0.000175664
H	OTU_1011	15	Bacteria	Verrucomicrobia	Verrucomicrobiae	Pedosphaera_o	Pedosphaera_f	NA	NA	8.47e-06
H	OTU_1012	13	Bacteria	Proteobacteria	Deltaproteobacteria	Bdellovibrionales	Bdellovibrionaceae	HQ114176_g	EF516801_s	7.34e-06
H	OTU_1013	9	Bacteria	Proteobacteria	Deltaproteobacteria	Bdellovibrionales	FJ889281_f	FJ889281_g	NA	5.08e-06
H	OTU_1014	7	Bacteria	Bacteroidetes	Bacteroidia	Bacteroidales	Bacteroidaceae	Bacteroides	NA	3.95e-06
H	OTU_1015	234	Bacteria	Proteobacteria	Alphaproteobacteria	Sphingomonadales	Sphingomonadaceae	Sphingomonas	NA	0.000132172
H	OTU_1016	4	Bacteria	Proteobacteria	Deltaproteobacteria	Myxococcales	Haliangiaceae	Haliangium	HQ118510_s	2.26e-06
H	OTU_1017	17	Bacteria	Acidobacteria	Blastocatellia	Blastocatellales	EU335275_f	GQ500851_g	GQ500851_s	9.6e-06
H	OTU_1018	6	Bacteria	Proteobacteria	Gammaproteobacteria	Legionellales	Coxiellaceae	HQ738650_g	NA	3.39e-06
H	OTU_1019	6	Bacteria	Planctomycetes	Planctomycetia	Planctomycetales	Gemmata_f	FJ466217_g	NA	3.39e-06
H	OTU_102	979	Bacteria	Proteobacteria	Alphaproteobacteria	Rhodospirillales	Rhodospirillaceae	EU800921_g	EU800921_s	0.000552975
H	OTU_1020	555	Bacteria	Proteobacteria	Betaproteobacteria	Burkholderiales	Comamonadaceae	Rhizobacter	Rhizobacter_bergeniae	0.000313484
H	OTU_1021	6	Bacteria	Proteobacteria	Gammaproteobacteria	NA	NA	NA	NA	3.39e-06
H	OTU_1022	10	Bacteria	Chlamydiae	Chlamydiae_c	Chlamydiales	EU363464_f	EU363464_g	NA	5.65e-06
H	OTU_1023	6	Bacteria	Chlamydiae	Chlamydiae_c	Chlamydiales	Criblamydiaceae	Criblamydia	JN538005_s	3.39e-06
H	OTU_1024	5	Bacteria	Bacteroidetes	Flavobacteria	Flavobacteriales	Flavobacteriaceae	Chryseobacterium	JN090825_s	2.82e-06
H	OTU_1025	4	Bacteria	Proteobacteria	Alphaproteobacteria	NA	NA	NA	NA	2.26e-06
H	OTU_1026	2	Bacteria	Cyanobacteria	FJ810552_c	FJ810552_o	FJ425638_f	HQ386626_g	JX105663_s	1.13e-06
H	OTU_1027	20	Bacteria	Planctomycetes	AJ224943_c	AJ224943_o	AJ224943_f	AJ224943_g	NA	1.13e-05
H	OTU_1029	3	Bacteria	Omnitrophica_OP3	AQSZ_c	AQSZ_o	AQSZ_f	AQSZ_g	NA	1.69e-06
H	OTU_103	831	Bacteria	Cyanobacteria	JQ650114_c	JQ650114_o	JQ650114_f	JQ650114_g	PAC000546_s	0.000469379
H	OTU_1030	5	Bacteria	Proteobacteria	Alphaproteobacteria	Rickettsiales	Holosporaceae	AB240378_g	AB240378_s	2.82e-06
H	OTU_1031	9	Bacteria	Planctomycetes	Planctomycetia	Planctomycetales	Gemmata_f	EF494332_g	NA	5.08e-06
H	OTU_1032	3	Bacteria	Proteobacteria	Alphaproteobacteria	Rhodobacterales	Hyphomonadaceae	CP012156_g	JF421149_s	1.69e-06
H	OTU_1033	4	Bacteria	Bacteroidetes	Flavobacteria	Flavobacteriales	Flavobacteriaceae	Cloacibacterium	Cloacibacterium_normanense	2.26e-06
H	OTU_1034	4	Bacteria	Chlamydiae	Chlamydiae_c	Chlamydiales	NA	NA	NA	2.26e-06
H	OTU_1035	4	Bacteria	Proteobacteria	Alphaproteobacteria	Rhodospirillales	EF032738_f	EF032738_g	PAC000647_s	2.26e-06
H	OTU_1036	12	Bacteria	Planctomycetes	Planctomycetia	Planctomycetales	Planctomycetaceae	EU881226_g	NA	6.78e-06
H	OTU_1037	12	Bacteria	Proteobacteria	Deltaproteobacteria	Myxococcales	NA	NA	NA	6.78e-06
H	OTU_1038	23	Bacteria	Proteobacteria	Deltaproteobacteria	FM253572_o	FM253572_f	FJ478897_g	AF234748_s	1.3e-05
H	OTU_1039	2	Bacteria	Proteobacteria	Alphaproteobacteria	Rhodospirillales	Rhodospirillaceae	JF922455_g	EU786144_s	1.13e-06
H	OTU_104	1436	Bacteria	Proteobacteria	Alphaproteobacteria	Rhizobiales	Bradyrhizobiaceae	Pseudorhodoplanes	FJ478588_s	0.000811105
H	OTU_1040	3	Bacteria	Proteobacteria	Alphaproteobacteria	Sphingomonadales	Sphingomonadaceae	Sphingomonas	NA	1.69e-06
H	OTU_1041	8	Bacteria	Nitrospirae	Nitrospira_c	Nitrospirales	HM185998_f	HM185998_g	HM185998_s	4.52e-06
H	OTU_1042	23	Bacteria	Proteobacteria	Betaproteobacteria	Burkholderiales	Comamonadaceae	Acidovorax	DF238959_s	1.3e-05
H	OTU_1043	8	Bacteria	Proteobacteria	Alphaproteobacteria	Sphingomonadales	Sphingomonadaceae	Sphingobium	NA	4.52e-06
H	OTU_1044	8	Bacteria	Proteobacteria	Deltaproteobacteria	Myxococcales	Haliangiaceae	EU589248_g	NA	4.52e-06
H	OTU_1045	895	Bacteria	Proteobacteria	Deltaproteobacteria	FM253572_o	FM253572_f	EU881241_g	EU881241_s	0.000505529
H	OTU_1046	13	Bacteria	Proteobacteria	Betaproteobacteria	Burkholderiales	Oxalobacteraceae	Undibacterium	Undibacterium_seohonense	7.34e-06
H	OTU_1047	5	Bacteria	Proteobacteria	Alphaproteobacteria	Rhodospirillales	Rhodospirillaceae	EU801583_g	EU801583_s	2.82e-06
H	OTU_1048	3	Bacteria	Firmicutes	Tissierellia	Tissierellales	Sedimentibacter_f	Sedimentibacter	AY221992_s	1.69e-06
H	OTU_1049	4	Bacteria	Proteobacteria	Gammaproteobacteria	Legionellales	Coxiellaceae	EU800584_g	EU800584_s	2.26e-06
H	OTU_105	706	Bacteria	Acidobacteria	Blastocatellia	Blastocatellales	Blastocatellaceae	Stenotrophobacter	HQ190266_s	0.000398775
H	OTU_1050	22	Bacteria	Proteobacteria	Deltaproteobacteria	FM253572_o	FM253572_f	FJ478897_g	JN615775_s	1.24e-05
H	OTU_1051	6	Bacteria	Elusimicrobia	Elusimicrobia_c	EU861834_o	EU861834_f	EU861834_g	NA	3.39e-06
H	OTU_1052	3	Bacteria	Elusimicrobia	Elusimicrobia_c	EU861834_o	NA	NA	NA	1.69e-06
H	OTU_1053	3	Bacteria	Planctomycetes	Planctomycetia	Planctomycetales	Planctomycetaceae	AY913229_g	EF540354_s	1.69e-06
H	OTU_1054	3	Bacteria	Parcubacteria_OD1	Paceibacter_c	CP011215_o	CP011215_f	LBRP_g	JN038877_s	1.69e-06
H	OTU_1055	4	Bacteria	Parcubacteria_OD1	LCGL_c	LCGL_o	JF497854_f	NA	NA	2.26e-06
H	OTU_1056	18	Bacteria	Planctomycetes	Planctomycetia	Planctomycetales	Planctomycetaceae	AY913229_g	NA	1.02e-05
H	OTU_1057	25	Bacteria	Planctomycetes	OM190_c	OM190_o	OM190_f	OM190_g	AB630881_s	1.41e-05
H	OTU_1058	9	Bacteria	Proteobacteria	Deltaproteobacteria	Myxococcales	Polyangiaceae	Labilithrix	NA	5.08e-06
H	OTU_1059	7	Bacteria	Bacteroidetes	Bacteroidia	Bacteroidales	Prolixibacteraceae	AJ229237_g	EF562567_s	3.95e-06
H	OTU_106	540	Bacteria	Proteobacteria	Alphaproteobacteria	Rhodospirillales	Micavibrio_f	Micavibrio	CP003538_s	0.000305012
H	OTU_1060	1	Bacteria	Proteobacteria	Alphaproteobacteria	Sphingomonadales	Erythrobacteraceae	Altererythrobacter	Altererythrobacter_troitsensis	5.65e-07
H	OTU_1061	6	Bacteria	Planctomycetes	Phycisphaerae	Phycisphaerales	Phycisphaeraceae	EU735627_g	AB630627_s	3.39e-06
H	OTU_1062	55	Bacteria	Proteobacteria	Alphaproteobacteria	Rhizobiales	Parvibaculum_f	Parvibaculum	DQ015855_s	3.11e-05
H	OTU_1063	3	Bacteria	Proteobacteria	Deltaproteobacteria	Bdellovibrionales	Bdellovibrionaceae	EU104230_g	NA	1.69e-06
H	OTU_1064	6	Bacteria	Planctomycetes	Planctomycetia	Planctomycetales	Gemmata_f	FJ625346_g	FJ625346_s	3.39e-06
H	OTU_1066	4	Bacteria	Proteobacteria	Deltaproteobacteria	Bdellovibrionales	AB630788_f	AB630788_g	AB630788_s	2.26e-06
H	OTU_1067	17	Bacteria	Proteobacteria	Gammaproteobacteria	Legionellales	Legionellaceae	Legionella	NA	9.6e-06
H	OTU_1069	14	Bacteria	Acidobacteria	Blastocatellia	Blastocatellales	EU335275_f	EU335275_g	NA	7.91e-06
H	OTU_1071	15	Bacteria	Cyanobacteria	JQ650114_c	JQ650114_o	JQ650114_f	JQ650114_g	PAC000348_s	8.47e-06
H	OTU_1072	10	Bacteria	Proteobacteria	Gammaproteobacteria	Xanthomonadales	Xanthomonadaceae	EU104217_g	AB478683_s	5.65e-06
H	OTU_1073	6	Bacteria	Bacteroidetes	Flavobacteria	Flavobacteriales	Flavobacteriaceae	Flavobacterium	NA	3.39e-06
H	OTU_1074	39	Bacteria	Proteobacteria	Betaproteobacteria	Burkholderiales	Oxalobacteraceae	Massilia	NA	2.2e-05
H	OTU_1075	13	Bacteria	Planctomycetes	Planctomycetia	Planctomycetales	Planctomycetaceae	Planctopirus	AB630594_s	7.34e-06
H	OTU_1076	22	Bacteria	Planctomycetes	OM190_c	OM190_o	OM190_f	OM190_g	NA	1.24e-05
H	OTU_1078	5	Bacteria	Chlamydiae	Chlamydiae_c	Chlamydiales	Parachlamydiaceae	Protochlamydia	NA	2.82e-06
H	OTU_1079	3	Bacteria	Planctomycetes	OM190_c	OM190_o	OM190_f	OM190_g	FJ208815_s	1.69e-06
H	OTU_108	617	Bacteria	Proteobacteria	Gammaproteobacteria	Legionellales	Coxiellaceae	FJ517701_g	NA	0.000348504
H	OTU_1080	2	Bacteria	Chlamydiae	Chlamydiae_c	Chlamydiales	Criblamydiaceae	Criblamydia	JN538005_s	1.13e-06
H	OTU_1081	8	Bacteria	Proteobacteria	Gammaproteobacteria	Legionellales	Legionellaceae	Legionella	NA	4.52e-06
H	OTU_1082	7	Bacteria	Proteobacteria	Betaproteobacteria	Rhodocyclales	Rhodocyclaceae	Zoogloea	Zoogloea_oleivorans	3.95e-06
H	OTU_1083	12	Bacteria	Proteobacteria	Gammaproteobacteria	Legionellales	Coxiellaceae	NA	NA	6.78e-06
H	OTU_1084	3	Bacteria	Proteobacteria	Deltaproteobacteria	Bdellovibrionales	Bdellovibrionaceae	JX489852_g	NA	1.69e-06
H	OTU_1085	16	Bacteria	Proteobacteria	Alphaproteobacteria	Rhodospirillales	Rhodospirillaceae	Dongia	JN616154_s	9.04e-06
H	OTU_1086	2	Bacteria	Proteobacteria	Alphaproteobacteria	Rickettsiales	NA	NA	NA	1.13e-06
H	OTU_1087	13	Bacteria	Proteobacteria	Gammaproteobacteria	Legionellales	Coxiellaceae	NA	NA	7.34e-06
H	OTU_1088	4	Bacteria	Proteobacteria	Alphaproteobacteria	Sphingomonadales	Sphingomonadaceae	Sphingobium	Sphingobium_xenophagum/JEMV_s	2.26e-06
H	OTU_1089	7	Bacteria	Planctomycetes	Planctomycetia	Planctomycetales	Planctomycetaceae	AY913229_g	EU589315_s	3.95e-06
H	OTU_109	705	Bacteria	Acidobacteria	Solibacteres	Solibacterales	Solibacteraceae	DQ648914_g	DQ648914_s	0.00039821
H	OTU_1090	6	Bacteria	Proteobacteria	Gammaproteobacteria	Legionellales	Coxiellaceae	Coxiella	NA	3.39e-06
H	OTU_1091	7	Bacteria	Verrucomicrobia	Verrucomicrobiae	Pedosphaera_o	Pedosphaera_f	NA	NA	3.95e-06
H	OTU_1092	9	Bacteria	Planctomycetes	Planctomycetia	Planctomycetales	Gemmata_f	EF580943_g	HM007531_s	5.08e-06
H	OTU_1093	145	Bacteria	Cyanobacteria	JQ650114_c	JQ650114_o	JQ650114_f	JQ650114_g	AY375144_s	8.19e-05
H	OTU_1094	10	Bacteria	Proteobacteria	Alphaproteobacteria	Rickettsiales	FJ478621_f	NA	NA	5.65e-06
H	OTU_1095	32	Bacteria	Bacteroidetes	Cytophagia	Cytophagales	Cytophagaceae	JF703303_g	JF703303_s	1.81e-05
H	OTU_1096	2	Bacteria	Proteobacteria	Epsilonproteobacteria	Campylobacterales	Sulfurimonas_f	Sulfurimonas	NA	1.13e-06
H	OTU_1097	5	Bacteria	Proteobacteria	Alphaproteobacteria	NA	NA	NA	NA	2.82e-06
H	OTU_1098	2	Bacteria	Planctomycetes	OM190_c	OM190_o	OM190_f	OM190_g	NA	1.13e-06
H	OTU_1099	5	Bacteria	Peregrinibacteria	Peribacteria	LBOR_o	EU246208_f	FJ497601_g	NA	2.82e-06
H	OTU_11	99467	Bacteria	Proteobacteria	Betaproteobacteria	Thiobacillus_o	Thiobacillus_f	Thiobacillus	Thiobacillus_thioparus	0.0561826
H	OTU_110	603	Bacteria	Proteobacteria	Betaproteobacteria	DQ395705_o	DQ395705_f	DQ395705_g	GQ156841_s	0.000340596
H	OTU_1100	6	Bacteria	Proteobacteria	Deltaproteobacteria	Bdellovibrionales	CU925466_f	NA	NA	3.39e-06
H	OTU_1101	12	Bacteria	Planctomycetes	Planctomycetia	Planctomycetales	Gemmata_f	NA	NA	6.78e-06
H	OTU_1102	2	Bacteria	Parcubacteria_OD1	Paceibacter_c	CP011209_o	NA	NA	NA	1.13e-06
H	OTU_1103	13	Bacteria	Proteobacteria	Alphaproteobacteria	Rickettsiales	Paracaedibacteraceae	AY947895_g	AY947895_s	7.34e-06
H	OTU_1105	7	Bacteria	Proteobacteria	Alphaproteobacteria	Sphingomonadales	Sphingomonadaceae	Sphingomonas	NA	3.95e-06
H	OTU_1106	7	Bacteria	Proteobacteria	Betaproteobacteria	Sterolibacterium_o	Sterolibacterium_f	AB186832_g	NA	3.95e-06
H	OTU_1107	11	Bacteria	Verrucomicrobia	Opitutae	FN377789_o	NA	NA	NA	6.21e-06
H	OTU_1108	8	Bacteria	Actinobacteria	Rubrobacteria	Gaiellales	Gaiellaceae	Gaiella	HM187389_s	4.52e-06
H	OTU_1109	5857	Bacteria	Proteobacteria	Betaproteobacteria	Burkholderiales	Comamonadaceae	Rhizobacter	Rhizobacter_fulvus	0.00330825
H	OTU_111	1782	Bacteria	Proteobacteria	Alphaproteobacteria	Rhizobiales	Hyphomicrobiaceae	Hyphomicrobium	DQ814766_s	0.00100654
H	OTU_1110	8	Bacteria	Planctomycetes	Planctomycetia	Planctomycetales	Gemmata_f	EF494332_g	NA	4.52e-06
H	OTU_1111	6	Bacteria	Proteobacteria	Deltaproteobacteria	OM27	U70713_f	DQ017948_g	GQ500842_s	3.39e-06
H	OTU_1112	8	Bacteria	Proteobacteria	Deltaproteobacteria	Myxococcales	Haliangiaceae	EU589248_g	EU937912_s	4.52e-06
H	OTU_1113	4	Bacteria	Planctomycetes	EU385896_c	EU385896_o	EF019689_f	EF019689_g	JN408954_s	2.26e-06
H	OTU_1114	5	Bacteria	Proteobacteria	Betaproteobacteria	Gallionellales	Gallionellaceae	NA	NA	2.82e-06
H	OTU_1115	4	Bacteria	Parcubacteria_OD1	Paceibacter_c	CP011215_o	CP011215_f	NA	NA	2.26e-06
H	OTU_1116	5	Bacteria	Proteobacteria	Deltaproteobacteria	FM253572_o	FM253606_f	FM253606_g	JF830203_s	2.82e-06
H	OTU_1117	9	Bacteria	Nitrospirae	Nitrospira_c	Nitrospirales	DQ058677_f	DQ058677_g	DQ058677_s	5.08e-06
H	OTU_1118	6	Bacteria	Actinobacteria	Actinobacteria_c	Planktophila_o	Planktophila_f	Planktophila	FJ810555_s	3.39e-06
H	OTU_1119	40	Bacteria	Verrucomicrobia	Verrucomicrobiae	Pedosphaera_o	Pedosphaera_f	NA	NA	2.26e-05
H	OTU_112	909	Bacteria	Planctomycetes	Planctomycetia	Planctomycetales	Planctomycetaceae	AY913229_g	AB630607_s	0.000513436
H	OTU_1120	7	Bacteria	Proteobacteria	Alphaproteobacteria	Parvularculales	Parvularculaceae	AY625139_g	AY625139_s	3.95e-06
H	OTU_1121	3	Bacteria	Proteobacteria	Gammaproteobacteria	Legionellales	Legionellaceae	Fluoribacter	Fluoribacter_gormanii	1.69e-06
H	OTU_1123	9	Bacteria	Bacteroidetes	Flavobacteria	Flavobacteriales	AJ224942_f	HQ163424_g	HQ163424_s	5.08e-06
H	OTU_1124	5	Bacteria	Bacteroidetes	Flavobacteria	Flavobacteriales	Flavobacteriaceae	Flavobacterium	HM776988_s	2.82e-06
H	OTU_1125	9	Bacteria	Chlamydiae	Chlamydiae_c	Chlamydiales	Rhabdochlamydiaceae	Rhabdochlamydia	NA	5.08e-06
H	OTU_1126	2	Bacteria	Proteobacteria	Gammaproteobacteria	Acidiferrobacterales	Acidiferrobacteraceae	NA	NA	1.13e-06
H	OTU_1127	3	Bacteria	Proteobacteria	Oligoflexia	Oligoflexales	Oligoflexaceae	EU803555_g	NA	1.69e-06
H	OTU_1128	5	Bacteria	Proteobacteria	Gammaproteobacteria	Legionellales	Legionellaceae	Legionella	NA	2.82e-06
H	OTU_113	739	Bacteria	Bacteroidetes	Sphingobacteriia	HQ178786_o	FJ793180_f	FJ793180_g	NA	0.000417414
H	OTU_1130	15	Bacteria	Chlamydiae	Chlamydiae_c	Chlamydiales	NA	NA	NA	8.47e-06
H	OTU_1131	32	Bacteria	Actinobacteria	Actinobacteria_c	Corynebacteriales	Mycobacteriaceae	Mycobacterium	NA	1.81e-05
H	OTU_1132	2	Bacteria	Bacteroidetes	Bacteroidia	Bacteroidales	Rikenellaceae	Alistipes	Alistipes_finegoldii	1.13e-06
H	OTU_1133	6	Bacteria	Planctomycetes	Planctomycetia	Planctomycetales	Planctomycetaceae	AB630886_g	AB630886_s	3.39e-06
H	OTU_1134	171	Bacteria	Planctomycetes	EU589258_c	EU589258_o	EU589258_f	GU230455_g	NA	9.66e-05
H	OTU_1135	90	Bacteria	Proteobacteria	Alphaproteobacteria	Sphingomonadales	Sphingomonadaceae	Sphingobium	NA	5.08e-05
H	OTU_1136	8	Bacteria	Proteobacteria	Gammaproteobacteria	Legionellales	Coxiellaceae	NA	NA	4.52e-06
H	OTU_1137	5	Bacteria	Bacteroidetes	Bacteroidia	Bacteroidales	Bacteroidaceae	Bacteroides	Bacteroides_fragilis	2.82e-06
H	OTU_1138	7	Bacteria	Proteobacteria	Alphaproteobacteria	Sphingomonadales	Sphingomonadaceae	Sphingorhabdus	NA	3.95e-06
H	OTU_1139	6	Bacteria	Proteobacteria	Oligoflexia	Oligoflexales	Oligoflexaceae	AB630496_g	HQ114109_s	3.39e-06
H	OTU_114	115	Bacteria	Proteobacteria	Alphaproteobacteria	Caulobacterales	Caulobacteraceae	Brevundimonas	Brevundimonas_nasdae/Brevundimonas_albigilva/Brevundimonas_vesicularis	6.5e-05
H	OTU_1140	18	Bacteria	Verrucomicrobia	Verrucomicrobiae	Methylacidiphilales	EU680463_f	AY661973_g	AY661973_s	1.02e-05
H	OTU_1141	5	Bacteria	Saccharibacteria_TM7	Saccharimonas_c	Saccharimonas_o	JF421159_f	JF421159_g	PAC000448_s	2.82e-06
H	OTU_1142	9	Bacteria	Proteobacteria	Alphaproteobacteria	Rhodospirillales	Rhodospirillaceae	NA	NA	5.08e-06
H	OTU_1143	3	Bacteria	Proteobacteria	Alphaproteobacteria	Rickettsiales	Rickettsiaceae	DQ833504_g	JF016919_s	1.69e-06
H	OTU_1145	5	Bacteria	Proteobacteria	Gammaproteobacteria	Legionellales	Legionellaceae	Legionella	NA	2.82e-06
H	OTU_1146	10	Bacteria	Proteobacteria	Betaproteobacteria	Neisseriales	GU199451_f	DQ984558_g	NA	5.65e-06
H	OTU_1147	4	Bacteria	TM6	TM6_c	Babela_o	ARQD_f	ARQD_g	ARQD_s	2.26e-06
H	OTU_1148	9	Bacteria	Bacteroidetes	Sphingobacteriia	HQ178786_o	HQ178786_f	HQ178786_g	NA	5.08e-06
H	OTU_1149	3	Bacteria	Proteobacteria	Alphaproteobacteria	Rhodospirillales	EF032738_f	AY662029_g	NA	1.69e-06
H	OTU_115	493	Bacteria	Proteobacteria	Gammaproteobacteria	Legionellales	Legionellaceae	Legionella	NA	0.000278464
H	OTU_1150	12	Bacteria	Proteobacteria	Betaproteobacteria	DQ009366_o	DQ009366_f	AY532565_g	AY532565_s	6.78e-06
H	OTU_1151	8	Bacteria	NA	NA	NA	NA	NA	NA	4.52e-06
H	OTU_1152	23	Bacteria	Proteobacteria	Alphaproteobacteria	Rickettsiales	Paracaedibacteraceae	EF667926_g	GQ500786_s	1.3e-05
H	OTU_1153	3	Bacteria	Bacteroidetes	Sphingobacteriia	HQ178786_o	FJ793180_f	NA	NA	1.69e-06
H	OTU_1154	9	Bacteria	Proteobacteria	Gammaproteobacteria	Legionellales	Coxiellaceae	NA	NA	5.08e-06
H	OTU_1156	5	Bacteria	Proteobacteria	Gammaproteobacteria	Legionellales	Legionellaceae	Legionella	NA	2.82e-06
H	OTU_1157	5	Bacteria	Proteobacteria	Deltaproteobacteria	EU617842_o	EU617842_f	EU881182_g	HQ864112_s	2.82e-06
H	OTU_1158	3	Bacteria	Proteobacteria	Alphaproteobacteria	Caulobacterales	Caulobacteraceae	Brevundimonas	Brevundimonas_halotolerans	1.69e-06
H	OTU_1159	6	Bacteria	Cyanobacteria	Vampirovibrio_c	FR888536_o	FR888536_f	FR888536_g	FR888536_s	3.39e-06
H	OTU_116	501	Bacteria	Bacteroidetes	Cytophagia	Cytophagales	Cytophagaceae	Cytophaga	Cytophaga_aurantiaca	0.000282983
H	OTU_1160	9	Bacteria	Proteobacteria	Betaproteobacteria	Neisseriales	GU199451_f	DQ984558_g	FJ517678_s	5.08e-06
H	OTU_1162	3	Bacteria	Parcubacteria_OD1	Paceibacter_c	CP011215_o	CP011215_f	NA	NA	1.69e-06
H	OTU_1163	6	Bacteria	Acidobacteria	Holophagae	Acanthopleuribacterales	Acanthopleuribacteraceae	Acanthopleuribacter	NA	3.39e-06
H	OTU_1164	13	Bacteria	Proteobacteria	Deltaproteobacteria	Myxococcales	Haliangiaceae	EU589248_g	NA	7.34e-06
H	OTU_1165	62	Bacteria	Proteobacteria	Gammaproteobacteria	Chromatiales	EF157132_f	DQ378269_g	DQ378269_s	3.5e-05
H	OTU_1166	17	Bacteria	Omnitrophica_OP3	AY373410_c	AY373410_o	EU881347_f	EU881347_g	NA	9.6e-06
H	OTU_1167	1	Bacteria	Firmicutes	Clostridia	Clostridiales	Lachnospiraceae	Lachnospira	Lachnospira_pectinoschiza	5.65e-07
H	OTU_1168	4	Bacteria	Proteobacteria	Betaproteobacteria	NA	NA	NA	NA	2.26e-06
H	OTU_1169	9	Bacteria	Planctomycetes	Phycisphaerae	HQ697838_o	HM066343_f	HM066343_g	NA	5.08e-06
H	OTU_117	609	Bacteria	Proteobacteria	Alphaproteobacteria	Rhodospirillales	AY945895_f	AY945895_g	JF098936_s	0.000343985
H	OTU_1170	10	Bacteria	Proteobacteria	Alphaproteobacteria	Rhodobacterales	Hyphomonadaceae	CP012156_g	DQ376579_s	5.65e-06
H	OTU_1171	4	Bacteria	Proteobacteria	Alphaproteobacteria	NA	NA	NA	NA	2.26e-06
H	OTU_1172	6	Bacteria	Planctomycetes	Planctomycetia	Planctomycetales	Planctomycetaceae	AY328798_g	AY625135_s	3.39e-06
H	OTU_1173	10	Bacteria	Actinobacteria	Actinobacteria_c	Frankiales	Frankiaceae	Jatrophihabitans	AM697003_s	5.65e-06
H	OTU_1174	5	Bacteria	Proteobacteria	Alphaproteobacteria	Rhizobiales	Bradyrhizobiaceae	Bradyrhizobium	AZSJ_s	2.82e-06
H	OTU_1175	2	Bacteria	Proteobacteria	Alphaproteobacteria	Rickettsiales	Midichloriaceae	JSWE_g	NA	1.13e-06
H	OTU_1176	4	Bacteria	Proteobacteria	Alphaproteobacteria	Caulobacterales	Caulobacteraceae	Caulobacter	Caulobacter_profunda	2.26e-06
H	OTU_1177	3	Bacteria	Bacteroidetes	Flavobacteria	Flavobacteriales	Flavobacteriaceae	Flavobacterium	NA	1.69e-06
H	OTU_1178	5	Bacteria	Cyanobacteria	FJ810552_c	FJ810552_o	FJ425638_f	HQ386626_g	JX105663_s	2.82e-06
H	OTU_1179	22	Bacteria	Proteobacteria	Alphaproteobacteria	Rhodobacterales	Hyphomonadaceae	CP012156_g	JN245761_s	1.24e-05
H	OTU_118	596	Bacteria	Proteobacteria	Alphaproteobacteria	Rhodobacterales	Rhodobacteraceae	Gemmobacter	GQ396845_s	0.000336643
H	OTU_1180	9	Bacteria	Chloroflexi	GQ396871_c	GQ396871_o	GQ396871_f	GQ396871_g	NA	5.08e-06
H	OTU_1181	8	Bacteria	Planctomycetes	Planctomycetia	Planctomycetales	Planctomycetaceae	AY913229_g	NA	4.52e-06
H	OTU_1182	16	Bacteria	Planctomycetes	Planctomycetia	Planctomycetales	Planctomycetaceae	GQ263992_g	CU919129_s	9.04e-06
H	OTU_1184	8	Bacteria	Proteobacteria	Betaproteobacteria	Burkholderiales	Oxalobacteraceae	Paucimonas	EF580950_s	4.52e-06
H	OTU_1185	7	Bacteria	Chlamydiae	Chlamydiae_c	Chlamydiales	Rhabdochlamydiaceae	Rhabdochlamydia	JN051145_s	3.95e-06
H	OTU_1186	4	Bacteria	Proteobacteria	Betaproteobacteria	Sterolibacterium_o	Sterolibacterium_f	Sulfuritalea	NA	2.26e-06
H	OTU_1187	7	Bacteria	Proteobacteria	Betaproteobacteria	Burkholderiales	Comamonadaceae	Methylibium	Methylibium_petroleiphilum	3.95e-06
H	OTU_1189	1	Bacteria	Bacteroidetes	Bacteroidia	Bacteroidales	Odoribacteraceae	Odoribacter	Odoribacter_splanchnicus	5.65e-07
H	OTU_119	567	Bacteria	Proteobacteria	Gammaproteobacteria	Xanthomonadales	Xanthomonadaceae	Tahibacter	Tahibacter_aquaticus	0.000320262
H	OTU_1190	4	Bacteria	Proteobacteria	Alphaproteobacteria	Rhizobiales	Hyphomicrobiaceae	Pedomicrobium	FJ479379_s	2.26e-06
H	OTU_1191	12	Bacteria	Proteobacteria	Alphaproteobacteria	Rhizobiales	Hyphomicrobiaceae	Hyphomicrobium	FJ152725_s	6.78e-06
H	OTU_1192	14	Bacteria	Proteobacteria	Deltaproteobacteria	FM253572_o	FM253606_f	FM253606_g	NA	7.91e-06
H	OTU_1193	8	Bacteria	Proteobacteria	Alphaproteobacteria	Rickettsiales	Holosporaceae	EU360475_g	GU293202_s	4.52e-06
H	OTU_1194	7	Bacteria	Proteobacteria	Deltaproteobacteria	FM253572_o	FM253572_f	EU881241_g	EU881241_s	3.95e-06
H	OTU_1195	4	Bacteria	Planctomycetes	Planctomycetia	Planctomycetales	Gemmata_f	DQ906072_g	NA	2.26e-06
H	OTU_1196	3	Bacteria	Proteobacteria	Deltaproteobacteria	EU861868_o	EU861868_f	EU861868_g	NA	1.69e-06
H	OTU_1197	3	Bacteria	Chlamydiae	Chlamydiae_c	Chlamydiales	Parachlamydiaceae	NA	NA	1.69e-06
H	OTU_1198	2	Bacteria	Proteobacteria	Alphaproteobacteria	Rhodospirillales	EF032738_f	AY662029_g	NA	1.13e-06
H	OTU_12	17218	Bacteria	Proteobacteria	Alphaproteobacteria	Sphingomonadales	Sphingomonadaceae	Sphingorhabdus	NA	0.00972535
H	OTU_120	26	Bacteria	Proteobacteria	Betaproteobacteria	Burkholderiales	Sutterellaceae	Sutterella	AY684426_s	1.47e-05
H	OTU_121	570	Bacteria	Proteobacteria	Deltaproteobacteria	Bdellovibrionales	Bdellovibrionaceae	EU104230_g	EU104230_s	0.000321957
H	OTU_122	466	Bacteria	Proteobacteria	Gammaproteobacteria	Legionellales	Coxiellaceae	NA	NA	0.000263214
H	OTU_123	488	Bacteria	NA	NA	NA	NA	NA	NA	0.00027564
H	OTU_125	6	Bacteria	Proteobacteria	Betaproteobacteria	Burkholderiales	Oxalobacteraceae	Massilia	Massilia_aurea	3.39e-06
H	OTU_126	836	Bacteria	Proteobacteria	Betaproteobacteria	Sterolibacterium_o	Sterolibacterium_f	Methyloversatilis	Methyloversatilis_discipulorum	0.000472203
H	OTU_127	1533	Bacteria	Proteobacteria	Deltaproteobacteria	FM253572_o	GU208445_f	GU208445_g	JN039010_s	0.000865894
H	OTU_128	552	Bacteria	Proteobacteria	Alphaproteobacteria	Rhizobiales	Bradyrhizobiaceae	Pseudolabrys	NA	0.00031179
H	OTU_129	499	Bacteria	Proteobacteria	Gammaproteobacteria	Acidiferrobacterales	Acidiferrobacteraceae	GQ397041_g	GQ397041_s	0.000281853
H	OTU_13	13	Bacteria	Proteobacteria	Gammaproteobacteria	Pseudomonadales	Moraxellaceae	Acinetobacter	Acinetobacter_harbinensis	7.34e-06
H	OTU_130	947	Bacteria	Proteobacteria	Gammaproteobacteria	Chromatiales	NA	NA	NA	0.0005349
H	OTU_131	2	Bacteria	Bacteroidetes	Cytophagia	Cytophagales	Cytophagaceae	GU454944_g	JQ684161_s	1.13e-06
H	OTU_132	622	Bacteria	Planctomycetes	Planctomycetia	Planctomycetales	Planctomycetaceae	GQ263992_g	NA	0.000351328
H	OTU_134	696	Bacteria	Proteobacteria	Betaproteobacteria	Gallionellales	Gallionellaceae	Sideroxydans	GQ389049_s	0.000393126
H	OTU_135	1701	Bacteria	Proteobacteria	Alphaproteobacteria	Rhizobiales	Hyphomicrobiaceae	Hyphomicrobium	NA	0.000960787
H	OTU_136	1273	Bacteria	Proteobacteria	Deltaproteobacteria	AF269002_o	AF269002_f	AF269002_g	AF269002_s	0.000719037
H	OTU_137	406	Bacteria	Proteobacteria	Alphaproteobacteria	Rhodospirillales	Rhodospirillaceae	Reyranella	Reyranella_massiliensis	0.000229324
H	OTU_138	350	Bacteria	Proteobacteria	Alphaproteobacteria	Rhizobiales	Parvibaculum_f	AF370880_g	GQ500752_s	0.000197693
H	OTU_139	515	Bacteria	Proteobacteria	Alphaproteobacteria	Rickettsiales	Paracaedibacteraceae	AY328755_g	AY328755_s	0.000290891
H	OTU_14	49460	Bacteria	Cyanobacteria	JQ650114_c	JQ650114_o	JQ650114_f	JQ650114_g	AY375144_s	0.0279368
H	OTU_140	322	Bacteria	Saccharibacteria_TM7	Saccharimonas_c	Saccharimonas_o	JF421159_f	JF421159_g	FJ716004_s	0.000181877
H	OTU_141	419	Bacteria	Proteobacteria	Gammaproteobacteria	Legionellales	Coxiellaceae	NA	NA	0.000236666
H	OTU_142	287	Bacteria	Proteobacteria	Alphaproteobacteria	Rhodospirillales	Rhodospirillaceae	Dongia	Dongia_rigui	0.000162108
H	OTU_143	506	Bacteria	Proteobacteria	Deltaproteobacteria	Bdellovibrionales	Bacteriovoracaceae	NA	NA	0.000285807
H	OTU_144	613	Bacteria	Planctomycetes	Phycisphaerae	Phycisphaerales	Phycisphaeraceae	FJ572037_g	EF018317_s	0.000346245
H	OTU_145	5	Bacteria	Proteobacteria	Gammaproteobacteria	Enterobacteriales	Enterobacteriaceae	Escherichia	NA	2.82e-06
H	OTU_146	572	Bacteria	Proteobacteria	Alphaproteobacteria	Rickettsiales	Holosporaceae	EU360475_g	EU360475_s	0.000323086
H	OTU_147	340	Bacteria	Chlamydiae	Chlamydiae_c	Chlamydiales	Parachlamydiaceae	NA	NA	0.000192044
H	OTU_148	432	Bacteria	Proteobacteria	Deltaproteobacteria	Bdellovibrionales	Bacteriovoracaceae	NA	NA	0.000244009
H	OTU_149	862	Bacteria	Verrucomicrobia	Opitutae	Opitutales	Opitutaceae	Opitutus	AY622244_s	0.000486889
H	OTU_15	37479	Bacteria	Chlamydiae	Chlamydiae_c	Chlamydiales	Parachlamydiaceae	NA	NA	0.0211695
H	OTU_150	607	Bacteria	Proteobacteria	Alphaproteobacteria	Rhizobiales	Methylocystaceae	Methylocystis	Methylocystis_rosea	0.000342856
H	OTU_152	403	Bacteria	Proteobacteria	Gammaproteobacteria	Legionellales	Coxiellaceae	NA	NA	0.000227629
H	OTU_153	487	Bacteria	Proteobacteria	Alphaproteobacteria	Rhodospirillales	AY945895_f	AY945895_g	JX114339_s	0.000275075
H	OTU_154	348	Bacteria	Proteobacteria	Gammaproteobacteria	Legionellales	Coxiellaceae	DQ316803_g	DQ316803_s	0.000196563
H	OTU_155	347	Bacteria	Chlamydiae	Chlamydiae_c	Chlamydiales	Parachlamydiaceae	NA	NA	0.000195998
H	OTU_156	583	Bacteria	Proteobacteria	Gammaproteobacteria	Xanthomonadales	Xanthomonadaceae	Lysobacter	NA	0.0003293
H	OTU_157	567	Bacteria	Chlamydiae	Chlamydiae_c	Chlamydiales	Parachlamydiaceae	NA	NA	0.000320262
H	OTU_158	271	Eukarya	Phaeophyceae	Ectocarpales_c	Ectocarpales	EF574962_f	EF574962_g	JF917228_s	0.000153071
H	OTU_159	399	Bacteria	Proteobacteria	Gammaproteobacteria	Legionellales	Coxiellaceae	LKHV_g	NA	0.00022537
H	OTU_160	4	Bacteria	Firmicutes	Bacilli	Bacillales	Planococcaceae	Lysinibacillus	Lysinibacillus_sphaericus/Lysinibacillus_fusiformis/Lysinibacillus_mangiferihumi	2.26e-06
H	OTU_161	356	Bacteria	TM6	TM6_c	NA	NA	NA	NA	0.000201082
H	OTU_162	620	Bacteria	Acidobacteria	Blastocatellia	Blastocatellales	EU335275_f	EU335275_g	EF516020_s	0.000350199
H	OTU_166	44	Bacteria	Firmicutes	Clostridia	Clostridiales	Ruminococcaceae	Faecalibacterium	Faecalibacterium_prausnitzii	2.49e-05
H	OTU_167	30	Bacteria	Bacteroidetes	Bacteroidia	Bacteroidales	Prevotellaceae	Prevotella	NA	1.69e-05
H	OTU_168	577	Bacteria	Acidobacteria	Blastocatellia	Blastocatellales	EU335275_f	AY673412_g	NA	0.000325911
H	OTU_17	24722	Bacteria	Proteobacteria	Alphaproteobacteria	Sphingomonadales	Sphingomonadaceae	EU580479_g	EU937899_s	0.0139639
H	OTU_170	11	Bacteria	Proteobacteria	Gammaproteobacteria	Pseudomonadales	Moraxellaceae	Moraxella	Psychrobacter_ciconiae	6.21e-06
H	OTU_171	183	Bacteria	Bacteroidetes	Sphingobacteriia	Sphingobacteriales	Chitinophagaceae	Sediminibacterium	Sediminibacterium_goheungense	0.000103365
H	OTU_172	234	Bacteria	Proteobacteria	Alphaproteobacteria	Rhodospirillales	AY945895_f	AY945895_g	NA	0.000132172
H	OTU_173	268	Bacteria	Proteobacteria	Alphaproteobacteria	Rickettsiales	Holosporaceae	Caedibacter_g1	FJ236054_s	0.000151376
H	OTU_174	461	Bacteria	Proteobacteria	Gammaproteobacteria	Legionellales	Legionellaceae	Legionella	HM238165_s	0.00026039
H	OTU_177	253	Bacteria	Proteobacteria	Alphaproteobacteria	Rhodospirillales	Rhodospirillaceae	Reyranella	GQ263391_s	0.000142904
H	OTU_178	256	Bacteria	Proteobacteria	Alphaproteobacteria	Sphingomonadales	Sphingomonadaceae	Sphingorhabdus	JX949388_s	0.000144598
H	OTU_179	225	Bacteria	Bacteroidetes	Flavobacteria	Flavobacteriales	Flavobacteriaceae	Flavobacterium	NA	0.000127088
H	OTU_18	19776	Bacteria	Proteobacteria	Alphaproteobacteria	Parvularculales	Parvularculaceae	AY625139_g	JN628300_s	0.0111702
H	OTU_180	295	Bacteria	Proteobacteria	Alphaproteobacteria	Rickettsiales	Paracaedibacteraceae	Captivus	JQ770028_s	0.000166627
H	OTU_181	257	Bacteria	Proteobacteria	Gammaproteobacteria	Chromatiales	Thioalkalispiraceae	AY532574_g	EF654696_s	0.000145163
H	OTU_182	369	Bacteria	Saccharibacteria_TM7	Saccharimonas_c	Saccharimonas_o	Saccharimonas_f	Saccharimonas	AB511004_s	0.000208425
H	OTU_183	311	Bacteria	Proteobacteria	Alphaproteobacteria	Rhodospirillales	Rhodospirillaceae	AJ581585_g	AJ581585_s	0.000175664
H	OTU_184	261	Bacteria	Proteobacteria	Gammaproteobacteria	Legionellales	Legionellaceae	Legionella	NA	0.000147422
H	OTU_185	211	Bacteria	Chlamydiae	Chlamydiae_c	Chlamydiales	Parachlamydiaceae	NA	NA	0.00011918
H	OTU_187	282	Bacteria	Planctomycetes	Phycisphaerae	Phycisphaerales	Phycisphaeraceae	EF648043_g	EF648043_s	0.000159284
H	OTU_188	209	Bacteria	Proteobacteria	Gammaproteobacteria	Acidiferrobacterales	Acidiferrobacteraceae	GQ388826_g	GQ389118_s	0.000118051
H	OTU_19	21977	Bacteria	Proteobacteria	Betaproteobacteria	Burkholderiales	Comamonadaceae	Rhizobacter	NA	0.0124134
H	OTU_190	46	Bacteria	Bacteroidetes	Bacteroidia	Bacteroidales	Rikenellaceae	Alistipes	Alistipes_onderdonkii	2.6e-05
H	OTU_191	6	Bacteria	Proteobacteria	Alphaproteobacteria	Rhizobiales	Phyllobacteriaceae	Mesorhizobium	AVBN_s	3.39e-06
H	OTU_192	190	Bacteria	Proteobacteria	Gammaproteobacteria	Legionellales	Legionellaceae	Legionella	NA	0.000107319
H	OTU_193	135	Bacteria	Proteobacteria	Alphaproteobacteria	Rickettsiales	Holosporaceae	AB240378_g	GU362941_s	7.63e-05
H	OTU_195	311	Bacteria	Chlamydiae	Chlamydiae_c	Chlamydiales	Rhabdochlamydiaceae	Rhabdochlamydia	EU090707_s	0.000175664
H	OTU_196	1398	Bacteria	Proteobacteria	Alphaproteobacteria	Rhizobiales	Hyphomicrobiaceae	Hyphomicrobium	JN869143_s	0.000789641
H	OTU_197	341	Bacteria	Proteobacteria	Betaproteobacteria	Sulfuricellales	Sulfuricellaceae	Sulfuricella	DF967542_s	0.000192609
H	OTU_198	462	Bacteria	Proteobacteria	Betaproteobacteria	Sterolibacterium_o	Sterolibacterium_f	CP010554_g	HQ403201_s	0.000260954
H	OTU_199	810	Bacteria	Proteobacteria	Deltaproteobacteria	FM253572_o	EU491430_f	JF718671_g	AY921696_s	0.000457518
H	OTU_2	355	Bacteria	Proteobacteria	Gammaproteobacteria	Pseudomonadales	Pseudomonadaceae	Pseudomonas	Pseudomonas sp.	0.000200517
H	OTU_20	381	Bacteria	Proteobacteria	Betaproteobacteria	Burkholderiales	Comamonadaceae	EU978826_g	AY328716_s	0.000215203
H	OTU_200	308	Bacteria	Proteobacteria	Deltaproteobacteria	Bdellovibrionales	Bacteriovoracaceae	Peredibacter	AB176175_s	0.00017397
H	OTU_201	5	Bacteria	Firmicutes	Clostridia	Clostridiales	Ruminococcaceae	Subdoligranulum	DQ797332_s	2.82e-06
H	OTU_202	335	Bacteria	Proteobacteria	Deltaproteobacteria	Bdellovibrionales	AB630788_f	FJ478616_g	FJ478616_s	0.00018922
H	OTU_203	367	Bacteria	Proteobacteria	Gammaproteobacteria	Legionellales	Coxiellaceae	Aquicella	PAC000461_s	0.000207295
H	OTU_206	2	Bacteria	Proteobacteria	Betaproteobacteria	Burkholderiales	Sutterellaceae	Parasutterella	Parasutterella_excrementihominis	1.13e-06
H	OTU_207	185	Bacteria	Proteobacteria	Gammaproteobacteria	Pseudomonadales	Moraxellaceae	Cavicella	FJ719089_s	0.000104495
H	OTU_208	357	Bacteria	Elusimicrobia	Elusimicrobia_c	Elusimicrobiales	AF407708_f	AF407708_g	AY133074_s	0.000201647
H	OTU_209	366	Bacteria	Proteobacteria	Gammaproteobacteria	Legionellales	Coxiellaceae	EF492925_g	EF492925_s	0.00020673
H	OTU_21	16715	Bacteria	Proteobacteria	Gammaproteobacteria	Legionellales	Coxiellaceae	HQ827929_g	AF255642_s	0.00944124
H	OTU_210	197	Bacteria	Proteobacteria	Alphaproteobacteria	Rhizobiales	Hyphomicrobiaceae	Hyphomicrobium	JN869143_s	0.000111273
H	OTU_211	401	Bacteria	Actinobacteria	Actinobacteria_c	Corynebacteriales	Nocardiaceae	Williamsia	KB911540_s/Williamsia_faeni/Williamsia_limnetica	0.000226499
H	OTU_212	202	Bacteria	Proteobacteria	Gammaproteobacteria	Chromatiales	Thioalkalispiraceae	AY532574_g	AY532574_s	0.000114097
H	OTU_213	160	Bacteria	Proteobacteria	Deltaproteobacteria	Bdellovibrionales	Bdellovibrionaceae	Bdellovibrio	NA	9.04e-05
H	OTU_214	228	Bacteria	Cyanobacteria	JQ650114_c	JQ650114_o	JQ650114_f	JQ650114_g	AY945890_s	0.000128783
H	OTU_215	164	Bacteria	Proteobacteria	Alphaproteobacteria	Rickettsiales	Rickettsiaceae	DQ833504_g	JF016919_s	9.26e-05
H	OTU_216	284	Bacteria	Planctomycetes	Planctomycetia	Planctomycetales	Planctomycetaceae	EU881226_g	EF019496_s	0.000160414
H	OTU_217	160	Bacteria	Bacteroidetes	Flavobacteria	Flavobacteriales	Flavobacteriaceae	Flavobacterium	Flavobacterium_lindanitolerans	9.04e-05
H	OTU_219	763	Bacteria	Planctomycetes	Planctomycetia	Planctomycetales	Planctomycetaceae	AY913229_g	GQ264390_s	0.00043097
H	OTU_22	13343	Bacteria	Proteobacteria	Betaproteobacteria	NA	NA	NA	NA	0.00753661
H	OTU_220	188	Bacteria	Bacteroidetes	Sphingobacteriia	Sphingobacteriales	Chitinophagaceae	Terrimonas	HQ645184_s	0.000106189
H	OTU_221	179	Bacteria	Proteobacteria	Deltaproteobacteria	Bdellovibrionales	Bdellovibrionaceae	Bdellovibrio	Bdellovibrio_exovorus	0.000101106
H	OTU_223	194	Bacteria	Chlamydiae	Chlamydiae_c	Chlamydiales	EU363464_f	EU363464_g	EU363464_s	0.000109578
H	OTU_224	112	Bacteria	Acidobacteria	Blastocatellia	Blastocatellales	Blastocatellaceae	Aridibacter	Aridibacter_famidurans	6.33e-05
H	OTU_226	603	Bacteria	Proteobacteria	Alphaproteobacteria	Sphingomonadales	Sphingomonadaceae	Sphingopyxis	Sphingopyxis sp.	0.000340596
H	OTU_227	20	Bacteria	Proteobacteria	Betaproteobacteria	Burkholderiales	Comamonadaceae	Acidovorax	NA	1.13e-05
H	OTU_228	23	Bacteria	Proteobacteria	Alphaproteobacteria	Rhodobacterales	Rhodobacteraceae	Rhodobaca	Rhodobaca_bogoriensis/Rhodobaca_barguzinensis/Roseinatronobacter_monicus	1.3e-05
H	OTU_23	20817	Bacteria	Proteobacteria	Gammaproteobacteria	Chromatiales	DQ123671_f	DQ123671_g	DQ123671_s	0.0117582
H	OTU_230	11	Bacteria	Proteobacteria	Alphaproteobacteria	Rhodobacterales	Rhodobacteraceae	Paracoccus	Paracoccus_laeviglucosivorans/Paracoccus_yeei	6.21e-06
H	OTU_231	170	Bacteria	Proteobacteria	Gammaproteobacteria	Legionellales	Coxiellaceae	NA	NA	9.6e-05
H	OTU_232	168	Bacteria	Proteobacteria	Alphaproteobacteria	Sphingomonadales	Sphingomonadaceae	Sphingobium	NA	9.49e-05
H	OTU_234	143	Bacteria	Proteobacteria	Gammaproteobacteria	Legionellales	Legionellaceae	Legionella	NA	8.08e-05
H	OTU_235	139	Bacteria	Proteobacteria	Alphaproteobacteria	Rickettsiales	Rickettsiaceae	EF520417_g	EF667896_s	7.85e-05
H	OTU_236	239	Bacteria	Planctomycetes	Phycisphaerae	Phycisphaerales	Phycisphaeraceae	AF445645_g	NA	0.000134996
H	OTU_237	9	Bacteria	Firmicutes	Bacilli	Bacillales	Staphylococcaceae	Staphylococcus	NA	5.08e-06
H	OTU_238	141	Bacteria	Proteobacteria	Alphaproteobacteria	Rhodospirillales	AY945895_f	AY945895_g	JF175126_s	7.96e-05
H	OTU_239	282	Bacteria	Proteobacteria	Alphaproteobacteria	Rhodospirillales	Rhodospirillaceae	FJ711207_g	AB286642_s	0.000159284
H	OTU_24	10247	Bacteria	Proteobacteria	Gammaproteobacteria	Acidiferrobacterales	Acidiferrobacteraceae	GQ487954_g	GQ487954_s	0.00578788
H	OTU_240	170	Bacteria	Proteobacteria	Gammaproteobacteria	Legionellales	Legionellaceae	Legionella	PAC000456_s	9.6e-05
H	OTU_241	1	Bacteria	Proteobacteria	Gammaproteobacteria	Pseudomonadales	Moraxellaceae	Acinetobacter	NA	5.65e-07
H	OTU_242	179	Bacteria	Proteobacteria	Betaproteobacteria	Nitrosomonadales	Nitrosomonadaceae	Nitrosospira	Nitrosospira_tenuis	0.000101106
H	OTU_243	153	Bacteria	Chlamydiae	Chlamydiae_c	Chlamydiales	Rhabdochlamydiaceae	Rhabdochlamydia	EU133918_s	8.64e-05
H	OTU_244	156	Bacteria	Elusimicrobia	Elusimicrobia_c	Elusimicrobiales	AF407708_f	AF407708_g	AB748633_s	8.81e-05
H	OTU_245	110	Bacteria	Proteobacteria	Alphaproteobacteria	Rhodospirillales	Rhodospirillaceae	AY662021_g	NA	6.21e-05
H	OTU_246	149	Bacteria	Bacteroidetes	Sphingobacteriia	HQ178786_o	FJ793180_f	FJ793180_g	NA	8.42e-05
H	OTU_247	154	Bacteria	Cyanobacteria	JQ650114_c	JQ650114_o	JQ650114_f	JQ650114_g	NA	8.7e-05
H	OTU_248	226	Bacteria	Proteobacteria	Gammaproteobacteria	Oceanospirillales	EU287122_f	AY622251_g	AY622251_s	0.000127653
H	OTU_249	23	Bacteria	Proteobacteria	Alphaproteobacteria	Rhizobiales	Bradyrhizobiaceae	Tardiphaga	Tardiphaga_robiniae	1.3e-05
H	OTU_25	8224	Bacteria	Proteobacteria	Betaproteobacteria	Burkholderiales	Comamonadaceae	Acidovorax	Acidovorax_defluvii	0.00464522
H	OTU_250	354	Bacteria	Planctomycetes	Phycisphaerae	Phycisphaerales	Phycisphaeraceae	AB286397_g	AB286397_s	0.000199952
H	OTU_251	26211	Bacteria	Proteobacteria	Alphaproteobacteria	Sphingomonadales	Sphingomonadaceae	Sphingobium	NA	0.0148049
H	OTU_252	283	Bacteria	Proteobacteria	Deltaproteobacteria	FM253572_o	FM253572_f	FJ478897_g	NA	0.000159849
H	OTU_254	412	Bacteria	Proteobacteria	Deltaproteobacteria	FM253572_o	FM253606_f	FM253606_g	FM253606_s	0.000232713
H	OTU_256	481	Bacteria	Actinobacteria	Actinobacteria_c	Corynebacteriales	Nocardiaceae	Nocardia	NA	0.000271686
H	OTU_257	163	Bacteria	Proteobacteria	Alphaproteobacteria	Rhodospirillales	Rhodospirillaceae	AY234741_g	EU528234_s	9.21e-05
H	OTU_258	129	Bacteria	TM6	TM6_c	Babela_o	NA	NA	NA	7.29e-05
H	OTU_259	125	Bacteria	Chlamydiae	Chlamydiae_c	Chlamydiales	Parachlamydiaceae	Protochlamydia	FJ532292_s	7.06e-05
H	OTU_26	7595	Bacteria	Proteobacteria	Alphaproteobacteria	Rhizobiales	Hyphomicrobiaceae	Hyphomicrobium	NA	0.00428993
H	OTU_260	137	Bacteria	Planctomycetes	Planctomycetia	Planctomycetales	Gemmata_f	Gemmata	NA	7.74e-05
H	OTU_262	223	Bacteria	Proteobacteria	Deltaproteobacteria	Bdellovibrionales	AB511016_f	AB511016_g	NA	0.000125959
H	OTU_263	90	Bacteria	Proteobacteria	Alphaproteobacteria	Rhodospirillales	Micavibrio_f	HM459608_g	NA	5.08e-05
H	OTU_264	9	Bacteria	Proteobacteria	Gammaproteobacteria	Chromatiales	NA	NA	NA	5.08e-06
H	OTU_265	32	Bacteria	Bacteroidetes	Sphingobacteriia	Sphingobacteriales	Sphingobacteriaceae	Pedobacter	FJ192729_s	1.81e-05
H	OTU_266	4	Bacteria	Proteobacteria	Betaproteobacteria	Burkholderiales	Oxalobacteraceae	Undibacterium	Undibacterium_oligocarboniphilum	2.26e-06
H	OTU_267	166	Bacteria	Proteobacteria	Gammaproteobacteria	Acidiferrobacterales	Acidiferrobacteraceae	GQ388826_g	GQ388826_s	9.38e-05
H	OTU_268	85	Bacteria	Bacteroidetes	Flavobacteria	Flavobacteriales	Flavobacteriaceae	Flavobacterium	Flavobacterium_cheonhonense	4.8e-05
H	OTU_269	166	Bacteria	Parcubacteria_OD1	Paceibacter_c	CP011215_o	CP011215_f	LCRP_g	JQ311895_s	9.38e-05
H	OTU_27	1647	Bacteria	Proteobacteria	Alphaproteobacteria	Rhodobacterales	Hyphomonadaceae	CP012156_g	NA	0.000930286
H	OTU_270	271	Bacteria	Nitrospirae	Nitrospira_c	Nitrospirales	Nitrospiraceae	Nitrospira	JQ923566_s	0.000153071
H	OTU_271	140	Bacteria	Chlamydiae	Chlamydiae_c	Chlamydiales	Rhabdochlamydiaceae	Rhabdochlamydia	EU090707_s	7.91e-05
H	OTU_272	147	Bacteria	Bacteroidetes	Cytophagia	Cytophagales	Cytophagaceae	Dyadobacter	Dyadobacter_beijingensis	8.3e-05
H	OTU_273	117	Bacteria	Proteobacteria	Alphaproteobacteria	Rhodospirillales	AY945895_f	AY945895_g	EU801354_s	6.61e-05
H	OTU_276	235	Bacteria	Chlamydiae	Chlamydiae_c	Chlamydiales	Rhabdochlamydiaceae	Rhabdochlamydia	NA	0.000132737
H	OTU_277	11	Bacteria	Bacteroidetes	Flavobacteria	Flavobacteriales	Flavobacteriaceae	Flavobacterium	Flavobacterium_terrigena	6.21e-06
H	OTU_278	133	Bacteria	Parcubacteria_OD1	Paceibacter_c	CP011215_o	CP011215_f	ASKU_g	DQ676307_s	7.51e-05
H	OTU_279	149	Bacteria	Proteobacteria	Gammaproteobacteria	Acidiferrobacterales	Acidiferrobacteraceae	Acidiferrobacter	AY532575_s	8.42e-05
H	OTU_28	5472	Bacteria	Proteobacteria	Alphaproteobacteria	Rhizobiales	Cohaesibacteraceae	NA	NA	0.00309078
H	OTU_281	98	Bacteria	Proteobacteria	Gammaproteobacteria	Legionellales	Coxiellaceae	Aquicella	NA	5.54e-05
H	OTU_282	71	Bacteria	Bacteroidetes	Sphingobacteriia	HQ178786_o	HQ178786_f	DQ404664_g	FJ517685_s	4.01e-05
H	OTU_283	129	Bacteria	Proteobacteria	Deltaproteobacteria	Bdellovibrionales	Bacteriovoracaceae	Peredibacter	Peredibacter_starrii	7.29e-05
H	OTU_284	2	Bacteria	Actinobacteria	Actinobacteria_c	Micrococcales	Dermabacteraceae	Brachybacterium	NA	1.13e-06
H	OTU_285	82	Bacteria	Proteobacteria	Gammaproteobacteria	NA	NA	NA	NA	4.63e-05
H	OTU_286	133	Bacteria	Proteobacteria	Gammaproteobacteria	Acidiferrobacterales	Acidiferrobacteraceae	Sulfuricaulis	EF540405_s	7.51e-05
H	OTU_287	74	Bacteria	Proteobacteria	Alphaproteobacteria	Rickettsiales	Paracaedibacteraceae	Paracaedibacter	NA	4.18e-05
H	OTU_288	172	Bacteria	Planctomycetes	Planctomycetia	Planctomycetales	Planctomycetaceae	FJ543048_g	FJ543048_s	9.72e-05
H	OTU_289	120	Bacteria	Proteobacteria	Deltaproteobacteria	Myxococcales	Haliangiaceae	EU589248_g	JQ427645_s	6.78e-05
H	OTU_29	8951	Bacteria	Nitrospirae	Nitrospira_c	Nitrospirales	Nitrospiraceae	Nitrospira	DQ058676_s	0.00505585
H	OTU_290	204	Bacteria	Proteobacteria	Deltaproteobacteria	FM253572_o	FM253572_f	FM253572_g	AB630765_s	0.000115227
H	OTU_292	108	Bacteria	Acidobacteria	Blastocatellia	Blastocatellales	Blastocatellaceae	EU132424_g	JF265872_s	6.1e-05
H	OTU_293	122	Bacteria	Bacteroidetes	Cytophagia	Cytophagales	Cytophagaceae	JTCM_g	FJ660511_s	6.89e-05
H	OTU_296	74	Bacteria	Acidobacteria	Solibacteres	Solibacterales	Solibacteraceae	KB906767_g	AB286500_s	4.18e-05
H	OTU_297	129	Bacteria	Proteobacteria	Alphaproteobacteria	Rhodospirillales	Rhodospirillaceae	DQ984631_g	FM209171_s	7.29e-05
H	OTU_298	86	Bacteria	Proteobacteria	Betaproteobacteria	Burkholderiales	Oxalobacteraceae	Paucimonas	EF580950_s	4.86e-05
H	OTU_299	167	Bacteria	Acidobacteria	CP015136_c	CP015136_o	CP015136_f	GU187031_g	FJ230900_s	9.43e-05
H	OTU_3	12480	Bacteria	Proteobacteria	Alphaproteobacteria	Rhizobiales	Hyphomicrobiaceae	Hyphomicrobium	AY569281_s	0.00704916
H	OTU_30	5683	Bacteria	Proteobacteria	Alphaproteobacteria	Rhodospirillales	Rhodospirillaceae	HQ673885_g	EU266790_s	0.00320997
H	OTU_301	117	Bacteria	Proteobacteria	Betaproteobacteria	Gallionellales	Gallionellaceae	Gallionella	NA	6.61e-05
H	OTU_302	60	Bacteria	Proteobacteria	Deltaproteobacteria	Bdellovibrionales	Bdellovibrionaceae	FJ516839_g	JN245774_s	3.39e-05
H	OTU_303	99	Bacteria	Chlamydiae	Chlamydiae_c	Chlamydiales	Rhabdochlamydiaceae	Rhabdochlamydia	NA	5.59e-05
H	OTU_304	88	Bacteria	Proteobacteria	Alphaproteobacteria	Rhizobiales	Bradyrhizobiaceae	Pseudolabrys	NA	4.97e-05
H	OTU_305	18	Bacteria	Proteobacteria	Alphaproteobacteria	Rhizobiales	Chelatococcaceae	HQ697793_g	HQ697793_s	1.02e-05
H	OTU_306	206	Bacteria	Planctomycetes	AM056027_c	HQ681992_o	HQ681992_f	HQ681992_g	JQ278790_s	0.000116356
H	OTU_307	155	Bacteria	Proteobacteria	Gammaproteobacteria	Steroidobacter_o	Steroidobacter_f	EF999376_g	GQ500744_s	8.75e-05
H	OTU_308	177	Bacteria	Proteobacteria	Gammaproteobacteria	NA	NA	NA	NA	0.0001
H	OTU_309	230	Bacteria	Proteobacteria	Alphaproteobacteria	Sphingomonadales	Sphingomonadaceae	Blastomonas	Blastomonas_aquatica	0.000129912
H	OTU_31	2	Bacteria	Bacteroidetes	Flavobacteria	Flavobacteriales	Flavobacteriaceae	Chryseobacterium	Chryseobacterium_oleae	1.13e-06
H	OTU_310	52	Bacteria	Firmicutes	Clostridia	Clostridiales	Ruminococcaceae	Sporobacter	EF402484_s	2.94e-05
H	OTU_311	35	Bacteria	Proteobacteria	Gammaproteobacteria	Legionellales	Legionellaceae	Legionella	Legionella_lytica	1.98e-05
H	OTU_313	79	Bacteria	Proteobacteria	Alphaproteobacteria	NA	NA	NA	NA	4.46e-05
H	OTU_314	87	Bacteria	Chlamydiae	Chlamydiae_c	Chlamydiales	Rhabdochlamydiaceae	Rhabdochlamydia	JN051145_s	4.91e-05
H	OTU_315	123	Bacteria	Planctomycetes	Planctomycetia	Planctomycetales	Planctomycetaceae	AB630617_g	AM935300_s	6.95e-05
H	OTU_316	150	Bacteria	Planctomycetes	OM190_c	OM190_o	OM190_f	OM190_g	NA	8.47e-05
H	OTU_317	65	Bacteria	Planctomycetes	Phycisphaerae	Phycisphaerales	Phycisphaeraceae	EF648043_g	EF648043_s	3.67e-05
H	OTU_318	109	Bacteria	Planctomycetes	Phycisphaerae	HQ697838_o	HM066343_f	HM066343_g	HQ114017_s	6.16e-05
H	OTU_319	64	Bacteria	Proteobacteria	Alphaproteobacteria	Rickettsiales	Holosporaceae	Caedibacter_g1	FJ529966_s	3.61e-05
H	OTU_32	64	Bacteria	Proteobacteria	Alphaproteobacteria	Caulobacterales	Caulobacteraceae	Phenylobacterium	Phenylobacterium_haematophilum	3.61e-05
H	OTU_321	84	Bacteria	Actinobacteria	Actinobacteria_c	Corynebacteriales	Nocardiaceae	Nocardia	JF067335_s	4.74e-05
H	OTU_322	62	Bacteria	Chlamydiae	Chlamydiae_c	Chlamydiales	Parachlamydiaceae	NA	NA	3.5e-05
H	OTU_323	154	Bacteria	Proteobacteria	Betaproteobacteria	Gallionellales	Gallionellaceae	Gallionella	NA	8.7e-05
H	OTU_324	104	Bacteria	Verrucomicrobia	Verrucomicrobiae	Pedosphaera_o	Pedosphaera_f	Limisphaera	EU135437_s	5.87e-05
H	OTU_325	62	Bacteria	Chlamydiae	Chlamydiae_c	Chlamydiales	NA	NA	NA	3.5e-05
H	OTU_326	81	Bacteria	Chlamydiae	Chlamydiae_c	Chlamydiales	Parachlamydiaceae	NA	NA	4.58e-05
H	OTU_327	42	Bacteria	Planctomycetes	Phycisphaerae	Phycisphaerales	Phycisphaeraceae	HQ015458_g	HQ462490_s	2.37e-05
H	OTU_328	5	Bacteria	Firmicutes	Bacilli	Bacillales	Bacillaceae	Bacillus_g6	Bacillus_pseudofirmus	2.82e-06
H	OTU_329	103	Bacteria	Planctomycetes	Planctomycetia	Planctomycetales	Gemmata_f	Gemmata	FJ478935_s	5.82e-05
H	OTU_33	3754	Bacteria	Proteobacteria	Alphaproteobacteria	Sneathiellales	Ferrovibrio_f	NA	NA	0.0021204
H	OTU_330	119	Bacteria	Proteobacteria	Alphaproteobacteria	Rhizobiales	Bradyrhizobiaceae	Bradyrhizobium	AZSJ_s	6.72e-05
H	OTU_331	53	Bacteria	Proteobacteria	Deltaproteobacteria	Bdellovibrionales	Bdellovibrionaceae	FJ516839_g	JN038760_s	2.99e-05
H	OTU_332	88	Bacteria	Proteobacteria	Alphaproteobacteria	Rhodospirillales	Rhodospirillaceae	JF922455_g	EU335156_s	4.97e-05
H	OTU_333	48	Bacteria	Saccharibacteria_TM7	Saccharimonas_c	Saccharimonas_o	Saccharimonas_f	Saccharimonas	NA	2.71e-05
H	OTU_334	56	Bacteria	Proteobacteria	Alphaproteobacteria	Rhodospirillales	Micavibrio_f	NA	NA	3.16e-05
H	OTU_335	116	Bacteria	Proteobacteria	Alphaproteobacteria	Rhodospirillales	Rhodospirillaceae	Thalassobaculum	JN825379_s	6.55e-05
H	OTU_336	46	Bacteria	Proteobacteria	Gammaproteobacteria	NA	NA	NA	NA	2.6e-05
H	OTU_337	47	Bacteria	Proteobacteria	Alphaproteobacteria	NA	NA	NA	NA	2.65e-05
H	OTU_338	68	Bacteria	Proteobacteria	Betaproteobacteria	DQ009366_o	DQ009366_f	AM990454_g	FQ658888_s	3.84e-05
H	OTU_34	5326	Bacteria	Proteobacteria	Gammaproteobacteria	Pseudomonadales	Pseudomonadaceae	Pseudomonas	Pseudomonas sp.	0.00300832
H	OTU_340	102	Bacteria	Proteobacteria	Betaproteobacteria	Burkholderiales	Comamonadaceae	NA	NA	5.76e-05
H	OTU_341	184	Bacteria	Proteobacteria	Deltaproteobacteria	Bdellovibrionales	Bdellovibrionaceae	JX898164_g	EU499704_s	0.00010393
H	OTU_342	90	Bacteria	Planctomycetes	Phycisphaerae	Phycisphaerales	Phycisphaeraceae	AF445645_g	NA	5.08e-05
H	OTU_343	113	Bacteria	Proteobacteria	Gammaproteobacteria	Pseudomonadales	DQ337067_f	DQ337067_g	GQ342324_s	6.38e-05
H	OTU_344	131	Bacteria	Gemmatimonadetes	Gemmatimonadetes_c	Gemmatimonadales	EU881211_f	EU881211_g	AB630920_s	7.4e-05
H	OTU_345	60	Bacteria	Proteobacteria	Alphaproteobacteria	Rickettsiales	Paracaedibacteraceae	AJ867903_g	HM445499_s	3.39e-05
H	OTU_346	5	Bacteria	Proteobacteria	Alphaproteobacteria	Rickettsiales	Rickettsiaceae	Rickettsia	Rickettsia sp.	2.82e-06
H	OTU_347	144	Bacteria	Proteobacteria	Alphaproteobacteria	Rhodospirillales	AY957891_f	AY957891_g	JF048929_s	8.13e-05
H	OTU_348	50	Bacteria	Actinobacteria	Actinobacteria_c	Micrococcales	Microbacteriaceae	NA	NA	2.82e-05
H	OTU_349	127	Bacteria	Planctomycetes	Planctomycetia	Planctomycetales	Planctomycetaceae	X81954_g	EU135201_s	7.17e-05
H	OTU_35	5631	Bacteria	Proteobacteria	Gammaproteobacteria	Legionellales	Legionellaceae	Legionella	NA	0.00318059
H	OTU_350	168	Bacteria	Proteobacteria	Deltaproteobacteria	Bdellovibrionales	Bacteriovoracaceae	Bacteriovorax	Bacteriovorax_stolpii	9.49e-05
H	OTU_351	70	Bacteria	Proteobacteria	Gammaproteobacteria	Legionellales	Coxiellaceae	NA	NA	3.95e-05
H	OTU_353	120	Bacteria	Proteobacteria	Alphaproteobacteria	Rhizobiales	Rhizomicrobium_f	FJ479296_g	JF703349_s	6.78e-05
H	OTU_354	85	Bacteria	Verrucomicrobia	Spartobacteria	Chthoniobacterales	Chthoniobacteraceae	Terrimicrobium	NA	4.8e-05
H	OTU_355	155	Bacteria	Proteobacteria	Gammaproteobacteria	Legionellales	Legionellaceae	Legionella	NA	8.75e-05
H	OTU_356	62	Bacteria	Cyanobacteria	JQ650114_c	JQ650114_o	JQ650114_f	JQ650114_g	NA	3.5e-05
H	OTU_357	58	Bacteria	Proteobacteria	Betaproteobacteria	DQ395705_o	EU786132_f	EU786132_g	NA	3.28e-05
H	OTU_358	2	Bacteria	Proteobacteria	Alphaproteobacteria	Rickettsiales	Paracaedibacteraceae	Paracaedibacter	Odyssella_thessalonicensis	1.13e-06
H	OTU_36	13	Bacteria	Proteobacteria	Alphaproteobacteria	Sphingomonadales	Sphingomonadaceae	Sphingomonas	Sphingomonas sp.	7.34e-06
H	OTU_361	56	Bacteria	Proteobacteria	Gammaproteobacteria	Chromatiales	Methylohalomonas_f	AB619696_g	AB619696_s	3.16e-05
H	OTU_362	34	Bacteria	Proteobacteria	Alphaproteobacteria	Sphingomonadales	Sphingomonadaceae	Novosphingobium	Novosphingobium_piscinae	1.92e-05
H	OTU_363	59	Bacteria	Proteobacteria	Gammaproteobacteria	Legionellales	Coxiellaceae	NA	NA	3.33e-05
H	OTU_364	40	Bacteria	Verrucomicrobia	Spartobacteria	Chthoniobacterales	Chthoniobacteraceae	NA	NA	2.26e-05
H	OTU_365	43	Bacteria	Bacteroidetes	Sphingobacteriia	HQ178786_o	HQ178786_f	DQ404664_g	FJ517685_s	2.43e-05
H	OTU_366	73	Bacteria	Proteobacteria	Alphaproteobacteria	Rhodospirillales	Rhodospirillaceae	NA	NA	4.12e-05
H	OTU_367	42	Bacteria	Proteobacteria	Alphaproteobacteria	Rhodospirillales	Micavibrio_f	EU328098_g	FJ202562_s	2.37e-05
H	OTU_368	47	Bacteria	Proteobacteria	Gammaproteobacteria	Legionellales	Coxiellaceae	HQ827929_g	EU134713_s	2.65e-05
H	OTU_369	96	Bacteria	Proteobacteria	Deltaproteobacteria	Bdellovibrionales	FJ889281_f	AB425060_g	NA	5.42e-05
H	OTU_37	4003	Bacteria	Proteobacteria	Betaproteobacteria	DQ395705_o	DQ395705_f	DQ395705_g	FJ478717_s	0.00226104
H	OTU_370	50	Bacteria	Proteobacteria	Gammaproteobacteria	Legionellales	Legionellaceae	Legionella	NA	2.82e-05
H	OTU_371	102	Bacteria	Proteobacteria	Gammaproteobacteria	Oceanospirillales	FM242290_f	HQ697784_g	FQ660064_s	5.76e-05
H	OTU_372	52	Bacteria	Proteobacteria	Alphaproteobacteria	Rhizobiales	Devosia_f	HQ828005_g	HQ828005_s	2.94e-05
H	OTU_373	248	Bacteria	Proteobacteria	Alphaproteobacteria	Rhodospirillales	Rhodospirillaceae	Reyranella	Reyranella_soli	0.000140079
H	OTU_374	41	Bacteria	Cyanobacteria	JQ650114_c	JQ650114_o	JQ650114_f	JQ650114_g	NA	2.32e-05
H	OTU_375	3	Bacteria	Actinobacteria	Actinobacteria_c	Frankiales	Geodermatophilaceae	Blastococcus	Blastococcus_aggregatus	1.69e-06
H	OTU_376	316	Bacteria	Proteobacteria	Alphaproteobacteria	Rhizobiales	Hyphomicrobiaceae	Hyphomicrobium	JN869143_s	0.000178488
H	OTU_377	7	Bacteria	Bacteroidetes	Flavobacteria	Flavobacteriales	Flavobacteriaceae	Flavobacterium	AY212611_s	3.95e-06
H	OTU_379	7	Bacteria	Firmicutes	Bacilli	Bacillales	Bacillaceae	Bacillus	Bacillus_altitudinis	3.95e-06
H	OTU_38	3295	Bacteria	Proteobacteria	Gammaproteobacteria	Chromatiales	NA	NA	NA	0.00186114
H	OTU_380	34	Bacteria	Proteobacteria	Gammaproteobacteria	Legionellales	Coxiellaceae	EF492925_g	NA	1.92e-05
H	OTU_381	92	Bacteria	Proteobacteria	Gammaproteobacteria	Methylococcales	Methylomonas_f	Methylobacter	Methylobacter_tundripaludum	5.2e-05
H	OTU_382	39	Bacteria	Planctomycetes	Planctomycetia	Planctomycetales	Planctomycetaceae	GQ480028_g	GQ480028_s	2.2e-05
H	OTU_383	92	Bacteria	Acidobacteria	Blastocatellia	Blastocatellales	EU335275_f	HM187294_g	AM902631_s	5.2e-05
H	OTU_384	68	Bacteria	Verrucomicrobia	Verrucomicrobiae	Verrucomicrobiales	Verrucomicrobiaceae	Prosthecobacter	Prosthecobacter_fluviatilis	3.84e-05
H	OTU_385	46	Bacteria	Chlamydiae	Chlamydiae_c	Chlamydiales	Parachlamydiaceae	Parachlamydia	FCNU_s	2.6e-05
H	OTU_386	25	Bacteria	Chlamydiae	Chlamydiae_c	Chlamydiales	EU363464_f	EU363464_g	EU363464_s	1.41e-05
H	OTU_387	81	Bacteria	Actinobacteria	Actinobacteria_c	Corynebacteriales	Nocardiaceae	Nocardia	Nocardia_alba	4.58e-05
H	OTU_388	65	Bacteria	Proteobacteria	Gammaproteobacteria	NA	NA	NA	NA	3.67e-05
H	OTU_39	3670	Bacteria	Proteobacteria	Alphaproteobacteria	Rhodospirillales	Rhodospirillaceae	Dongia	NA	0.00207295
H	OTU_390	66	Bacteria	Acidobacteria	Blastocatellia	Blastocatellales	EU335275_f	FJ479597_g	JF266244_s	3.73e-05
H	OTU_391	18	Bacteria	Verrucomicrobia	Verrucomicrobiae	Verrucomicrobiales	Verrucomicrobiaceae	Prosthecobacter	JN090821_s	1.02e-05
H	OTU_392	28	Bacteria	Chlamydiae	Chlamydiae_c	Chlamydiales	Parachlamydiaceae	NA	NA	1.58e-05
H	OTU_393	24	Bacteria	Proteobacteria	Alphaproteobacteria	Rickettsiales	Rickettsiaceae	EF520403_g	EF520403_s	1.36e-05
H	OTU_394	60	Bacteria	Proteobacteria	Gammaproteobacteria	Legionellales	Legionellaceae	Legionella	Legionella_drozanskii	3.39e-05
H	OTU_395	71	Bacteria	Planctomycetes	Planctomycetia	Planctomycetales	Planctomycetaceae	GQ263926_g	FJ542837_s	4.01e-05
H	OTU_396	125	Bacteria	Proteobacteria	Gammaproteobacteria	Legionellales	Coxiellaceae	NA	NA	7.06e-05
H	OTU_397	17	Bacteria	Bacteroidetes	Bacteroidia	Bacteroidales	Porphyromonadaceae	Barnesiella	Barnesiella_intestinihominis	9.6e-06
H	OTU_398	51	Bacteria	Proteobacteria	Alphaproteobacteria	Rhizobiales	Parvibaculum_f	AF370880_g	AF370880_s	2.88e-05
H	OTU_399	26	Bacteria	Proteobacteria	Alphaproteobacteria	Rhodospirillales	EF032738_f	AY662029_g	NA	1.47e-05
H	OTU_4	704482	Bacteria	Proteobacteria	Alphaproteobacteria	Sphingomonadales	Sphingomonadaceae	Sphingobium	Sphingobium_xenophagum/JEMV_s	0.397917
H	OTU_400	1492	Bacteria	Proteobacteria	Alphaproteobacteria	Parvularculales	Parvularculaceae	AY625139_g	AY625139_s	0.000842736
H	OTU_401	61	Bacteria	Proteobacteria	Gammaproteobacteria	Legionellales	Legionellaceae	Legionella	AY050590_s	3.45e-05
H	OTU_402	66	Bacteria	Proteobacteria	Gammaproteobacteria	Legionellales	Coxiellaceae	FJ466216_g	NA	3.73e-05
H	OTU_403	61	Bacteria	Cyanobacteria	JQ650114_c	JQ650114_o	JQ650114_f	JQ650114_g	NA	3.45e-05
H	OTU_404	71	Bacteria	Proteobacteria	Deltaproteobacteria	Bdellovibrionales	Bacteriovoracaceae	Peredibacter	Peredibacter_starrii	4.01e-05
H	OTU_405	54	Bacteria	TM6	TM6_c	Babela_o	NA	NA	NA	3.05e-05
H	OTU_406	95	Bacteria	Proteobacteria	Gammaproteobacteria	Legionellales	Legionellaceae	Legionella	NA	5.37e-05
H	OTU_407	43	Bacteria	Proteobacteria	Alphaproteobacteria	Rhizobiales	Devosia_f	HQ828005_g	HQ828005_s	2.43e-05
H	OTU_408	57	Bacteria	Proteobacteria	Alphaproteobacteria	Rhodospirillales	Rhodospirillaceae	FM209132_g	FM209132_s	3.22e-05
H	OTU_409	40	Bacteria	Proteobacteria	Gammaproteobacteria	Legionellales	NA	NA	NA	2.26e-05
H	OTU_41	3551	Bacteria	Proteobacteria	Alphaproteobacteria	Sphingomonadales	Sphingomonadaceae	Sphingomonas	NA	0.00200573
H	OTU_410	467	Bacteria	Proteobacteria	Alphaproteobacteria	Sneathiellales	FJ889304_f	FJ889304_g	AJ581590_s	0.000263779
H	OTU_411	7	Bacteria	Firmicutes	Clostridia	Clostridiales	Ruminococcaceae	Oscillibacter	HQ400012_s	3.95e-06
H	OTU_413	65	Bacteria	Proteobacteria	Gammaproteobacteria	Legionellales	Coxiellaceae	Aquicella	FJ535311_s	3.67e-05
H	OTU_414	50	Bacteria	Proteobacteria	Gammaproteobacteria	Cellvibrionales	Cellvibrionaceae	Cellvibrio	Cellvibrio_mixtus	2.82e-05
H	OTU_415	71	Bacteria	Planctomycetes	Phycisphaerae	Phycisphaerales	Phycisphaeraceae	EU735627_g	FJ936783_s	4.01e-05
H	OTU_416	24	Bacteria	Firmicutes	Clostridia	Clostridiales	Lachnospiraceae	Agathobacter	Agathobacter_rectalis	1.36e-05
H	OTU_417	100	Bacteria	Proteobacteria	Deltaproteobacteria	Bdellovibrionales	AB511016_f	AB511016_g	JN229898_s	5.65e-05
H	OTU_418	35	Bacteria	Proteobacteria	Alphaproteobacteria	Rhodospirillales	EF032738_f	AY662029_g	NA	1.98e-05
H	OTU_419	42	Bacteria	Proteobacteria	Gammaproteobacteria	Legionellales	Coxiellaceae	NA	NA	2.37e-05
H	OTU_42	3454	Bacteria	Proteobacteria	Gammaproteobacteria	Chromatiales	EF157132_f	DQ378269_g	DQ378269_s	0.00195094
H	OTU_420	28	Bacteria	Proteobacteria	Alphaproteobacteria	Rickettsiales	Paracaedibacteraceae	NA	NA	1.58e-05
H	OTU_422	311	Bacteria	Planctomycetes	Planctomycetia	Planctomycetales	Planctomycetaceae	EU881226_g	NA	0.000175664
H	OTU_423	41	Bacteria	Proteobacteria	Gammaproteobacteria	Acidiferrobacterales	Acidiferrobacteraceae	GQ397041_g	GQ397041_s	2.32e-05
H	OTU_424	140	Bacteria	Planctomycetes	Planctomycetia	Planctomycetales	Planctomycetaceae	AY328798_g	AY625135_s	7.91e-05
H	OTU_426	45	Bacteria	Firmicutes	Clostridia	Clostridiales	Gracilibacteraceae	Gracilibacter	JX223504_s	2.54e-05
H	OTU_427	75	Bacteria	Proteobacteria	Betaproteobacteria	DQ009366_o	DQ009366_f	GQ263935_g	GQ263935_s	4.24e-05
H	OTU_428	27	Eukarya	NA	NA	NA	NA	NA	NA	1.53e-05
H	OTU_43	3357	Bacteria	Proteobacteria	Gammaproteobacteria	Chromatiales	DQ123671_f	DQ123671_g	EU328080_s	0.00189616
H	OTU_431	40	Bacteria	TM6	TM6_c	Babela_o	Babela_f	NA	NA	2.26e-05
H	OTU_433	25	Bacteria	Cyanobacteria	FJ810552_c	FJ810552_o	FJ810552_f	FJ810552_g	HQ114061_s	1.41e-05
H	OTU_434	33	Bacteria	Proteobacteria	Gammaproteobacteria	Legionellales	Coxiellaceae	AM991172_g	AM991172_s	1.86e-05
H	OTU_435	29	Bacteria	Chlamydiae	Chlamydiae_c	Chlamydiales	Parachlamydiaceae	NA	NA	1.64e-05
H	OTU_436	14	Unclassified	NA	NA	NA	NA	NA	NA	7.91e-06
H	OTU_437	61	Bacteria	Proteobacteria	Deltaproteobacteria	Bdellovibrionales	Bdellovibrionaceae	HQ114176_g	EF516801_s	3.45e-05
H	OTU_438	27	Bacteria	Parcubacteria_OD1	Paceibacter_c	CP011215_o	CP011215_f	NA	NA	1.53e-05
H	OTU_439	89	Bacteria	Planctomycetes	Planctomycetia	Planctomycetales	Planctomycetaceae	GQ397017_g	EF632949_s	5.03e-05
H	OTU_440	65	Bacteria	Bacteroidetes	Bacteroidia	Bacteroidales	Prevotellaceae	Prevotella	DQ796000_s	3.67e-05
H	OTU_441	40	Bacteria	Proteobacteria	Alphaproteobacteria	Rhodospirillales	Micavibrio_f	EU801307_g	NA	2.26e-05
H	OTU_442	31	Bacteria	Proteobacteria	Alphaproteobacteria	Rickettsiales	Rickettsiaceae	AY662020_g	AY662020_s	1.75e-05
H	OTU_443	43	Bacteria	Proteobacteria	Betaproteobacteria	Gallionellales	Gallionellaceae	Gallionella	Gallionella_ferruginea	2.43e-05
H	OTU_444	36	Bacteria	Proteobacteria	Deltaproteobacteria	Bdellovibrionales	EF516458_f	EF516458_g	NA	2.03e-05
H	OTU_445	78	Bacteria	Cyanobacteria	JF737898_c	GU174155_o	GU444060_f	GU444060_g	GQ480048_s	4.41e-05
H	OTU_446	67	Bacteria	Bacteroidetes	Cytophagia	Cytophagales	Cytophagaceae	Chryseolinea	NA	3.78e-05
H	OTU_447	27	Bacteria	Chlamydiae	Chlamydiae_c	Chlamydiales	Parachlamydiaceae	NA	NA	1.53e-05
H	OTU_448	17	Bacteria	Cyanobacteria	JQ650114_c	JQ650114_o	JQ650114_f	FJ236035_g	FJ236035_s	9.6e-06
H	OTU_45	3851	Bacteria	Proteobacteria	Alphaproteobacteria	Sneathiellales	FJ889304_f	FJ889304_g	HM069098_s	0.00217519
H	OTU_450	69	Bacteria	Proteobacteria	Alphaproteobacteria	Rhodospirillales	Rhodospirillaceae	AF407727_g	EU133389_s	3.9e-05
H	OTU_451	63	Bacteria	Proteobacteria	Deltaproteobacteria	Bdellovibrionales	Bdellovibrionaceae	Bdellovibrio	NA	3.56e-05
H	OTU_452	25	Bacteria	Bacteroidetes	Sphingobacteriia	HQ178786_o	NA	NA	NA	1.41e-05
H	OTU_453	29	Bacteria	Proteobacteria	Gammaproteobacteria	Legionellales	Coxiellaceae	Aquicella	NA	1.64e-05
H	OTU_454	45	Bacteria	Proteobacteria	Deltaproteobacteria	Bdellovibrionales	Bacteriovoracaceae	Peredibacter	NA	2.54e-05
H	OTU_455	29	Bacteria	Proteobacteria	Gammaproteobacteria	Legionellales	Coxiellaceae	GQ263713_g	GQ263713_s	1.64e-05
H	OTU_456	20	Bacteria	Actinobacteria	Actinobacteria_c	Corynebacteriales	Nocardiaceae	Rhodococcus	NA	1.13e-05
H	OTU_457	50	Bacteria	Planctomycetes	Planctomycetia	Planctomycetales	Gemmata_f	Gemmata	FJ623353_s	2.82e-05
H	OTU_459	33	Bacteria	Chlamydiae	Chlamydiae_c	Chlamydiales	Rhabdochlamydiaceae	Rhabdochlamydia	EU090707_s	1.86e-05
H	OTU_46	5612	Bacteria	Proteobacteria	Deltaproteobacteria	FM253572_o	FM253572_f	EU881241_g	EU881241_s	0.00316986
H	OTU_460	89	Bacteria	Parcubacteria_OD1	Paceibacter_c	LBQD_o	LBQD_f	HQ166700_g	HQ166700_s	5.03e-05
H	OTU_461	32	Bacteria	Planctomycetes	Planctomycetia	Planctomycetales	Planctomycetaceae	AY913229_g	EU589315_s	1.81e-05
H	OTU_462	34	Bacteria	Proteobacteria	Alphaproteobacteria	Rhizobiales	Bradyrhizobiaceae	Pseudolabrys	NA	1.92e-05
H	OTU_463	50	Bacteria	Proteobacteria	Deltaproteobacteria	Bdellovibrionales	Bacteriovoracaceae	Bacteriovorax	AJ290009_s	2.82e-05
H	OTU_464	38	Bacteria	Proteobacteria	Alphaproteobacteria	Rickettsiales	NA	NA	NA	2.15e-05
H	OTU_465	29	Bacteria	Proteobacteria	Gammaproteobacteria	Chromatiales	AF170421_f	GQ500795_g	GQ500795_s	1.64e-05
H	OTU_466	70	Bacteria	Proteobacteria	Gammaproteobacteria	Xanthomonadales	Xanthomonadaceae	AB240487_g	AB240487_s	3.95e-05
H	OTU_467	41	Bacteria	Proteobacteria	Deltaproteobacteria	Bdellovibrionales	Bacteriovoracaceae	Peredibacter	EF188429_s	2.32e-05
H	OTU_468	59	Bacteria	Planctomycetes	FJ516762_c	FJ516762_o	FJ516762_f	FJ516762_g	EU135252_s	3.33e-05
H	OTU_469	44	Bacteria	Proteobacteria	Alphaproteobacteria	Rickettsiales	FJ478621_f	HM129400_g	NA	2.49e-05
H	OTU_47	4380	Bacteria	Proteobacteria	Gammaproteobacteria	Acidiferrobacterales	Acidiferrobacteraceae	NA	NA	0.00247398
H	OTU_470	54	Bacteria	Proteobacteria	Gammaproteobacteria	Legionellales	Coxiellaceae	Aquicella	EF019160_s	3.05e-05
H	OTU_471	46	Bacteria	Proteobacteria	Gammaproteobacteria	Legionellales	Coxiellaceae	NA	NA	2.6e-05
H	OTU_472	52	Bacteria	Planctomycetes	Planctomycetia	Planctomycetales	Planctomycetaceae	FJ624888_g	GQ488002_s	2.94e-05
H	OTU_474	20	Bacteria	NA	NA	NA	NA	NA	NA	1.13e-05
H	OTU_475	10	Bacteria	Proteobacteria	Alphaproteobacteria	Rhodobacterales	Rhodobacteraceae	Rhodobacter	NA	5.65e-06
H	OTU_477	35	Bacteria	Proteobacteria	Gammaproteobacteria	Legionellales	Legionellaceae	Legionella	NA	1.98e-05
H	OTU_478	50	Bacteria	Proteobacteria	Deltaproteobacteria	Bdellovibrionales	Bdellovibrionaceae	JX898164_g	DQ128336_s	2.82e-05
H	OTU_479	62	Bacteria	Planctomycetes	OM190_c	OM190_o	OM190_f	OM190_g	GQ397035_s	3.5e-05
H	OTU_480	29	Bacteria	Chlamydiae	Chlamydiae_c	Chlamydiales	Rhabdochlamydiaceae	Rhabdochlamydia	EU090709_s	1.64e-05
H	OTU_481	43	Bacteria	Planctomycetes	Phycisphaerae	HQ697838_o	HM066343_f	HM066343_g	EU644198_s	2.43e-05
H	OTU_482	40	Bacteria	Proteobacteria	Alphaproteobacteria	Rhodospirillales	EF032738_f	AY662029_g	EF516974_s	2.26e-05
H	OTU_484	21	Bacteria	Proteobacteria	Alphaproteobacteria	Rhodospirillales	AY945895_f	AY945895_g	NA	1.19e-05
H	OTU_485	38	Bacteria	Proteobacteria	Betaproteobacteria	Gallionellales	Gallionellaceae	Gallionella	NA	2.15e-05
H	OTU_486	35	Bacteria	Chloroflexi	EU335161_c	EU335161_o	HQ697801_f	HQ697801_g	EF157231_s	1.98e-05
H	OTU_487	54	Bacteria	Bacteroidetes	Sphingobacteriia	CP012155_o	CP012155_f	FJ529921_g	FJ529921_s	3.05e-05
H	OTU_489	25	Bacteria	Chlamydiae	Chlamydiae_c	Chlamydiales	Rhabdochlamydiaceae	Rhabdochlamydia	JN051145_s	1.41e-05
H	OTU_49	688	Bacteria	Cyanobacteria	JQ650114_c	JQ650114_o	JQ650114_f	JQ650114_g	GQ389121_s	0.000388607
H	OTU_490	24	Bacteria	Chloroflexi	EU335161_c	AB186887_o	AB186887_f	AB186887_g	AB630821_s	1.36e-05
H	OTU_491	50	Bacteria	Bacteroidetes	Sphingobacteriia	Sphingobacteriales	Chitinophagaceae	Sediminibacterium	Sediminibacterium_salmoneum	2.82e-05
H	OTU_492	19	Bacteria	EU491789_p	JF144851_c	JF144851_o	JF144851_f	JF144851_g	JF144851_s	1.07e-05
H	OTU_493	26	Bacteria	Bacteroidetes	Flavobacteria	Flavobacteriales	Crocinitomicaceae	Fluviicola	HQ111170_s	1.47e-05
H	OTU_494	26	Bacteria	Chlamydiae	Chlamydiae_c	Chlamydiales	Rhabdochlamydiaceae	Rhabdochlamydia	EU090707_s	1.47e-05
H	OTU_495	27	Bacteria	Proteobacteria	Gammaproteobacteria	Legionellales	Coxiellaceae	EF492925_g	NA	1.53e-05
H	OTU_496	48	Bacteria	Proteobacteria	Gammaproteobacteria	Methylococcales	HQ697737_f	HQ697737_g	HQ697737_s	2.71e-05
H	OTU_497	36	Bacteria	Acidobacteria	Blastocatellia	Blastocatellales	EU335275_f	EU132241_g	EU132241_s	2.03e-05
H	OTU_498	33	Bacteria	Cyanobacteria	JF737898_c	GU174155_o	GU444060_f	GU444060_g	NA	1.86e-05
H	OTU_499	52	Bacteria	Proteobacteria	Betaproteobacteria	Gallionellales	Gallionellaceae	Gallionella	NA	2.94e-05
H	OTU_5	237464	Bacteria	Proteobacteria	Alphaproteobacteria	Sphingomonadales	Sphingomonadaceae	Novosphingobium	NA	0.134128
H	OTU_50	2956	Bacteria	Proteobacteria	Betaproteobacteria	Sterolibacterium_o	Sterolibacterium_f	CP010554_g	GQ500877_s	0.00166966
H	OTU_500	19	Bacteria	Proteobacteria	Alphaproteobacteria	Rhodospirillales	EF032738_f	AY662029_g	NA	1.07e-05
H	OTU_501	340	Bacteria	Proteobacteria	Betaproteobacteria	Burkholderiales	Comamonadaceae	AB672287_g	NA	0.000192044
H	OTU_504	35	Bacteria	Proteobacteria	Deltaproteobacteria	FM253572_o	FM253572_f	FM253572_g	HM445096_s	1.98e-05
H	OTU_505	35	Bacteria	Acidobacteria	Blastocatellia	Blastocatellales	EU335275_f	FJ479597_g	HM445431_s	1.98e-05
H	OTU_506	50	Bacteria	Planctomycetes	Planctomycetia	Planctomycetales	Gemmata_f	Gemmata	HQ592603_s	2.82e-05
H	OTU_508	22	Bacteria	Peregrinibacteria	Peribacteria	LBOR_o	AJ224539_f	AB530184_g	NA	1.24e-05
H	OTU_509	34	Bacteria	Bacteroidetes	Sphingobacteriia	HQ178786_o	HQ178786_f	DQ404664_g	NA	1.92e-05
H	OTU_51	3655	Bacteria	Proteobacteria	Deltaproteobacteria	Bdellovibrionales	Bacteriovoracaceae	Peredibacter	NA	0.00206448
H	OTU_510	36	Bacteria	BRC1	FP245541_c	FP245541_o	FP245541_f	HQ114038_g	HQ114038_s	2.03e-05
H	OTU_512	64	Bacteria	Bacteroidetes	Cytophagia	Cytophagales	Cytophagaceae	GU454944_g	GU368365_s	3.61e-05
H	OTU_513	25	Bacteria	Cyanobacteria	JQ650114_c	JQ650114_o	JQ650114_f	JQ650114_g	NA	1.41e-05
H	OTU_514	72	Bacteria	Proteobacteria	Betaproteobacteria	NA	NA	NA	NA	4.07e-05
H	OTU_516	20	Bacteria	Proteobacteria	Alphaproteobacteria	NA	NA	NA	NA	1.13e-05
H	OTU_517	35	Bacteria	Proteobacteria	Gammaproteobacteria	Legionellales	Coxiellaceae	NA	NA	1.98e-05
H	OTU_518	91	Bacteria	Planctomycetes	AM056027_c	HQ681992_o	HQ681992_f	EF515912_g	NA	5.14e-05
H	OTU_519	47	Bacteria	Proteobacteria	Betaproteobacteria	Burkholderiales	Oxalobacteraceae	Paucimonas	PAC000247_s	2.65e-05
H	OTU_52	2365	Bacteria	Proteobacteria	Gammaproteobacteria	Legionellales	Coxiellaceae	HQ827929_g	AF255642_s	0.00133584
H	OTU_520	9	Bacteria	Firmicutes	Clostridia	Clostridiales	Lachnospiraceae	Blautia	Blautia_wexlerae	5.08e-06
H	OTU_521	52	Bacteria	Proteobacteria	Gammaproteobacteria	Legionellales	Coxiellaceae	JN037980_g	NA	2.94e-05
H	OTU_522	38	Bacteria	Planctomycetes	Phycisphaerae	NA	NA	NA	NA	2.15e-05
H	OTU_523	43	Bacteria	Proteobacteria	Betaproteobacteria	Burkholderiales	Comamonadaceae	NA	NA	2.43e-05
H	OTU_525	40	Bacteria	Chlamydiae	Chlamydiae_c	Chlamydiales	Parachlamydiaceae	Neochlamydia	Neochlamydia_hartmannellae	2.26e-05
H	OTU_526	49	Bacteria	Planctomycetes	EU385896_c	EU385896_o	EF019689_f	EF019689_g	HM445103_s	2.77e-05
H	OTU_527	31	Bacteria	Cyanobacteria	JQ650114_c	JQ650114_o	JQ650114_f	JQ650114_g	AY945890_s	1.75e-05
H	OTU_528	22	Bacteria	Proteobacteria	Gammaproteobacteria	Legionellales	Coxiellaceae	FJ444660_g	FJ444660_s	1.24e-05
H	OTU_529	26	Bacteria	Proteobacteria	Gammaproteobacteria	Legionellales	Legionellaceae	Legionella	Legionella_pneumophila	1.47e-05
H	OTU_53	2199	Bacteria	Proteobacteria	Gammaproteobacteria	Chromatiales	Methylohalomonas_f	NA	NA	0.00124208
H	OTU_530	21	Bacteria	Proteobacteria	Alphaproteobacteria	Rhodobacterales	Hyphomonadaceae	CP012156_g	JN245761_s	1.19e-05
H	OTU_531	21	Bacteria	Proteobacteria	Alphaproteobacteria	Caulobacterales	Caulobacteraceae	Brevundimonas	Brevundimonas_alba/Brevundimonas_denitrificans	1.19e-05
H	OTU_533	16	Bacteria	Firmicutes	Clostridia	Clostridiales	Ruminococcaceae	Eubacterium_g8	Eubacterium_siraeum	9.04e-06
H	OTU_535	45	Bacteria	Proteobacteria	Alphaproteobacteria	Rhodospirillales	Rhodospirillaceae	AF234730_g	AF234730_s	2.54e-05
H	OTU_536	20	Bacteria	Proteobacteria	Alphaproteobacteria	NA	NA	NA	NA	1.13e-05
H	OTU_537	5	Bacteria	Proteobacteria	Alphaproteobacteria	Rickettsiales	Rickettsiaceae	NA	NA	2.82e-06
H	OTU_54	1984	Bacteria	Proteobacteria	Alphaproteobacteria	Rhizobiales	Parvibaculum_f	Parvibaculum	FJ375498_s	0.00112064
H	OTU_540	3	Bacteria	Proteobacteria	Betaproteobacteria	Burkholderiales	Comamonadaceae	Pelomonas	NA	1.69e-06
H	OTU_542	18	Bacteria	Cyanobacteria	JQ650114_c	JQ650114_o	JQ650114_f	JQ650114_g	JN616139_s	1.02e-05
H	OTU_543	33	Bacteria	Proteobacteria	Gammaproteobacteria	Chromatiales	Wenzhouxiangellaceae	EU734943_g	JX222000_s	1.86e-05
H	OTU_544	22	Bacteria	Proteobacteria	Deltaproteobacteria	Bdellovibrionales	Bdellovibrionaceae	JX898164_g	DQ130044_s	1.24e-05
H	OTU_545	33	Bacteria	Proteobacteria	Deltaproteobacteria	Bdellovibrionales	Bdellovibrionaceae	JX898164_g	NA	1.86e-05
H	OTU_546	7	Bacteria	Planctomycetes	Planctomycetia	Planctomycetales	Planctomycetaceae	EU881226_g	GU454939_s	3.95e-06
H	OTU_548	26	Bacteria	Proteobacteria	Deltaproteobacteria	Bdellovibrionales	AB511016_f	AB511016_g	JN229898_s	1.47e-05
H	OTU_549	39	Bacteria	Planctomycetes	EU589258_c	EU589258_o	EU589258_f	JQ580347_g	JQ580347_s	2.2e-05
H	OTU_55	1973	Bacteria	Saccharibacteria_TM7	Saccharimonas_c	Saccharimonas_o	Saccharimonas_f	Saccharimonas	FJ629383_s	0.00111442
H	OTU_550	18	Bacteria	Proteobacteria	Deltaproteobacteria	Bdellovibrionales	Bdellovibrionaceae	EU104230_g	HM243790_s	1.02e-05
H	OTU_552	30	Bacteria	Proteobacteria	Gammaproteobacteria	Legionellales	Coxiellaceae	NA	NA	1.69e-05
H	OTU_553	31	Bacteria	Proteobacteria	Deltaproteobacteria	Bdellovibrionales	FJ889281_f	AB425060_g	NA	1.75e-05
H	OTU_554	26	Bacteria	Proteobacteria	Gammaproteobacteria	Legionellales	Legionellaceae	Legionella	NA	1.47e-05
H	OTU_555	18	Bacteria	Proteobacteria	Deltaproteobacteria	Bdellovibrionales	Bdellovibrionaceae	Bdellovibrio	AY168736_s	1.02e-05
H	OTU_556	29	Bacteria	Proteobacteria	Deltaproteobacteria	Bdellovibrionales	Bdellovibrionaceae	Bdellovibrio	NA	1.64e-05
H	OTU_557	11	Bacteria	Bacteroidetes	Cytophagia	Cytophagales	Cytophagaceae	HQ324882_g	HQ324882_s	6.21e-06
H	OTU_558	10	Eukarya	Phaeophyceae	Ectocarpales_c	Ectocarpales	EF574962_f	NA	NA	5.65e-06
H	OTU_559	25	Bacteria	Proteobacteria	Alphaproteobacteria	Rickettsiales	Holosporaceae	NA	NA	1.41e-05
H	OTU_560	25	Bacteria	Proteobacteria	Gammaproteobacteria	Legionellales	Coxiellaceae	NA	NA	1.41e-05
H	OTU_561	25	Bacteria	Actinobacteria	Acidimicrobiia	Acidimicrobiales	Iamiaceae	GQ487905_g	GQ487905_s	1.41e-05
H	OTU_562	25	Bacteria	Proteobacteria	Deltaproteobacteria	Bdellovibrionales	Bdellovibrionaceae	JX489852_g	HQ120394_s	1.41e-05
H	OTU_563	41	Bacteria	Proteobacteria	Gammaproteobacteria	Legionellales	Coxiellaceae	NA	NA	2.32e-05
H	OTU_564	11	Bacteria	Planctomycetes	Planctomycetia	Planctomycetales	Planctomycetaceae	AY913229_g	AF234760_s	6.21e-06
H	OTU_565	22	Bacteria	Proteobacteria	Gammaproteobacteria	Legionellales	Coxiellaceae	FJ444660_g	AF526927_s	1.24e-05
H	OTU_566	45	Bacteria	Peregrinibacteria	Peribacteria	LBOR_o	EU937850_f	EU937850_g	JN609328_s	2.54e-05
H	OTU_567	22	Bacteria	Proteobacteria	Betaproteobacteria	Gallionellales	Gallionellaceae	Gallionella	GQ388822_s	1.24e-05
H	OTU_568	23	Bacteria	Chlamydiae	Chlamydiae_c	Chlamydiales	Parachlamydiaceae	Protochlamydia	Protochlamydia_amoebophila	1.3e-05
H	OTU_569	12	Bacteria	Proteobacteria	Deltaproteobacteria	Bdellovibrionales	Bdellovibrionaceae	Bdellovibrio	NA	6.78e-06
H	OTU_57	3668	Bacteria	Proteobacteria	Gammaproteobacteria	Legionellales	Coxiellaceae	HQ827929_g	AF255642_s	0.00207182
H	OTU_571	38	Bacteria	Proteobacteria	Gammaproteobacteria	Legionellales	Coxiellaceae	Aquicella	NA	2.15e-05
H	OTU_572	60	Bacteria	Proteobacteria	Alphaproteobacteria	Rhodospirillales	EF032738_f	AY662029_g	EF516974_s	3.39e-05
H	OTU_574	29	Bacteria	Proteobacteria	Gammaproteobacteria	Legionellales	NA	NA	NA	1.64e-05
H	OTU_575	13	Bacteria	Chlamydiae	Chlamydiae_c	Chlamydiales	Rhabdochlamydiaceae	Rhabdochlamydia	NA	7.34e-06
H	OTU_576	13	Bacteria	Proteobacteria	Gammaproteobacteria	Legionellales	Coxiellaceae	Coxiella	HF558543_s	7.34e-06
H	OTU_58	2083	Bacteria	Proteobacteria	Alphaproteobacteria	Rhizobiales	Hyphomicrobiaceae	Hyphomicrobium	FM253663_s	0.00117655
H	OTU_581	22	Bacteria	Proteobacteria	Gammaproteobacteria	Pseudomonadales	Moraxellaceae	Cavicella	AY622230_s	1.24e-05
H	OTU_582	23	Bacteria	Planctomycetes	Planctomycetia	Planctomycetales	Gemmata_f	NA	NA	1.3e-05
H	OTU_583	16	Bacteria	Proteobacteria	Gammaproteobacteria	Legionellales	Coxiellaceae	NA	NA	9.04e-06
H	OTU_584	33	Bacteria	DQ499300_p	DQ499300_c	EU134912_o	EU134912_f	EU134912_g	EU134913_s	1.86e-05
H	OTU_585	26	Bacteria	Proteobacteria	Gammaproteobacteria	Legionellales	Legionellaceae	Legionella	NA	1.47e-05
H	OTU_586	17	Bacteria	Bacteroidetes	Flavobacteria	Flavobacteriales	AJ224942_f	AJ224942_g	HE804148_s	9.6e-06
H	OTU_587	32	Bacteria	Spirochaetes	Spirochaetes_c	Spirochaetales	Leptospiraceae	Turneriella	Turneriella_parva	1.81e-05
H	OTU_590	29	Bacteria	Proteobacteria	Gammaproteobacteria	Legionellales	Coxiellaceae	LKHV_g	NA	1.64e-05
H	OTU_591	44	Bacteria	Proteobacteria	Betaproteobacteria	Gallionellales	Gallionellaceae	Gallionella	EU937950_s	2.49e-05
H	OTU_592	22	Bacteria	Acidobacteria	Blastocatellia	Blastocatellales	EU335275_f	HM187294_g	HM187294_s	1.24e-05
H	OTU_593	16	Bacteria	Proteobacteria	Alphaproteobacteria	Rhizobiales	NA	NA	NA	9.04e-06
H	OTU_594	12	Bacteria	Proteobacteria	Betaproteobacteria	Gallionellales	Gallionellaceae	Sideroxydans	NA	6.78e-06
H	OTU_595	106	Bacteria	Planctomycetes	Planctomycetia	Planctomycetales	Planctomycetaceae	AY913229_g	AF234735_s	5.99e-05
H	OTU_596	11	Bacteria	Proteobacteria	Alphaproteobacteria	Caulobacterales	Caulobacteraceae	NA	NA	6.21e-06
H	OTU_597	28	Eukarya	Phaeophyceae	Ectocarpales_c	Ectocarpales	EF574962_f	EF574962_g	NA	1.58e-05
H	OTU_598	761	Bacteria	Proteobacteria	Betaproteobacteria	Burkholderiales	Oxalobacteraceae	Massilia	NA	0.000429841
H	OTU_599	18	Bacteria	Proteobacteria	Gammaproteobacteria	Legionellales	Coxiellaceae	FJ517701_g	JF223638_s	1.02e-05
H	OTU_6	11	Bacteria	Proteobacteria	Gammaproteobacteria	Pseudomonadales	Pseudomonadaceae	Pseudomonas	Pseudomonas_peli	6.21e-06
H	OTU_60	912	Bacteria	Proteobacteria	Betaproteobacteria	Burkholderiales	Comamonadaceae	Aquabacterium	NA	0.000515131
H	OTU_600	30	Bacteria	Proteobacteria	Deltaproteobacteria	EU617842_o	FM253643_f	FM253643_g	AB672269_s	1.69e-05
H	OTU_601	11	Bacteria	Proteobacteria	Alphaproteobacteria	Rickettsiales	Rickettsiaceae	EU861930_g	EU861930_s	6.21e-06
H	OTU_602	15	Bacteria	Planctomycetes	Planctomycetia	Planctomycetales	Planctomycetaceae	FJ203423_g	GU201571_s	8.47e-06
H	OTU_603	24	Bacteria	Planctomycetes	Phycisphaerae	HQ697838_o	HM066343_f	EF522843_g	NA	1.36e-05
H	OTU_604	42	Bacteria	Proteobacteria	Gammaproteobacteria	Legionellales	Coxiellaceae	Aquicella	HQ120571_s	2.37e-05
H	OTU_605	4122	Bacteria	Proteobacteria	Alphaproteobacteria	Sphingomonadales	Sphingomonadaceae	Sphingopyxis	Sphingopyxis_witflariensis	0.00232826
H	OTU_606	3	Bacteria	Proteobacteria	Alphaproteobacteria	Rhodobacterales	Rhodobacteraceae	Rubellimicrobium	FM874293_s	1.69e-06
H	OTU_607	24	Bacteria	Acidobacteria	Blastocatellia	Blastocatellales	EU335275_f	EU335275_g	JQ769996_s	1.36e-05
H	OTU_608	80	Bacteria	Proteobacteria	Deltaproteobacteria	EU617842_o	EU617842_f	AM997336_g	HQ114023_s	4.52e-05
H	OTU_609	32	Bacteria	Chlamydiae	Chlamydiae_c	Chlamydiales	Chlamydiaceae	NA	NA	1.81e-05
H	OTU_61	85	Bacteria	Proteobacteria	Gammaproteobacteria	Xanthomonadales	Xanthomonadaceae	Stenotrophomonas	NA	4.8e-05
H	OTU_610	21	Bacteria	Chlamydiae	Chlamydiae_c	Chlamydiales	Parachlamydiaceae	NA	NA	1.19e-05
H	OTU_611	14	Bacteria	Proteobacteria	Gammaproteobacteria	NA	NA	NA	NA	7.91e-06
H	OTU_612	35	Bacteria	TM6	TM6_c	Babela_o	EF219035_f	EF219035_g	AB630938_s	1.98e-05
H	OTU_613	26	Bacteria	Proteobacteria	Alphaproteobacteria	Rhodospirillales	AY945895_f	AY945895_g	NA	1.47e-05
H	OTU_615	7	Bacteria	Bacteroidetes	Bacteroidia	Bacteroidales	Bacteroidaceae	Bacteroides	Bacteroides_vulgatus	3.95e-06
H	OTU_616	24	Bacteria	Cyanobacteria	JQ650114_c	JQ650114_o	JQ650114_f	JQ650114_g	FJ536878_s	1.36e-05
H	OTU_617	16	Bacteria	Bacteroidetes	Cytophagia	Cytophagales	Cytophagaceae	Cytophaga	FJ572666_s	9.04e-06
H	OTU_618	12	Bacteria	Proteobacteria	Alphaproteobacteria	Caulobacterales	Caulobacteraceae	Brevundimonas	Brevundimonas_mediterranea	6.78e-06
H	OTU_619	26	Bacteria	Proteobacteria	Alphaproteobacteria	Rickettsiales	Paracaedibacteraceae	AY947895_g	AY947895_s	1.47e-05
H	OTU_62	1819	Bacteria	Proteobacteria	Betaproteobacteria	DQ395705_o	DQ395705_f	DQ395705_g	FJ715983_s	0.00102744
H	OTU_620	18	Bacteria	Chlamydiae	Chlamydiae_c	Chlamydiales	EU363464_f	EU363464_g	JN616169_s	1.02e-05
H	OTU_621	19	Eukarya	Phaeophyceae	Ectocarpales_c	Ectocarpales	EF574962_f	EF574962_g	NA	1.07e-05
H	OTU_622	44	Bacteria	Proteobacteria	Deltaproteobacteria	Bdellovibrionales	Bdellovibrionaceae	JX898164_g	NA	2.49e-05
H	OTU_623	22	Bacteria	Chlamydiae	Chlamydiae_c	Chlamydiales	Parachlamydiaceae	Protochlamydia	NA	1.24e-05
H	OTU_624	15	Bacteria	Chlamydiae	Chlamydiae_c	Chlamydiales	EU363464_f	EU363464_g	EU363464_s	8.47e-06
H	OTU_625	885	Bacteria	Proteobacteria	Alphaproteobacteria	Sphingomonadales	Sphingomonadaceae	Sphingorhabdus	Sphingopyxis_contaminans	0.00049988
H	OTU_626	25	Bacteria	Chlamydiae	Chlamydiae_c	Chlamydiales	Parachlamydiaceae	NA	NA	1.41e-05
H	OTU_627	17	Bacteria	Bacteroidetes	Cytophagia	Cytophagales	Cytophagaceae	Cytophaga	AY218749_s	9.6e-06
H	OTU_629	14	Bacteria	Proteobacteria	Alphaproteobacteria	Rhodobacterales	Hyphomonadaceae	FJ439862_g	FJ439862_s	7.91e-06
H	OTU_63	1858	Bacteria	Proteobacteria	Gammaproteobacteria	Chromatiales	DQ123671_f	DQ123671_g	EU328080_s	0.00104947
H	OTU_632	29	Bacteria	Proteobacteria	Betaproteobacteria	Rhodocyclales	Rhodocyclaceae	Zoogloea	Zoogloea_resiniphila	1.64e-05
H	OTU_633	7	Bacteria	Proteobacteria	Betaproteobacteria	Sulfuricellales	Sulfuricellaceae	EU266800_g	EU266800_s	3.95e-06
H	OTU_634	24	Bacteria	Proteobacteria	Alphaproteobacteria	Rhodospirillales	AY945895_f	AY945895_g	JF175126_s	1.36e-05
H	OTU_635	16	Bacteria	Proteobacteria	Alphaproteobacteria	Rhizobiales	Devosia_f	Devosia	NA	9.04e-06
H	OTU_636	10	Bacteria	Proteobacteria	Alphaproteobacteria	Rhodospirillales	Rhodospirillaceae	NA	NA	5.65e-06
H	OTU_637	31	Bacteria	Proteobacteria	Deltaproteobacteria	Bdellovibrionales	Bdellovibrionaceae	JX489852_g	HQ120394_s	1.75e-05
H	OTU_638	19	Bacteria	Chlamydiae	Chlamydiae_c	Chlamydiales	Rhabdochlamydiaceae	Rhabdochlamydia	NA	1.07e-05
H	OTU_639	3	Bacteria	Actinobacteria	Actinobacteria_c	Propionibacteriales	Propionibacteriaceae	Propionibacterium	Propionibacterium_acnes	1.69e-06
H	OTU_64	3274	Bacteria	Proteobacteria	Alphaproteobacteria	Rhizobiales	Bradyrhizobiaceae	Bradyrhizobium	Bradyrhizobium sp.	0.00184928
H	OTU_640	8	Bacteria	Saccharibacteria_TM7	Saccharimonas_c	Saccharimonas_o	JF421159_f	JF421159_g	AB511000_s	4.52e-06
H	OTU_642	33	Bacteria	Proteobacteria	Gammaproteobacteria	Methylococcales	HQ697737_f	HQ697737_g	HQ697737_s	1.86e-05
H	OTU_643	27	Bacteria	Acidobacteria	Thermoanaerobaculum_c	Thermoanaerobaculum_o	EU881271_f	EU881271_g	NA	1.53e-05
H	OTU_644	27	Bacteria	Proteobacteria	Alphaproteobacteria	Rhodospirillales	AY957891_f	AY957891_g	JQ318941_s	1.53e-05
H	OTU_645	37	Bacteria	Chloroflexi	EU335161_c	AB186887_o	AB186887_f	AB186887_g	HQ640588_s	2.09e-05
H	OTU_646	11	Bacteria	Chlamydiae	Chlamydiae_c	Chlamydiales	Parachlamydiaceae	Parachlamydia	Parachlamydia_acanthamoebae	6.21e-06
H	OTU_647	16	Bacteria	Chlamydiae	Chlamydiae_c	Chlamydiales	DQ903996_f	DQ903996_g	DQ903996_s	9.04e-06
H	OTU_648	92	Bacteria	Actinobacteria	Rubrobacteria	Gaiellales	Gaiellaceae	Gaiella	HM445368_s	5.2e-05
H	OTU_649	20	Bacteria	Proteobacteria	Alphaproteobacteria	Sphingomonadales	Sphingomonadaceae	Sandarakinorhabdus	NA	1.13e-05
H	OTU_65	2756	Bacteria	Planctomycetes	Planctomycetia	Planctomycetales	Planctomycetaceae	Bythopirellula	JN672634_s	0.00155669
H	OTU_650	21	Bacteria	Chlamydiae	Chlamydiae_c	Chlamydiales	Parachlamydiaceae	NA	NA	1.19e-05
H	OTU_651	22	Bacteria	Proteobacteria	Alphaproteobacteria	Rhodospirillales	EF032738_f	AY662029_g	NA	1.24e-05
H	OTU_652	20	Bacteria	Bacteroidetes	Sphingobacteriia	Sphingobacteriales	Saprospiraceae	FN824940_g	NA	1.13e-05
H	OTU_653	20	Bacteria	Proteobacteria	Alphaproteobacteria	Rhodospirillales	AY945895_f	AY945895_g	NA	1.13e-05
H	OTU_654	28	Bacteria	Acidobacteria	Blastocatellia	Blastocatellales	EU335275_f	EU132241_g	EU132241_s	1.58e-05
H	OTU_655	798	Bacteria	Proteobacteria	Gammaproteobacteria	Pseudomonadales	Pseudomonadaceae	Pseudomonas	Pseudomonas sp.	0.000450739
H	OTU_656	14	Bacteria	Chlamydiae	Chlamydiae_c	Chlamydiales	Rhabdochlamydiaceae	Rhabdochlamydia	EU090707_s	7.91e-06
H	OTU_657	7	Bacteria	Proteobacteria	Alphaproteobacteria	Rickettsiales	FJ478621_f	HM129400_g	EU978823_s	3.95e-06
H	OTU_658	20	Bacteria	Bacteroidetes	Sphingobacteriia	HQ178786_o	HQ178786_f	HQ178786_g	AF534434_s	1.13e-05
H	OTU_659	16	Bacteria	Bacteroidetes	Bacteroidia	Bacteroidales	Prolixibacteraceae	HQ178936_g	FQ659581_s	9.04e-06
H	OTU_66	45	Bacteria	Proteobacteria	Betaproteobacteria	Burkholderiales	Comamonadaceae	Polaromonas	CP000316_s/AKIV_s	2.54e-05
H	OTU_660	8	Bacteria	Chlamydiae	Chlamydiae_c	Chlamydiales	Parachlamydiaceae	Metachlamydia	Metachlamydia_lacustris	4.52e-06
H	OTU_661	38	Bacteria	Proteobacteria	Gammaproteobacteria	Legionellales	Legionellaceae	Legionella	NA	2.15e-05
H	OTU_662	10	Bacteria	Proteobacteria	Gammaproteobacteria	Oceanospirillales	FM242473_f	FM242473_g	FQ659970_s	5.65e-06
H	OTU_663	9	Bacteria	Proteobacteria	Alphaproteobacteria	Rhodospirillales	EF032738_f	AY662029_g	NA	5.08e-06
H	OTU_664	16	Bacteria	Bacteroidetes	Flavobacteria	Flavobacteriales	Flavobacteriaceae	Chryseobacterium	Chryseobacterium_polytrichastri	9.04e-06
H	OTU_665	27	Bacteria	Planctomycetes	Planctomycetia	Planctomycetales	Planctomycetaceae	HQ828012_g	EU332801_s	1.53e-05
H	OTU_666	41	Bacteria	Proteobacteria	Betaproteobacteria	Burkholderiales	Comamonadaceae	NA	NA	2.32e-05
H	OTU_667	42	Bacteria	Planctomycetes	FJ444691_c	FJ444691_o	FJ444691_f	FJ444691_g	FJ444691_s	2.37e-05
H	OTU_668	38	Bacteria	Planctomycetes	Planctomycetia	Planctomycetales	Gemmata_f	NA	NA	2.15e-05
H	OTU_669	13	Bacteria	Proteobacteria	Gammaproteobacteria	Legionellales	Legionellaceae	Legionella	NA	7.34e-06
H	OTU_67	1346	Bacteria	Proteobacteria	Alphaproteobacteria	Rhodospirillales	Rhodospirillaceae	DQ984631_g	FR853419_s	0.00076027
H	OTU_670	15	Bacteria	Proteobacteria	Alphaproteobacteria	Rickettsiales	Rickettsiaceae	AY662020_g	AY662020_s	8.47e-06
H	OTU_671	35	Bacteria	Planctomycetes	Planctomycetia	Planctomycetales	Gemmata_f	NA	NA	1.98e-05
H	OTU_672	17	Bacteria	Proteobacteria	Deltaproteobacteria	FM253572_o	FM253572_f	FM253572_g	GQ406162_s	9.6e-06
H	OTU_673	24	Bacteria	Proteobacteria	Alphaproteobacteria	Rhodospirillales	NA	NA	NA	1.36e-05
H	OTU_674	14	Bacteria	Firmicutes	Negativicutes	Selenomonadales	Sporomusaceae	AJ009486_g	JF033098_s	7.91e-06
H	OTU_675	13	Bacteria	Proteobacteria	Alphaproteobacteria	Rhodospirillales	AY945895_f	AY945895_g	PAC000568_s	7.34e-06
H	OTU_676	44	Bacteria	Proteobacteria	Betaproteobacteria	Thiobacillus_o	Thiobacillus_f	Thiobacillus	EU662349_s	2.49e-05
H	OTU_677	29	Bacteria	Planctomycetes	Planctomycetia	Planctomycetales	Planctomycetaceae	AY913229_g	AF234760_s	1.64e-05
H	OTU_678	16	Bacteria	Proteobacteria	Alphaproteobacteria	Rickettsiales	Paracaedibacteraceae	Captivus	Captivus_acidiprotistae	9.04e-06
H	OTU_679	19	Bacteria	Chlamydiae	Chlamydiae_c	Chlamydiales	NA	NA	NA	1.07e-05
H	OTU_68	1220	Bacteria	Proteobacteria	Alphaproteobacteria	Rhodospirillales	Micavibrio_f	HQ218617_g	HQ218617_s	0.0006891
H	OTU_680	16	Bacteria	Planctomycetes	Planctomycetia	Planctomycetales	Gemmata_f	Gemmata	AM902601_s	9.04e-06
H	OTU_681	38	Bacteria	Proteobacteria	Deltaproteobacteria	Myxococcales	Sandaracinaceae	EF515980_g	NA	2.15e-05
H	OTU_682	19	Bacteria	Cyanobacteria	JF737898_c	GU174155_o	GU444060_f	GU444060_g	PAC000616_s	1.07e-05
H	OTU_683	19	Bacteria	Proteobacteria	Deltaproteobacteria	Bdellovibrionales	Bacteriovoracaceae	Peredibacter	NA	1.07e-05
H	OTU_684	49	Bacteria	Bacteroidetes	Cytophagia	Cytophagales	Cytophagaceae	JTCM_g	HQ674889_s	2.77e-05
H	OTU_685	14	Bacteria	Chlamydiae	Chlamydiae_c	Chlamydiales	Rhabdochlamydiaceae	Rhabdochlamydia	EU133918_s	7.91e-06
H	OTU_686	16	Bacteria	Cyanobacteria	JQ650114_c	JQ650114_o	JQ650114_f	JQ650114_g	NA	9.04e-06
H	OTU_687	20	Bacteria	Proteobacteria	Gammaproteobacteria	NA	NA	NA	NA	1.13e-05
H	OTU_688	8	Bacteria	Proteobacteria	Alphaproteobacteria	Rhizobiales	Methylobacteriaceae	Psychroglaciecola	EU861971_s	4.52e-06
H	OTU_689	16	Bacteria	Parcubacteria_OD1	Paceibacter_c	CP011215_o	CP011215_f	NA	NA	9.04e-06
H	OTU_690	13	Bacteria	Proteobacteria	Betaproteobacteria	Neisseriales	GU199451_f	DQ984558_g	AB240515_s	7.34e-06
H	OTU_691	67	Bacteria	Proteobacteria	Alphaproteobacteria	Sphingomonadales	Sphingomonadaceae	Sphingomonas	JF459933_s	3.78e-05
H	OTU_694	56	Bacteria	Proteobacteria	Alphaproteobacteria	Parvularculales	Parvularculaceae	AY625139_g	HQ697538_s	3.16e-05
H	OTU_696	18	Bacteria	Proteobacteria	Gammaproteobacteria	Legionellales	Legionellaceae	Legionella	NA	1.02e-05
H	OTU_697	37	Bacteria	Proteobacteria	Gammaproteobacteria	Legionellales	Legionellaceae	Legionella	NA	2.09e-05
H	OTU_698	37	Bacteria	Planctomycetes	OM190_c	OM190_o	OM190_f	OM190_g	JX105556_s	2.09e-05
H	OTU_699	6	Bacteria	Parcubacteria_OD1	Paceibacter_c	CP011215_o	CP011215_f	AY532578_g	AY532578_s	3.39e-06
H	OTU_70	2084	Bacteria	Planctomycetes	AM056027_c	HQ681992_o	HQ681992_f	HQ681992_g	FJ208828_s	0.00117712
H	OTU_700	10	Bacteria	Chlamydiae	Chlamydiae_c	Chlamydiales	Parachlamydiaceae	NA	NA	5.65e-06
H	OTU_701	26	Bacteria	Parcubacteria_OD1	Paceibacter_c	CP011209_o	NA	NA	NA	1.47e-05
H	OTU_702	20	Bacteria	Cyanobacteria	JQ650114_c	JQ650114_o	JQ650114_f	JQ650114_g	EU134274_s	1.13e-05
H	OTU_703	14	Bacteria	Proteobacteria	Alphaproteobacteria	Rhodospirillales	Rhodospirillaceae	NA	NA	7.91e-06
H	OTU_704	32	Bacteria	Acidobacteria	Holophagae	Holophagales	Holophagaceae	Holophaga	GQ342323_s	1.81e-05
H	OTU_705	20	Bacteria	Proteobacteria	Gammaproteobacteria	Legionellales	Coxiellaceae	NA	NA	1.13e-05
H	OTU_706	9	Bacteria	Planctomycetes	Planctomycetia	Planctomycetales	Planctomycetaceae	AJ231182_g	HM845987_s	5.08e-06
H	OTU_707	15	Bacteria	Cyanobacteria	JQ650114_c	JQ650114_o	JQ650114_f	JQ650114_g	HM445329_s	8.47e-06
H	OTU_708	35	Bacteria	Proteobacteria	Betaproteobacteria	Gallionellales	Gallionellaceae	Gallionella	CP002159_s	1.98e-05
H	OTU_709	47	Bacteria	Proteobacteria	Alphaproteobacteria	Rhizobiales	Bradyrhizobiaceae	Bradyrhizobium	Bradyrhizobium sp.	2.65e-05
H	OTU_71	2249	Bacteria	Proteobacteria	Betaproteobacteria	Burkholderiales	Comamonadaceae	Methylibium	Methylibium_petroleiphilum	0.00127032
H	OTU_710	32	Bacteria	Proteobacteria	Betaproteobacteria	Burkholderiales	Comamonadaceae	NA	NA	1.81e-05
H	OTU_711	14	Bacteria	Proteobacteria	Gammaproteobacteria	Legionellales	Legionellaceae	Legionella	Legionella_geestiana	7.91e-06
H	OTU_712	12	Bacteria	Proteobacteria	Deltaproteobacteria	Bdellovibrionales	Bdellovibrionaceae	Bdellovibrio	NA	6.78e-06
H	OTU_713	25	Bacteria	Planctomycetes	EU589258_c	EU589258_o	EU589258_f	EU589258_g	HQ385517_s	1.41e-05
H	OTU_715	11	Bacteria	Proteobacteria	Alphaproteobacteria	Sphingomonadales	Sphingomonadaceae	Sphingobium	Sphingobium_xenophagum/JEMV_s	6.21e-06
H	OTU_716	29	Bacteria	Planctomycetes	EU589258_c	EU589258_o	EU589258_f	GU230455_g	GQ339140_s	1.64e-05
H	OTU_717	9	Bacteria	Proteobacteria	Gammaproteobacteria	Legionellales	Legionellaceae	Legionella	NA	5.08e-06
H	OTU_718	10	Bacteria	Chlamydiae	Chlamydiae_c	Chlamydiales	Parachlamydiaceae	Protochlamydia	Protochlamydia_amoebophila	5.65e-06
H	OTU_719	11	Bacteria	Proteobacteria	Alphaproteobacteria	Rickettsiales	Rickettsiaceae	AM086142_g	NA	6.21e-06
H	OTU_720	14	Bacteria	Planctomycetes	Planctomycetia	Planctomycetales	Planctomycetaceae	AY266448_g	AY266448_s	7.91e-06
H	OTU_721	7	Bacteria	Proteobacteria	Alphaproteobacteria	Rhodospirillales	EF032738_f	NA	NA	3.95e-06
H	OTU_722	69	Bacteria	Planctomycetes	Planctomycetia	Planctomycetales	Gemmata_f	JF815519_g	EF018919_s	3.9e-05
H	OTU_724	9	Bacteria	TM6	TM6_c	Babela_o	TM6_f	TM6_g	DQ413113_s	5.08e-06
H	OTU_725	36	Bacteria	Planctomycetes	EU589258_c	EU589258_o	GQ250612_f	GQ250612_g	GQ250612_s	2.03e-05
H	OTU_726	35	Bacteria	Planctomycetes	Planctomycetia	Planctomycetales	Planctomycetaceae	AY913229_g	GQ263237_s	1.98e-05
H	OTU_727	10	Bacteria	BRC1	FP245541_c	FP245541_o	FP245541_f	HQ114038_g	EF580953_s	5.65e-06
H	OTU_728	11	Bacteria	Proteobacteria	Gammaproteobacteria	NA	NA	NA	NA	6.21e-06
H	OTU_729	18	Bacteria	Proteobacteria	Alphaproteobacteria	Rickettsiales	Rickettsiaceae	NA	NA	1.02e-05
H	OTU_73	1746	Bacteria	Proteobacteria	Gammaproteobacteria	Nevskiales	Sinobacteraceae	Nevskia	Nevskia_ramosa	0.000986204
H	OTU_730	14	Bacteria	Proteobacteria	Gammaproteobacteria	Legionellales	Coxiellaceae	FJ466216_g	EU134788_s	7.91e-06
H	OTU_731	19	Bacteria	Proteobacteria	Alphaproteobacteria	Rickettsiales	Paracaedibacteraceae	Paracaedibacter	Odyssella_thessalonicensis	1.07e-05
H	OTU_732	10	Bacteria	Proteobacteria	Alphaproteobacteria	Rickettsiales	FJ478621_f	HM129400_g	NA	5.65e-06
H	OTU_733	18	Bacteria	Parcubacteria_OD1	Paceibacter_c	CP011215_o	CP011215_f	EF516764_g	NA	1.02e-05
H	OTU_734	11	Bacteria	Proteobacteria	Alphaproteobacteria	Sneathiellales	EF173360_f	EF173360_g	GQ261313_s	6.21e-06
H	OTU_735	13	Bacteria	Bacteroidetes	Flavobacteria	Flavobacteriales	Flavobacteriaceae	Chryseobacterium	NA	7.34e-06
H	OTU_736	15	Bacteria	Planctomycetes	Phycisphaerae	Phycisphaerales	Tepidisphaeraceae	Tepidisphaera	NA	8.47e-06
H	OTU_737	10	Bacteria	Firmicutes	Clostridia	Clostridiales	Desulfitobacterium_f	Desulfosporosinus	JX120454_s	5.65e-06
H	OTU_738	32	Bacteria	Proteobacteria	Betaproteobacteria	Burkholderiales	Comamonadaceae	NA	NA	1.81e-05
H	OTU_739	11	Bacteria	Firmicutes	Clostridia	Clostridiales	Gracilibacteraceae	AM991201_g	JF027721_s	6.21e-06
H	OTU_74	1034	Bacteria	Proteobacteria	Alphaproteobacteria	Rickettsiales	Paracaedibacteraceae	Paracaedibacter	GQ385282_s	0.000584041
H	OTU_740	14	Bacteria	Proteobacteria	Gammaproteobacteria	NA	NA	NA	NA	7.91e-06
H	OTU_741	10	Bacteria	Omnitrophica_OP3	AQSZ_c	AQSZ_o	AQSZ_f	AQSZ_g	NA	5.65e-06
H	OTU_742	11	Bacteria	Proteobacteria	Alphaproteobacteria	Rickettsiales	AY344373_f	AY344373_g	NA	6.21e-06
H	OTU_743	19	Bacteria	Proteobacteria	Deltaproteobacteria	NA	NA	NA	NA	1.07e-05
H	OTU_744	10	Bacteria	Proteobacteria	Gammaproteobacteria	Legionellales	Coxiellaceae	HM598244_g	HM598244_s	5.65e-06
H	OTU_745	35	Bacteria	Planctomycetes	EU589258_c	EU589258_o	EU589258_f	EU589258_g	NA	1.98e-05
H	OTU_746	503	Bacteria	Proteobacteria	Alphaproteobacteria	Rhizobiales	Bradyrhizobiaceae	Rhodoplanes	PAC000730_s	0.000284113
H	OTU_747	13	Bacteria	Saccharibacteria_TM7	Saccharimonas_c	Saccharimonas_o	JF421159_f	JF421159_g	FJ542918_s	7.34e-06
H	OTU_748	10	Bacteria	Proteobacteria	Gammaproteobacteria	Legionellales	Coxiellaceae	FJ444660_g	AF526927_s	5.65e-06
H	OTU_749	1	Bacteria	Bacteroidetes	Bacteroidia	Bacteroidales	Porphyromonadaceae	Parabacteroides	Parabacteroides_merdae	5.65e-07
H	OTU_75	92	Bacteria	Proteobacteria	Alphaproteobacteria	Rhodospirillales	AY957891_f	AY957891_g	NA	5.2e-05
H	OTU_750	25	Bacteria	Planctomycetes	Planctomycetia	Planctomycetales	Planctomycetaceae	EU881226_g	JN869073_s	1.41e-05
H	OTU_751	16	Bacteria	Planctomycetes	Planctomycetia	Planctomycetales	Planctomycetaceae	AY328798_g	AY625135_s	9.04e-06
H	OTU_752	13	Bacteria	Chlamydiae	Chlamydiae_c	Chlamydiales	NA	NA	NA	7.34e-06
H	OTU_753	13	Bacteria	Proteobacteria	Gammaproteobacteria	Legionellales	Coxiellaceae	FJ444660_g	AF526927_s	7.34e-06
H	OTU_754	16	Bacteria	Proteobacteria	Alphaproteobacteria	Rickettsiales	Holosporaceae	Caedibacter_g1	JN448527_s	9.04e-06
H	OTU_755	11	Bacteria	Chlamydiae	Chlamydiae_c	Chlamydiales	Parachlamydiaceae	CCSC_g	CCSC_s	6.21e-06
H	OTU_756	18	Bacteria	Proteobacteria	Deltaproteobacteria	Bdellovibrionales	Bdellovibrionaceae	Bdellovibrio	JF028427_s	1.02e-05
H	OTU_757	13	Bacteria	Proteobacteria	Gammaproteobacteria	Legionellales	Legionellaceae	Legionella	FJ542894_s	7.34e-06
H	OTU_758	105	Bacteria	Proteobacteria	Alphaproteobacteria	Rhodospirillales	Rhodospirillaceae	AJ581585_g	AJ581585_s	5.93e-05
H	OTU_759	4	Bacteria	Proteobacteria	Alphaproteobacteria	Rhodospirillales	Rhodospirillaceae	NA	NA	2.26e-06
H	OTU_76	1379	Bacteria	Proteobacteria	Gammaproteobacteria	Xanthomonadales	Xanthomonadaceae	Arenimonas	Arenimonas_subflava	0.000778909
H	OTU_760	15	Bacteria	Planctomycetes	Planctomycetia	Planctomycetales	Planctomycetaceae	EU881226_g	NA	8.47e-06
H	OTU_761	19	Bacteria	Planctomycetes	Planctomycetia	Planctomycetales	Gemmata_f	Gemmata	PAC000641_s	1.07e-05
H	OTU_762	13	Bacteria	Parcubacteria_OD1	Paceibacter_c	CP011215_o	CP011215_f	ASKU_g	NA	7.34e-06
H	OTU_763	12	Bacteria	Planctomycetes	Planctomycetia	Planctomycetales	Planctomycetaceae	FJ203423_g	JX138676_s	6.78e-06
H	OTU_764	19	Bacteria	Proteobacteria	Alphaproteobacteria	Rickettsiales	Rickettsiaceae	AY662020_g	AY662020_s	1.07e-05
H	OTU_765	11	Bacteria	Parcubacteria_OD1	Paceibacter_c	LBQD_o	LBQD_f	HQ166700_g	HQ166700_s	6.21e-06
H	OTU_766	8	Bacteria	Proteobacteria	Deltaproteobacteria	Bdellovibrionales	FJ889281_f	AB425060_g	JF177266_s	4.52e-06
H	OTU_767	41	Bacteria	Proteobacteria	Betaproteobacteria	Gallionellales	Gallionellaceae	Sideroxydans	GQ389138_s	2.32e-05
H	OTU_768	10	Bacteria	Proteobacteria	Deltaproteobacteria	Bdellovibrionales	Bdellovibrionaceae	Bdellovibrio	JF028427_s	5.65e-06
H	OTU_769	8	Bacteria	Proteobacteria	Gammaproteobacteria	Chromatiales	NA	NA	NA	4.52e-06
H	OTU_77	971	Bacteria	Proteobacteria	Alphaproteobacteria	Sphingomonadales	Sphingomonadaceae	Sphingomonas	Sphingomonas_fonticola	0.000548456
H	OTU_770	9	Bacteria	Chlamydiae	Chlamydiae_c	Chlamydiales	NA	NA	NA	5.08e-06
H	OTU_771	6	Bacteria	Bacteroidetes	Sphingobacteriia	HQ178786_o	HQ178786_f	HQ178786_g	FM200994_s	3.39e-06
H	OTU_772	13	Bacteria	Proteobacteria	Alphaproteobacteria	Rickettsiales	Midichloriaceae	JSWE_g	GQ302530_s	7.34e-06
H	OTU_773	8	Bacteria	Chlamydiae	Chlamydiae_c	Chlamydiales	Parachlamydiaceae	Protochlamydia	NA	4.52e-06
H	OTU_774	16	Bacteria	Acidobacteria	Solibacteres	Solibacterales	Solibacteraceae	AY212581_g	EU132213_s	9.04e-06
H	OTU_775	22	Bacteria	Bacteroidetes	Bacteroidia	Bacteroidales	Bacteroidaceae	Bacteroides	Bacteroides_caccae	1.24e-05
H	OTU_776	25	Bacteria	Proteobacteria	Alphaproteobacteria	Rickettsiales	FJ478621_f	HM129400_g	NA	1.41e-05
H	OTU_78	1089	Bacteria	Proteobacteria	Gammaproteobacteria	Chromatiales	Methylohalomonas_f	EU753674_g	EU753674_s	0.000615107
H	OTU_781	1	Bacteria	Planctomycetes	Planctomycetia	Planctomycetales	Planctomycetaceae	CP011270_g	CP011270_s	5.65e-07
H	OTU_785	1	Bacteria	Proteobacteria	Betaproteobacteria	Burkholderiales	Oxalobacteraceae	Noviherbaspirillum	NA	5.65e-07
H	OTU_787	18	Bacteria	Proteobacteria	Alphaproteobacteria	Sphingomonadales	Sphingomonadaceae	Novosphingobium	NA	1.02e-05
H	OTU_79	999	Bacteria	Proteobacteria	Betaproteobacteria	Burkholderiales	Oxalobacteraceae	Undibacterium	Undibacterium_parvum	0.000564272
H	OTU_791	4	Bacteria	Planctomycetes	Planctomycetia	Planctomycetales	Planctomycetaceae	FJ542903_g	FJ542903_s	2.26e-06
H	OTU_792	10	Bacteria	Proteobacteria	Deltaproteobacteria	Bdellovibrionales	Bdellovibrionaceae	AM233527_g	NA	5.65e-06
H	OTU_793	10	Bacteria	Proteobacteria	Deltaproteobacteria	Desulfobulbaceae_o	Desulfobulbaceae	EU016437_g	EU016437_s	5.65e-06
H	OTU_794	9	Bacteria	Chlamydiae	Chlamydiae_c	Chlamydiales	Simkaniaceae	Fritschea	Fritschea_bemisiae	5.08e-06
H	OTU_795	16	Bacteria	GN04	EU385751_c	EU385751_o	EU385751_f	EU385751_g	EF580982_s	9.04e-06
H	OTU_796	11	Bacteria	Proteobacteria	Alphaproteobacteria	Rhodobacterales	Hyphomonadaceae	CP012156_g	NA	6.21e-06
H	OTU_797	9	Bacteria	Proteobacteria	Alphaproteobacteria	Rhodobacterales	Hyphomonadaceae	CP012156_g	GQ389040_s	5.08e-06
H	OTU_798	9	Bacteria	Planctomycetes	OM190_c	OM190_o	OM190_f	OM190_g	EU135158_s	5.08e-06
H	OTU_799	16	Bacteria	Planctomycetes	OM190_c	OM190_o	JF747678_f	JF747678_g	JF747678_s	9.04e-06
H	OTU_8	179804	Bacteria	Proteobacteria	Alphaproteobacteria	Sphingomonadales	Sphingomonadaceae	Sphingomonas	Sphingomonas_histidinilytica	0.10156
H	OTU_800	5	Bacteria	Proteobacteria	Deltaproteobacteria	Bdellovibrionales	CU925466_f	NA	NA	2.82e-06
H	OTU_802	22	Bacteria	Planctomycetes	Planctomycetia	Planctomycetales	Planctomycetaceae	GQ263926_g	FJ542837_s	1.24e-05
H	OTU_803	21	Bacteria	Acidobacteria	Blastocatellia	Blastocatellales	Chloracidobacterium_f	Chloracidobacterium	EF205532_s	1.19e-05
H	OTU_804	28	Bacteria	Proteobacteria	Deltaproteobacteria	Desulfuromonadales	Geobacteraceae	Geobacter	EU234232_s	1.58e-05
H	OTU_805	30	Bacteria	Planctomycetes	Planctomycetia	Planctomycetales	Gemmata_f	Gemmata	HQ119162_s	1.69e-05
H	OTU_806	16	Bacteria	Verrucomicrobia	Verrucomicrobiae	Pedosphaera_o	Pedosphaera_f	HQ864209_g	NA	9.04e-06
H	OTU_807	790	Bacteria	Proteobacteria	Alphaproteobacteria	Rhizobiales	Hyphomicrobiaceae	Hyphomicrobium	GQ500796_s	0.000446221
H	OTU_808	12	Bacteria	Bacteroidetes	Sphingobacteriia	HQ178786_o	HQ178786_f	HQ178786_g	JX114473_s	6.78e-06
H	OTU_809	10	Bacteria	Chlamydiae	Chlamydiae_c	Chlamydiales	Parachlamydiaceae	Protochlamydia	NA	5.65e-06
H	OTU_81	935	Bacteria	Proteobacteria	Alphaproteobacteria	Rhizobiales	Bosea_f	Bosea	Bosea_lathyri	0.000528122
H	OTU_810	7	Bacteria	Proteobacteria	Alphaproteobacteria	Sphingomonadales	Sphingomonadaceae	NA	NA	3.95e-06
H	OTU_811	15	Bacteria	Proteobacteria	Alphaproteobacteria	Rickettsiales	Anaplasmataceae	CU924630_g	CU924630_s	8.47e-06
H	OTU_812	12	Bacteria	Planctomycetes	Planctomycetia	Planctomycetales	Gemmata_f	NA	NA	6.78e-06
H	OTU_813	14	Bacteria	Proteobacteria	Gammaproteobacteria	Legionellales	Legionellaceae	Legionella	NA	7.91e-06
H	OTU_814	10	Bacteria	Chlamydiae	Chlamydiae_c	Chlamydiales	Parachlamydiaceae	Protochlamydia	NA	5.65e-06
H	OTU_815	26	Bacteria	Proteobacteria	Oligoflexia	Oligoflexales	Oligoflexaceae	Spirobacillus	JN869086_s	1.47e-05
H	OTU_816	24	Bacteria	Actinobacteria	Acidimicrobiia	Acidimicrobiales	Ilumatobacter_f	GQ387490_g	DQ228390_s	1.36e-05
H	OTU_817	7	Bacteria	Proteobacteria	Alphaproteobacteria	Rhizobiales	Phreatobacter_f	EU834774_g	EU834774_s	3.95e-06
H	OTU_818	6	Bacteria	Verrucomicrobia	Verrucomicrobiae	Pedosphaera_o	Pedosphaera_f	NA	NA	3.39e-06
H	OTU_819	15	Bacteria	Cyanobacteria	JQ650114_c	JQ650114_o	JQ650114_f	JQ650114_g	FJ536878_s	8.47e-06
H	OTU_82	1072	Bacteria	Proteobacteria	Alphaproteobacteria	Rhodospirillales	Rhodospirillaceae	AM997440_g	JF449941_s	0.000605505
H	OTU_821	11	Bacteria	Chlamydiae	Chlamydiae_c	Chlamydiales	Parachlamydiaceae	NA	NA	6.21e-06
H	OTU_822	12	Bacteria	Proteobacteria	Gammaproteobacteria	Legionellales	Legionellaceae	Legionella	NA	6.78e-06
H	OTU_823	14	Bacteria	Verrucomicrobia	Spartobacteria	Chthoniobacterales	Chthoniobacteraceae	NA	NA	7.91e-06
H	OTU_824	18	Bacteria	Proteobacteria	Alphaproteobacteria	Rhodospirillales	Rhodospirillaceae	NA	NA	1.02e-05
H	OTU_825	8	Bacteria	Peregrinibacteria	Peribacteria	FM207940_o	FM207940_f	FM207940_g	FM207940_s	4.52e-06
H	OTU_826	20	Bacteria	Proteobacteria	Gammaproteobacteria	Pseudomonadales	DQ337067_f	DQ337067_g	GQ342324_s	1.13e-05
H	OTU_827	38	Bacteria	Planctomycetes	Planctomycetia	Planctomycetales	Gemmata_f	FJ625346_g	NA	2.15e-05
H	OTU_828	8	Bacteria	Parcubacteria_OD1	Paceibacter_c	CP011209_o	LCQK_f	LCQG_g	LCQG_s	4.52e-06
H	OTU_83	964	Bacteria	Proteobacteria	Alphaproteobacteria	Rhizobiales	Hyphomicrobiaceae	Hyphomicrobium	JN090780_s	0.000544502
H	OTU_830	17	Bacteria	Proteobacteria	Gammaproteobacteria	Legionellales	Legionellaceae	Legionella	NA	9.6e-06
H	OTU_831	10	Bacteria	Omnitrophica_OP3	AQSZ_c	AQSZ_o	AQSZ_f	FP245539_g	NA	5.65e-06
H	OTU_832	4	Bacteria	Cyanobacteria	JQ650114_c	JQ650114_o	JQ650114_f	JQ650114_g	JQ650114_s	2.26e-06
H	OTU_833	17	Bacteria	Proteobacteria	Gammaproteobacteria	Legionellales	Coxiellaceae	PAC000738_g	PAC000738_s	9.6e-06
H	OTU_834	41	Bacteria	TM6	TM6_c	Babela_o	AM997772_f	JX271931_g	HQ330553_s	2.32e-05
H	OTU_835	19	Bacteria	Proteobacteria	Betaproteobacteria	Gallionellales	Gallionellaceae	Sideroxydans	AF351229_s	1.07e-05
H	OTU_836	14	Bacteria	Parcubacteria_OD1	Paceibacter_c	CP011215_o	CP011215_f	ASKU_g	JN397923_s	7.91e-06
H	OTU_838	11	Bacteria	Proteobacteria	Deltaproteobacteria	Bdellovibrionales	AM991258_f	HQ121229_g	HQ121229_s	6.21e-06
H	OTU_839	5	Bacteria	Proteobacteria	Alphaproteobacteria	Rhodospirillales	NA	NA	NA	2.82e-06
H	OTU_84	1033	Bacteria	Chlamydiae	Chlamydiae_c	Chlamydiales	Parachlamydiaceae	Protochlamydia	LN879502_s	0.000583476
H	OTU_841	19	Bacteria	Parcubacteria_OD1	Paceibacter_c	CP011215_o	CP011215_f	AY532578_g	FJ710673_s	1.07e-05
H	OTU_842	10	Bacteria	Proteobacteria	Alphaproteobacteria	Rhizobiales	NA	NA	NA	5.65e-06
H	OTU_843	1	Bacteria	Bacteroidetes	Bacteroidia	Bacteroidales	Porphyromonadaceae	Parabacteroides	Parabacteroides_distasonis	5.65e-07
H	OTU_845	4762	Bacteria	Proteobacteria	Alphaproteobacteria	Sphingomonadales	Sphingomonadaceae	NA	NA	0.00268975
H	OTU_846	5	Bacteria	Bacteroidetes	Bacteroidia	Bacteroidales	Rikenellaceae	Alistipes	Alistipes_inops	2.82e-06
H	OTU_847	4	Bacteria	Proteobacteria	Alphaproteobacteria	Sphingomonadales	Sphingomonadaceae	Novosphingobium	NA	2.26e-06
H	OTU_848	14	Bacteria	Peregrinibacteria	Peribacteria	LBOR_o	EU937850_f	EU937850_g	JN609328_s	7.91e-06
H	OTU_850	26	Bacteria	Proteobacteria	Gammaproteobacteria	Legionellales	Coxiellaceae	FJ542988_g	FJ542988_s	1.47e-05
H	OTU_851	18	Bacteria	Planctomycetes	OM190_c	OM190_o	AF407728_f	AF407728_g	JX875891_s	1.02e-05
H	OTU_852	17	Bacteria	Chlamydiae	Chlamydiae_c	Chlamydiales	Parachlamydiaceae	NA	NA	9.6e-06
H	OTU_853	5	Bacteria	Planctomycetes	Planctomycetia	Planctomycetales	Gemmata_f	DQ906072_g	NA	2.82e-06
H	OTU_854	13	Bacteria	Proteobacteria	Betaproteobacteria	Rhodocyclales	Rhodocyclaceae	Ferribacterium	Ferribacterium_limneticum	7.34e-06
H	OTU_855	7	Bacteria	Proteobacteria	Alphaproteobacteria	Rhodospirillales	AY945895_f	AY945895_g	PAC000428_s	3.95e-06
H	OTU_856	7	Bacteria	Planctomycetes	Planctomycetia	Planctomycetales	Gemmata_f	Zavarzinella	NA	3.95e-06
H	OTU_857	4	Bacteria	Cyanobacteria	Vampirovibrio_c	FR888536_o	FR888536_f	FR888536_g	HF996393_s	2.26e-06
H	OTU_858	4	Bacteria	Planctomycetes	OM190_c	OM190_o	OM190_f	OM190_g	HM445503_s	2.26e-06
H	OTU_859	10	Bacteria	Planctomycetes	Planctomycetia	Planctomycetales	Gemmata_f	NA	NA	5.65e-06
H	OTU_86	28	Bacteria	Proteobacteria	Gammaproteobacteria	Xanthomonadales	Xanthomonadaceae	Pseudoxanthomonas	Pseudoxanthomonas_mexicana	1.58e-05
H	OTU_860	25	Bacteria	Proteobacteria	Deltaproteobacteria	EU491876_o	EU491876_f	EU491876_g	JX193326_s	1.41e-05
H	OTU_861	30	Bacteria	Acidobacteria	CP015136_c	CP015136_o	CP015136_f	GU187031_g	GQ396965_s	1.69e-05
H	OTU_862	24	Bacteria	Proteobacteria	Alphaproteobacteria	Rhodospirillales	AY957891_f	AY957891_g	FM872831_s	1.36e-05
H	OTU_863	5	Bacteria	Proteobacteria	Gammaproteobacteria	Legionellales	Coxiellaceae	NA	NA	2.82e-06
H	OTU_864	7	Bacteria	Proteobacteria	Gammaproteobacteria	Pseudomonadales	DQ337067_f	DQ337067_g	AM935435_s	3.95e-06
H	OTU_865	5	Bacteria	Proteobacteria	Alphaproteobacteria	Rhizobiales	Rhizomicrobium_f	Rhizomicrobium	NA	2.82e-06
H	OTU_866	15	Bacteria	Parcubacteria_OD1	Paceibacter_c	CP011215_o	CP011215_f	ASKU_g	JX105635_s	8.47e-06
H	OTU_867	4	Bacteria	Proteobacteria	Gammaproteobacteria	Legionellales	Coxiellaceae	FJ517701_g	PAC000324_s	2.26e-06
H	OTU_868	14	Bacteria	Verrucomicrobia	Verrucomicrobiae	Pedosphaera_o	Pedosphaera_f	Limisphaera	EU135437_s	7.91e-06
H	OTU_869	11	Bacteria	Actinobacteria	Thermoleophilia	Solirubrobacterales	FN436189_f	FN436189_g	EF516031_s	6.21e-06
H	OTU_87	9	Bacteria	Bacteroidetes	Bacteroidia	Bacteroidales	Bacteroidaceae	Bacteroides	Bacteroides_uniformis	5.08e-06
H	OTU_870	14	Bacteria	Chlamydiae	Chlamydiae_c	Chlamydiales	Parachlamydiaceae	Protochlamydia	LN879502_s	7.91e-06
H	OTU_871	15	Bacteria	Planctomycetes	Planctomycetia	Planctomycetales	Planctomycetaceae	AY328798_g	AY625135_s	8.47e-06
H	OTU_872	12	Bacteria	Parcubacteria_OD1	LCGL_c	LCGL_o	LCFY_f	LCFY_g	FJ628344_s	6.78e-06
H	OTU_873	17	Bacteria	Planctomycetes	Planctomycetia	Planctomycetales	Gemmata_f	EF019897_g	EF019897_s	9.6e-06
H	OTU_874	10	Bacteria	Proteobacteria	Alphaproteobacteria	Rhodospirillales	Micavibrio_f	EU328098_g	NA	5.65e-06
H	OTU_875	6	Bacteria	Chlamydiae	Chlamydiae_c	Chlamydiales	Parachlamydiaceae	NA	NA	3.39e-06
H	OTU_876	10	Bacteria	Proteobacteria	Deltaproteobacteria	Bdellovibrionales	Bdellovibrionaceae	EU104230_g	DQ413094_s	5.65e-06
H	OTU_877	3	Bacteria	Firmicutes	Clostridia	Clostridiales	Ruminococcaceae	Oscillibacter	GQ896991_s	1.69e-06
H	OTU_878	4	Bacteria	Proteobacteria	Gammaproteobacteria	Legionellales	Coxiellaceae	FJ517701_g	NA	2.26e-06
H	OTU_879	24	Bacteria	Proteobacteria	Gammaproteobacteria	Legionellales	Coxiellaceae	Aquicella	JF796772_s	1.36e-05
H	OTU_88	1040	Bacteria	Proteobacteria	Alphaproteobacteria	Rhizobiales	Bradyrhizobiaceae	NA	NA	0.00058743
H	OTU_880	8	Bacteria	Cyanobacteria	JQ650114_c	JQ650114_o	JQ650114_f	JQ650114_g	NA	4.52e-06
H	OTU_881	61	Bacteria	Actinobacteria	Actinobacteria_c	Corynebacteriales	Mycobacteriaceae	Mycobacterium	Mycobacterium sp.	3.45e-05
H	OTU_882	7	Bacteria	Proteobacteria	Gammaproteobacteria	Legionellales	Legionellaceae	Legionella	Legionella_steelei	3.95e-06
H	OTU_883	11	Bacteria	Proteobacteria	Alphaproteobacteria	Rhodospirillales	Rhodospirillaceae	EU589272_g	EF516395_s	6.21e-06
H	OTU_884	13	Bacteria	Parcubacteria_OD1	Paceibacter_c	CP011215_o	CP011215_f	ASKU_g	JN397923_s	7.34e-06
H	OTU_885	12	Bacteria	Proteobacteria	Deltaproteobacteria	Desulfuromonadales	HM445455_f	EU037329_g	EU037329_s	6.78e-06
H	OTU_886	7	Bacteria	Proteobacteria	Gammaproteobacteria	Legionellales	Coxiellaceae	NA	NA	3.95e-06
H	OTU_887	6	Bacteria	Planctomycetes	Planctomycetia	Planctomycetales	Gemmata_f	DQ906072_g	FJ479310_s	3.39e-06
H	OTU_888	3	Bacteria	Acidobacteria	Solibacteres	Solibacterales	Solibacteraceae	EU881125_g	PAC000492_s	1.69e-06
H	OTU_889	8	Bacteria	Chlamydiae	Chlamydiae_c	Chlamydiales	Rhabdochlamydiaceae	Rhabdochlamydia	DQ903988_s	4.52e-06
H	OTU_89	1634	Bacteria	Proteobacteria	Gammaproteobacteria	Legionellales	Legionellaceae	Legionella	JQ923995_s	0.000922943
H	OTU_891	12	Bacteria	Spirochaetes	Spirochaetes_c	Spirochaetales	Leptospiraceae	Leptonema	NA	6.78e-06
H	OTU_892	9	Bacteria	Proteobacteria	Alphaproteobacteria	Rhodospirillales	Rhodospirillaceae	NA	NA	5.08e-06
H	OTU_893	48	Bacteria	Proteobacteria	Betaproteobacteria	Rhodocyclales	Rhodocyclaceae	Azospira	AY691423_s	2.71e-05
H	OTU_894	21	Bacteria	Proteobacteria	Oligoflexia	Oligoflexales	Oligoflexaceae	EU617864_g	NA	1.19e-05
H	OTU_895	6	Bacteria	Planctomycetes	Planctomycetia	Planctomycetales	Gemmata_f	NA	NA	3.39e-06
H	OTU_896	6	Bacteria	Proteobacteria	Alphaproteobacteria	Sphingomonadales	Erythrobacteraceae	NA	NA	3.39e-06
H	OTU_897	16	Bacteria	TM6	TM6_c	Babela_o	NA	NA	NA	9.04e-06
H	OTU_898	204	Bacteria	Proteobacteria	Alphaproteobacteria	Sphingomonadales	Sphingomonadaceae	Sphingobium	Sphingobium_xenophagum/JEMV_s	0.000115227
H	OTU_899	16	Bacteria	Bacteroidetes	Sphingobacteriia	Sphingobacteriales	Saprospiraceae	EU104080_g	FJ517715_s	9.04e-06
H	OTU_9	35	Bacteria	Proteobacteria	Alphaproteobacteria	Rhodobacterales	Hyphomonadaceae	CP012156_g	NA	1.98e-05
H	OTU_90	683	Bacteria	Proteobacteria	Alphaproteobacteria	Rickettsiales	Paracaedibacteraceae	Paracaedibacter	EU133464_s	0.000385783
H	OTU_900	18	Bacteria	Proteobacteria	Deltaproteobacteria	FM253572_o	FM253572_f	FM253572_g	HM445186_s	1.02e-05
H	OTU_901	14	Bacteria	Planctomycetes	Planctomycetia	Planctomycetales	Planctomycetaceae	AY913229_g	NA	7.91e-06
H	OTU_902	8	Bacteria	Chlamydiae	Chlamydiae_c	Chlamydiales	EU363464_f	EU363464_g	JN616169_s	4.52e-06
H	OTU_903	334	Bacteria	Proteobacteria	Alphaproteobacteria	Rhodospirillales	Rhodospirillaceae	AF407727_g	EF632901_s	0.000188655
H	OTU_904	13	Bacteria	Parcubacteria_OD1	Paceibacter_c	CP011215_o	CP011215_f	AY532578_g	AY532578_s	7.34e-06
H	OTU_905	8	Bacteria	Proteobacteria	Deltaproteobacteria	Bdellovibrionales	FJ889281_f	FJ889281_g	PAC000439_s	4.52e-06
H	OTU_906	6	Bacteria	Parcubacteria_OD1	Paceibacter_c	CP011215_o	CP011215_f	AY532578_g	NA	3.39e-06
H	OTU_908	17	Bacteria	Verrucomicrobia	Spartobacteria	Chthoniobacterales	Chthoniobacteraceae	NA	NA	9.6e-06
H	OTU_909	14	Bacteria	Proteobacteria	Deltaproteobacteria	Bdellovibrionales	Bacteriovoracaceae	Peredibacter	Peredibacter_starrii	7.91e-06
H	OTU_910	5	Bacteria	Acidobacteria	Solibacteres	Solibacterales	Solibacteraceae	HM131972_g	NA	2.82e-06
H	OTU_911	13	Bacteria	Proteobacteria	Gammaproteobacteria	Cellvibrionales	Cellvibrionaceae	Cellvibrio	EF515971_s	7.34e-06
H	OTU_912	14	Bacteria	Proteobacteria	Deltaproteobacteria	AF269002_o	AF269002_f	EF076134_g	JF266339_s	7.91e-06
H	OTU_913	22	Bacteria	Proteobacteria	Betaproteobacteria	Sulfuricellales	Sulfuricellaceae	EU266800_g	EU266800_s	1.24e-05
H	OTU_914	11	Bacteria	Proteobacteria	Alphaproteobacteria	Rickettsiales	FJ478621_f	HM129400_g	FJ901808_s	6.21e-06
H	OTU_915	8	Bacteria	Proteobacteria	Betaproteobacteria	CP012157_o	CP012157_f	CP012157_g	NA	4.52e-06
H	OTU_916	7	Bacteria	Proteobacteria	Alphaproteobacteria	Rhodospirillales	Rhodospirillaceae	LARJ_g	AM238019_s	3.95e-06
H	OTU_917	13	Bacteria	Proteobacteria	Alphaproteobacteria	Rickettsiales	FJ478621_f	GU303008_g	GU303008_s	7.34e-06
H	OTU_918	18	Bacteria	Planctomycetes	Planctomycetia	Planctomycetales	Planctomycetaceae	Schlesneria	AJ616287_s	1.02e-05
H	OTU_919	3	Eukarya	Phaeophyceae	Ectocarpales_c	Ectocarpales	EF574962_f	NA	NA	1.69e-06
H	OTU_92	1576	Bacteria	Chlamydiae	Chlamydiae_c	Chlamydiales	Parachlamydiaceae	NA	NA	0.000890182
H	OTU_920	11	Bacteria	Proteobacteria	Alphaproteobacteria	Sphingomonadales	Sphingomonadaceae	Sphingosinicella	Sphingosinicella_microcystinivorans/Sphingosinicella_xenopeptidilytica	6.21e-06
H	OTU_921	12	Bacteria	Proteobacteria	Deltaproteobacteria	Myxococcales	NA	NA	NA	6.78e-06
H	OTU_922	1039	Bacteria	Proteobacteria	Deltaproteobacteria	FM253572_o	FM253572_f	EU881241_g	EU881241_s	0.000586865
H	OTU_923	5	Bacteria	Proteobacteria	Deltaproteobacteria	Bdellovibrionales	CU925466_f	CU925466_g	NA	2.82e-06
H	OTU_924	12	Bacteria	Proteobacteria	Deltaproteobacteria	Bdellovibrionales	Bdellovibrionaceae	FJ516839_g	JN038760_s	6.78e-06
H	OTU_925	3	Bacteria	Firmicutes	Clostridia	Clostridiales	Christensenellaceae	HQ716403_g	NA	1.69e-06
H	OTU_926	342	Bacteria	Acidobacteria	Blastocatellia	Blastocatellales	Blastocatellaceae	NA	NA	0.000193174
H	OTU_927	12	Bacteria	Planctomycetes	Planctomycetia	Planctomycetales	Planctomycetaceae	Pirellula	DQ058680_s	6.78e-06
H	OTU_928	10	Bacteria	Proteobacteria	Gammaproteobacteria	Legionellales	Legionellaceae	Legionella	NA	5.65e-06
H	OTU_929	5	Bacteria	Bacteroidetes	Flavobacteria	Flavobacteriales	Flavobacteriaceae	Flavobacterium	NA	2.82e-06
H	OTU_93	104	Bacteria	Proteobacteria	Alphaproteobacteria	Sphingomonadales	Erythrobacteraceae	Porphyrobacter	Porphyrobacter_sanguineus	5.87e-05
H	OTU_930	12	Bacteria	Proteobacteria	Gammaproteobacteria	Legionellales	Coxiellaceae	Aquicella	PAC000459_s	6.78e-06
H	OTU_931	5	Bacteria	Proteobacteria	Gammaproteobacteria	FP929140_o	FP929140_f	FP929140_g	JN609374_s	2.82e-06
H	OTU_932	11	Bacteria	Chlamydiae	Chlamydiae_c	Chlamydiales	Parachlamydiaceae	NA	NA	6.21e-06
H	OTU_933	4	Bacteria	Proteobacteria	Alphaproteobacteria	Sphingomonadales	Sphingomonadaceae	NA	NA	2.26e-06
H	OTU_934	7	Bacteria	Chloroflexi	Anaerolineae	Anaerolinaeles	FJ478678_f	FJ478678_g	JF319289_s	3.95e-06
H	OTU_935	2090	Bacteria	Proteobacteria	Gammaproteobacteria	Chromatiales	DQ123671_f	DQ123671_g	DQ123671_s	0.00118051
H	OTU_936	13	Bacteria	Proteobacteria	Alphaproteobacteria	Rhodospirillales	Rhodospirillaceae	JADL_g	NA	7.34e-06
H	OTU_937	12	Bacteria	Proteobacteria	Betaproteobacteria	Neisseriales	GU199451_f	DQ984558_g	AB240515_s	6.78e-06
H	OTU_938	5	Bacteria	Proteobacteria	Betaproteobacteria	Burkholderiales	Oxalobacteraceae	Duganella	AMWD_s	2.82e-06
H	OTU_939	10	Bacteria	Proteobacteria	Gammaproteobacteria	Legionellales	Coxiellaceae	DQ316803_g	DQ316803_s	5.65e-06
H	OTU_94	2146	Bacteria	Actinobacteria	Actinobacteria_c	Corynebacteriales	Mycobacteriaceae	Mycobacterium	NA	0.00121214
H	OTU_940	8	Bacteria	Proteobacteria	Alphaproteobacteria	Rickettsiales	FJ478621_f	FJ478621_g	FJ478621_s	4.52e-06
H	OTU_941	6	Bacteria	Proteobacteria	Gammaproteobacteria	Legionellales	Coxiellaceae	Aquicella	HM445502_s	3.39e-06
H	OTU_942	4	Bacteria	Proteobacteria	Alphaproteobacteria	Sphingomonadales	NA	NA	NA	2.26e-06
H	OTU_943	18	Bacteria	Proteobacteria	Deltaproteobacteria	Bdellovibrionales	AB511016_f	AB511016_g	AB533955_s	1.02e-05
H	OTU_944	4	Bacteria	Proteobacteria	Gammaproteobacteria	Legionellales	Coxiellaceae	Coxiella	NA	2.26e-06
H	OTU_948	2	Bacteria	Proteobacteria	Alphaproteobacteria	Rhizobiales	Hyphomicrobiaceae	Hyphomicrobium	JN869143_s	1.13e-06
H	OTU_95	674	Bacteria	Proteobacteria	Gammaproteobacteria	Legionellales	Coxiellaceae	LKHV_g	LKAJ_s	0.0003807
H	OTU_956	23	Bacteria	Proteobacteria	Alphaproteobacteria	Rhizobiales	Bradyrhizobiaceae	Rhodopseudomonas	NA	1.3e-05
H	OTU_958	23	Bacteria	Proteobacteria	Alphaproteobacteria	Rhizobiales	Hyphomicrobiaceae	Hyphomicrobium	JN869143_s	1.3e-05
H	OTU_959	2	Bacteria	Proteobacteria	Alphaproteobacteria	Caulobacterales	Caulobacteraceae	Caulobacter	Caulobacter sp.	1.13e-06
H	OTU_96	1013	Bacteria	Proteobacteria	Betaproteobacteria	Gallionellales	Gallionellaceae	Sideroxydans	DQ228367_s	0.000572179
H	OTU_964	151	Bacteria	Proteobacteria	Alphaproteobacteria	Sphingomonadales	Sphingomonadaceae	Sphingobium	Sphingobium_limneticum	8.53e-05
H	OTU_968	2	Bacteria	Proteobacteria	Gammaproteobacteria	Legionellales	Coxiellaceae	FJ517701_g	PAC000324_s	1.13e-06
H	OTU_969	24	Bacteria	Nitrospirae	Nitrospira_c	Nitrospirales	DQ058677_f	DQ058677_g	HM187074_s	1.36e-05
H	OTU_97	961	Bacteria	Proteobacteria	Alphaproteobacteria	Rhodospirillales	Rhodospirillaceae	AF407727_g	NA	0.000542808
H	OTU_970	5	Bacteria	Saccharibacteria_TM7	Saccharimonas_c	Saccharimonas_o	Saccharimonas_f	Saccharimonas	AF525836_s	2.82e-06
H	OTU_971	7	Bacteria	Proteobacteria	Alphaproteobacteria	Rickettsiales	Paracaedibacteraceae	NA	NA	3.95e-06
H	OTU_973	11	Bacteria	Proteobacteria	Alphaproteobacteria	Rhodospirillales	Acetobacteraceae	Rhodopila	FQ659590_s	6.21e-06
H	OTU_974	3	Bacteria	Parcubacteria_OD1	Paceibacter_c	CP011215_o	CP011215_f	EF516764_g	JX105540_s	1.69e-06
H	OTU_975	22	Bacteria	Planctomycetes	EU385896_c	EU385896_o	EF019689_f	EF019689_g	EU135286_s	1.24e-05
H	OTU_976	5	Bacteria	Planctomycetes	Planctomycetia	Planctomycetales	Gemmata_f	Gemmata	Gemmata_obscuriglobus	2.82e-06
H	OTU_977	13	Bacteria	Verrucomicrobia	Spartobacteria	Chthoniobacterales	Chthoniobacteraceae	AJ575732_g	AJ575732_s	7.34e-06
H	OTU_978	9	Bacteria	Planctomycetes	Planctomycetia	Planctomycetales	Gemmata_f	FJ466217_g	GQ264186_s	5.08e-06
H	OTU_979	9	Bacteria	Planctomycetes	Planctomycetia	Planctomycetales	Gemmata_f	FJ478962_g	NA	5.08e-06
H	OTU_98	1025	Bacteria	Proteobacteria	Deltaproteobacteria	Bdellovibrionales	Bacteriovoracaceae	NA	NA	0.000578957
H	OTU_980	10	Bacteria	Planctomycetes	Phycisphaerae	Phycisphaerales	Phycisphaeraceae	FJ572037_g	EF018317_s	5.65e-06
H	OTU_981	11	Bacteria	Planctomycetes	OM190_c	OM190_o	AF407728_f	EF208657_g	NA	6.21e-06
H	OTU_982	18	Bacteria	Parcubacteria_OD1	Paceibacter_c	CP011215_o	CP011215_f	NA	NA	1.02e-05
H	OTU_983	3	Bacteria	Proteobacteria	Alphaproteobacteria	Sphingomonadales	Sphingomonadaceae	NA	NA	1.69e-06
H	OTU_984	10	Bacteria	Actinobacteria	Actinobacteria_c	Propionibacteriales	Nocardioidaceae	Aeromicrobium	NA	5.65e-06
H	OTU_985	8	Bacteria	Proteobacteria	Gammaproteobacteria	Legionellales	Legionellaceae	Legionella	NA	4.52e-06
H	OTU_986	11	Bacteria	Actinobacteria	Actinobacteria_c	Corynebacteriales	Corynebacteriaceae	Corynebacterium	Corynebacterium_thomssenii	6.21e-06
H	OTU_987	5	Bacteria	Proteobacteria	Gammaproteobacteria	Legionellales	EU491259_f	EU491259_g	NA	2.82e-06
H	OTU_988	6	Bacteria	Proteobacteria	Alphaproteobacteria	Rhodospirillales	Rhodospirillaceae	EU799766_g	EF516586_s	3.39e-06
H	OTU_99	686	Bacteria	Proteobacteria	Alphaproteobacteria	Sphingomonadales	Sphingomonadaceae	Sphingopyxis	NA	0.000387478
H	OTU_990	33	Bacteria	Proteobacteria	Deltaproteobacteria	FM253572_o	FM253572_f	FM253572_g	HQ114048_s	1.86e-05
H	OTU_991	18	Bacteria	Parcubacteria_OD1	Paceibacter_c	CP011209_o	LCQK_f	NA	NA	1.02e-05
H	OTU_992	15	Bacteria	Acidobacteria	Blastocatellia	Blastocatellales	EU335275_f	EU335275_g	EU244071_s	8.47e-06
H	OTU_994	5	Bacteria	Proteobacteria	Alphaproteobacteria	Rhizobiales	Devosia_f	HQ828005_g	HQ828005_s	2.82e-06
H	OTU_995	24	Bacteria	Planctomycetes	OM190_c	OM190_o	DQ071077_f	GQ389066_g	GQ261303_s	1.36e-05
H	OTU_996	6	Bacteria	Proteobacteria	Alphaproteobacteria	NA	NA	NA	NA	3.39e-06
H	OTU_997	7	Bacteria	Proteobacteria	Alphaproteobacteria	Rickettsiales	FJ478621_f	HM129400_g	NA	3.95e-06
H	OTU_998	3	Bacteria	Verrucomicrobia	Verrucomicrobiae	Pedosphaera_o	Pedosphaera_f	NA	NA	1.69e-06
H	OTU_999	2	Bacteria	Acidobacteria	Blastocatellia	Blastocatellales	Blastocatellaceae	Blastocatella	EF580977_s	1.13e-06
